# Supplementary material for: Two-step, high-yielding total synthesis of antibiotic pyrones
Source: Royal Society of Chemistry journal article supplement (doi:10.1039/d3ob01923c), 2023-12-14

## Supporting Information-II

### Two-step, High-yielding Total Synthesis of Antibiotic Pyrones

Akram Hussain,<sup>[a]‡</sup> Revoju Sravanthi,<sup>[a][b]‡</sup> Sunitha Katta,<sup>[b]</sup> and Dhevalapally B. Ramachary\*<sup>[a]</sup>

[a] Dr. Akram Hussain, Ms. Revoju Sravanthi, and Prof. Dr. Dhevalapally B. Ramachary  
Catalysis Laboratory, School of Chemistry, University of Hyderabad, Hyderabad-500 046, India; E-mail: ramsc@uohyd.ac.in,  
ramchary.db@gmail.com

[b] Dr. Sunitha Katta and Ms. Revoju Sravanthi, Pharmacognosy and Phytochemistry Division, Gitam Institute of Pharmacy, Gitam Deemed to  
be University, Visakhapatnam, 530 045, Andhra Pradesh, India

‡These authors contributed equally.

#### CONTENTS

|                                                                   | Page No |
|-------------------------------------------------------------------|---------|
| 1. Correlation NMR data of compound <b>7ab</b> (Isogermicidin B)  | S-3     |
| 2. Correlation NMR data of compound <b>7bb</b> (Isogermicidin A)  | S-4     |
| 3. Correlation NMR data of compound <b>7bc</b> (Photopyrone A)    | S-5     |
| 4. Correlation NMR data of compound <b>7cc</b> (Pseudopyronine A) | S-6     |
| 5. Correlation NMR data of compound <b>7gc</b> (Pseudopyronine B) | S-8     |
| 6. Correlation NMR data of compound <b>7jc</b> (Pseudopyronine C) | S-9     |
| 7. Correlation NMR data of compound <b>7bd</b> (Photopyrone B)    | S-11    |
| 8. Correlation NMR data of compound <b>7bh</b> (Germicidin I)     | S-13    |
| 9. Correlation NMR data of compound <b>7ch</b> (Violapyrone L)    | S-14    |

|                                                                                                                          |         |
|--------------------------------------------------------------------------------------------------------------------------|---------|
| 10. Correlation NMR data of compound <b>7dh</b> (Violapyrone J1)                                                         | S-15    |
| 11. Correlation NMR data of compound <b>7eh</b> (Violapyrone J)                                                          | S-16    |
| 12. Correlation NMR data of compound <b>7fh</b> (Violapyrone A)                                                          | S-18    |
| 13. Correlation NMR data of compound <b>7gh</b> (Violapyrone I)                                                          | S-19    |
| 14. Correlation NMR data of compound <b>7hh</b> (Violapyrone B)                                                          | S-20    |
| 15. Correlation NMR data of compound <b>7ih</b> (Violapyrone H)                                                          | S-21    |
| 16. Correlation NMR data of compound (-)- <b>7lh</b> [(-)-Violapyrone C]                                                 | S-23    |
| 17. Correlation NMR data of compound <b>11ch</b> (Childinin G)                                                           | S-24    |
| 18. Correlation NMR data of compound <b>11fh</b> (Violapyrone Q)                                                         | S-26    |
| 19. Correlation NMR data of compound <b>11gh</b> (Violapyrone S)                                                         | S-27    |
| 20. Correlation NMR data of compound <b>11hh</b> (Violapyrone R)                                                         | S-29    |
| 21. Correlation NMR data of compound <b>3d</b> (Fistupyrene)                                                             | S-30    |
| 22. Correlation HRMS data of compound <b>7be</b> (Photopyrone C), <b>7bf</b> (Photopyrone E), <b>7bg</b> (Photopyrone G) | S-31    |
| 23. References                                                                                                           | S32-S33 |
| 24. Correlated <sup>1</sup> H NMR and <sup>13</sup> C NMR Spectral data                                                  | S34-S73 |

**Table S1.** Correlation of Natural and Synthetic NMR Data of Compound **7ab** (Isogermicidin B):<sup>1</sup>

|                                                                                                                                                                       |                                                                                   |                                                                              |                                                                                       |
|-----------------------------------------------------------------------------------------------------------------------------------------------------------------------|-----------------------------------------------------------------------------------|------------------------------------------------------------------------------|---------------------------------------------------------------------------------------|
| 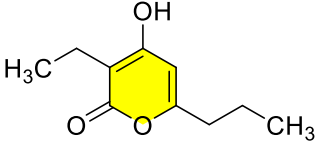 <p>3-ethyl-4-hydroxy-6-propyl-2H-pyran-2-one (<b>7ab</b>)<br/>(Isogermicidin B)</p> |                                                                                   | Isolated compound<br><sup>13</sup> C NMR<br>(125 MHz,<br>CD <sub>3</sub> OD) | Present synthetic<br>compound<br><sup>13</sup> C NMR (125<br>MHz, CD <sub>3</sub> OD) |
|                                                                                                                                                                       |                                                                                   | 168.9 (C)                                                                    | 168.8 (C)                                                                             |
|                                                                                                                                                                       |                                                                                   | 168.0 (C)                                                                    | 167.6 (C)                                                                             |
|                                                                                                                                                                       |                                                                                   | 165.0 (C)                                                                    | 165.0 (C)                                                                             |
|                                                                                                                                                                       |                                                                                   | 105.3 (C)                                                                    | 105.3 (C)                                                                             |
|                                                                                                                                                                       |                                                                                   | 101.6 (CH)                                                                   | 101.3 (CH)                                                                            |
| Isolated compound<br><sup>1</sup> H NMR<br>(500 MHz, CD <sub>3</sub> OD)                                                                                              | Present synthetic<br>compound <sup>1</sup> H NMR<br>(500 MHz, CD <sub>3</sub> OD) | 36.3 (CH <sub>2</sub> )                                                      | 36.3 (CH <sub>2</sub> )                                                               |
| 5.98 (1H, s)                                                                                                                                                          | 6.00 (1H, s)                                                                      | 21.4 (CH <sub>2</sub> )                                                      | 21.3 (CH <sub>2</sub> )                                                               |
| 2.44 (2H, t, <i>J</i> = 7.5 Hz)                                                                                                                                       | 2.46 (2H, t, <i>J</i> = 7.5 Hz)                                                   | 17.4 (CH <sub>2</sub> )                                                      | 17.3 (CH <sub>2</sub> )                                                               |
| 2.39 (2H, q, <i>J</i> = 7.5 Hz)                                                                                                                                       | 2.41 (2H, q, <i>J</i> = 7.5 Hz)                                                   | 13.8 (CH <sub>3</sub> )                                                      | 13.7 (CH <sub>3</sub> )                                                               |
| 1.67 (2H, m)                                                                                                                                                          | 1.69 (2H, sext, <i>J</i> = 7.5<br>Hz)                                             | 12.9 (CH <sub>3</sub> )                                                      | 12.9 (CH <sub>3</sub> )                                                               |
| 1.03 (3H, t, <i>J</i> = 7.4 Hz)                                                                                                                                       | 1.05 (3H, t, <i>J</i> = 7.5 Hz)                                                   |                                                                              |                                                                                       |
| 0.98 (3H, t, <i>J</i> = 7.4 Hz)                                                                                                                                       | 0.99 (3H, t, <i>J</i> = 7.5 Hz)                                                   |                                                                              |                                                                                       |

**Table S2.** Correlation of Natural and Synthetic NMR Data of Compound **7bb** (Isogermicidin A):<sup>1</sup>

|                                                                                                                                                                         |                                                                                   |                                                                              |                                                                                       |
|-------------------------------------------------------------------------------------------------------------------------------------------------------------------------|-----------------------------------------------------------------------------------|------------------------------------------------------------------------------|---------------------------------------------------------------------------------------|
| 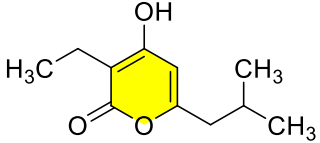 <p>3-ethyl-4-hydroxy-6-isobutyl-2H-pyran-2-one (<b>7bb</b>)<br/>(Isogermicidin A)</p> |                                                                                   | Isolated compound<br><sup>13</sup> C NMR<br>(125 MHz,<br>CD <sub>3</sub> OD) | Present synthetic<br>compound<br><sup>13</sup> C NMR (125<br>MHz, CD <sub>3</sub> OD) |
|                                                                                                                                                                         |                                                                                   | 168.9 (C)                                                                    | 168.8 (C)                                                                             |
|                                                                                                                                                                         |                                                                                   | 167.9 (C)                                                                    | 167.5 (C)                                                                             |
|                                                                                                                                                                         |                                                                                   | 164.3 (C)                                                                    | 164.3 (C)                                                                             |
|                                                                                                                                                                         |                                                                                   | 105.3 (C)                                                                    | 105.3 (C)                                                                             |
|                                                                                                                                                                         |                                                                                   | 102.5 (CH)                                                                   | 102.2 (CH)                                                                            |
| Isolated compound<br><sup>1</sup> H NMR<br>(500 MHz, CD <sub>3</sub> OD)                                                                                                | Present synthetic<br>compound <sup>1</sup> H NMR<br>(500 MHz, CD <sub>3</sub> OD) | 43.6 (CH <sub>2</sub> )                                                      | 43.5 (CH <sub>2</sub> )                                                               |
| 5.97 (1H, s)                                                                                                                                                            | 5.99 (1H, s)                                                                      | 28.3 (CH)                                                                    | 28.1 (CH)                                                                             |
| 2.39 (2H, q, <i>J</i> = 7.4 Hz)                                                                                                                                         | 2.42 (2H, q, <i>J</i> = 7.5 Hz)                                                   | 22.6 (2 x CH <sub>3</sub> )                                                  | 22.5 (2 x CH <sub>3</sub> )                                                           |
| 2.32 (2H, d, <i>J</i> = 7.2 Hz)                                                                                                                                         | 2.35 (2H, d, <i>J</i> = 7.0 Hz)                                                   | 17.4 (CH <sub>2</sub> )                                                      | 17.3 (CH <sub>2</sub> )                                                               |
| 2.03 (1H, m)                                                                                                                                                            | 2.05 (1H, nonet, <i>J</i> = 7.0<br>Hz)                                            | 12.9 (CH <sub>3</sub> )                                                      | 12.9 (CH <sub>3</sub> )                                                               |
| 1.04 (3H, t, <i>J</i> = 7.4 Hz)                                                                                                                                         | 1.05 (3H, t, <i>J</i> = 7.5 Hz)                                                   |                                                                              |                                                                                       |
| 0.96 (3H, d, <i>J</i> = 6.7 Hz)                                                                                                                                         | 0.98 (6H, d, <i>J</i> = 6.5 Hz)                                                   |                                                                              |                                                                                       |

|                            |  |  |
|----------------------------|--|--|
| 0.96 (3H, d, $J = 6.7$ Hz) |  |  |
|----------------------------|--|--|

**Table S3.** Correlation of Natural and Synthetic NMR Data of Compound **7bc** (Photopyrone A):<sup>2</sup>

| 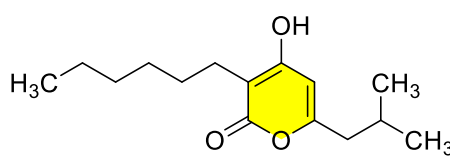<br>3-Hexyl-4-hydroxy-6-isobutyl-2H-pyran-2-one ( <b>7bc</b> )<br>(Photopyrone A) |                                                                                   | Isolated compound<br><sup>13</sup> C NMR<br>(125 MHz,<br>CD <sub>3</sub> OD) | Present synthetic<br>compound<br><sup>13</sup> C NMR (125<br>MHz, CD <sub>3</sub> OD) |            |
|---------------------------------------------------------------------------------------------------------------------------------------------------------------------|-----------------------------------------------------------------------------------|------------------------------------------------------------------------------|---------------------------------------------------------------------------------------|------------|
|                                                                                                                                                                     |                                                                                   |                                                                              | 174.1 (C)                                                                             | 168.3 (C)  |
|                                                                                                                                                                     |                                                                                   |                                                                              | 170.3 (C)                                                                             | 167.1 (C)  |
|                                                                                                                                                                     |                                                                                   |                                                                              | 164.0 (C)                                                                             | 163.7 (C)  |
|                                                                                                                                                                     |                                                                                   |                                                                              | 105.3 (CH)                                                                            | 103.5 (C)  |
|                                                                                                                                                                     |                                                                                   |                                                                              | 103.2 (C)                                                                             | 101.5 (CH) |
| Isolated compound<br><sup>1</sup> H NMR<br>(500 MHz, CD <sub>3</sub> OD)                                                                                            | Present synthetic<br>compound <sup>1</sup> H NMR<br>(500 MHz, CD <sub>3</sub> OD) | 43.1 (CH <sub>2</sub> )                                                      | 42.9 (CH <sub>2</sub> )                                                               |            |
| 5.91 (1H, s)                                                                                                                                                        | 5.94 (1H, s)                                                                      | 32.7 (CH <sub>2</sub> )                                                      | 32.4 (CH <sub>2</sub> )                                                               |            |
| 2.34 (2H, dd, $J = 7.8, 7.2$ Hz)                                                                                                                                    | 2.34 (2H, t, $J = 7.5$ Hz)                                                        | 30.0 (CH <sub>2</sub> )                                                      | 29.7 (CH <sub>2</sub> )                                                               |            |
| 2.27 (2H, d, $J = 7.2$ Hz)                                                                                                                                          | 2.29 (2H, d, $J = 7.5$ Hz)                                                        | 28.9 (CH <sub>2</sub> )                                                      | 28.4 (CH <sub>2</sub> )                                                               |            |
| 2.01 (1H, sept, $J = 7.0$ Hz)                                                                                                                                       | 2.00 (1H, nonet, $J = 6.5$ Hz)                                                    | 27.6 (CH)                                                                    | 27.6 (CH)                                                                             |            |

|                            |                                |                         |                         |
|----------------------------|--------------------------------|-------------------------|-------------------------|
| 1.43 (2H, m)               | 1.42 (2H, quint, $J = 7.0$ Hz) | 23.6 (CH <sub>2</sub> ) | 23.4 (CH <sub>2</sub> ) |
| 1.29 (2H, m)               | 1.32-1.24 (6H, m)              | 23.1 (CH <sub>2</sub> ) | 23.2 (CH <sub>2</sub> ) |
| 1.29 (2H, m)               |                                | 22.1 (CH <sub>3</sub> ) | 21.9 (CH <sub>3</sub> ) |
| 1.29 (1H, m)               |                                | 22.1 (CH <sub>3</sub> ) | 21.9 (CH <sub>3</sub> ) |
| 0.94 (3H, d, $J = 6.8$ Hz) | 0.92 (3H, d, $J = 7.0$ Hz)     | 13.9 (CH <sub>3</sub> ) | 13.9 (CH <sub>3</sub> ) |
| 0.94 (3H, d, $J = 6.8$ Hz) | 0.92 (3H, d, $J = 7.0$ Hz)     |                         |                         |
| 0.88 (3H, d, $J = 6.8$ Hz) | 0.86 (3H, t, $J = 6.0$ Hz)     |                         |                         |

**Table S4.** Correlation of Natural and Synthetic NMR Data of Compound **7cc** (Pseudopyronine A):<sup>3</sup>

| 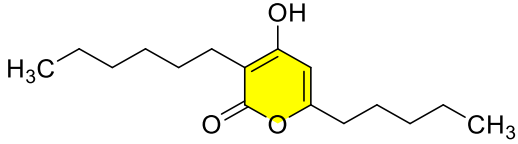<br>3-Hexyl-4-hydroxy-6-pentyl-2H-pyran-2-one ( <b>7cc</b> )<br>(Pseudopyrinone A) | Isolated compound<br><sup>13</sup> C NMR<br>(100 MHz, CD <sub>3</sub> OD) | Present synthetic<br>compound<br><sup>13</sup> C NMR (125<br>MHz, CD <sub>3</sub> OD) |            |
|-----------------------------------------------------------------------------------------------------------------------------------------------------------------------|---------------------------------------------------------------------------|---------------------------------------------------------------------------------------|------------|
|                                                                                                                                                                       |                                                                           | 168.8 (C)                                                                             | 169.1 (C)  |
|                                                                                                                                                                       |                                                                           | 167.7 (C)                                                                             | 168.0 (C)  |
|                                                                                                                                                                       |                                                                           | 165.1 (C)                                                                             | 165.4 (C)  |
|                                                                                                                                                                       |                                                                           | 103.9 (C)                                                                             | 104.2 (C)  |
|                                                                                                                                                                       |                                                                           | 101.0 (CH)                                                                            | 101.3 (CH) |

| Isolated compound<br><sup>1</sup> H NMR<br>(400 MHz, CD <sub>3</sub> OD) | Present synthetic<br>compound <sup>1</sup> H NMR<br>(500 MHz, CD <sub>3</sub> OD) |                         |                         |
|--------------------------------------------------------------------------|-----------------------------------------------------------------------------------|-------------------------|-------------------------|
|                                                                          |                                                                                   | 34.2 (CH <sub>2</sub> ) | 34.5 (CH <sub>2</sub> ) |
| 5.98 (1H, s)                                                             | 6.02 (1H, s)                                                                      | 32.9 (CH <sub>2</sub> ) | 33.2 (CH <sub>2</sub> ) |
| 2.46 (2H, t, <i>J</i> = 7.6 Hz)                                          | 2.50 (2H, t, <i>J</i> = 7.5 Hz)                                                   | 32.2 (CH <sub>2</sub> ) | 32.5 (CH <sub>2</sub> ) |
| 2.37 (2H, t, <i>J</i> = 7.5 Hz)                                          | 2.41 (2H, t, <i>J</i> = 8.0 Hz)                                                   | 30.2 (CH <sub>2</sub> ) | 30.5 (CH <sub>2</sub> ) |
| 1.70-1.60 (2H, m)                                                        | 1.69 (2H, quint, <i>J</i> = 7.5<br>Hz)                                            | 29.0 (CH <sub>2</sub> ) | 29.2 (CH <sub>2</sub> ) |
| 1.50-1.40 (2H, m)                                                        | 1.49 (2H, quint, <i>J</i> = 7.5<br>Hz)                                            | 27.6 (CH <sub>2</sub> ) | 27.9 (CH <sub>2</sub> ) |
| 1.40-1.32 (10H, m)                                                       | 1.44-1.33 (10H, m)                                                                | 23.9 (CH <sub>2</sub> ) | 24.1 (CH <sub>2</sub> ) |
| 0.92 (3H, t, <i>J</i> = 7.0 Hz)                                          | 0.96 (3H, t, <i>J</i> = 7.5 Hz)                                                   | 23.7 (CH <sub>2</sub> ) | 23.9 (CH <sub>2</sub> ) |
| 0.89 (3H, t, <i>J</i> = 7.0 Hz)                                          | 0.93 (3H, t, <i>J</i> = 6.5 Hz)                                                   | 23.4 (CH <sub>2</sub> ) | 23.6 (CH <sub>2</sub> ) |
|                                                                          |                                                                                   | 14.4 (CH <sub>3</sub> ) | 14.7 (CH <sub>3</sub> ) |
|                                                                          |                                                                                   | 14.2 (CH <sub>3</sub> ) | 14.5 (CH <sub>3</sub> ) |
|                                                                          |                                                                                   |                         |                         |

**Table S5.** Correlation of Natural and Synthetic NMR Data of Compound **7gc** (Pseudopyronine B):<sup>4</sup>

|                                                                                                                                                                                |                                                                                             |                                                                                     |                                                                                                 |
|--------------------------------------------------------------------------------------------------------------------------------------------------------------------------------|---------------------------------------------------------------------------------------------|-------------------------------------------------------------------------------------|-------------------------------------------------------------------------------------------------|
| 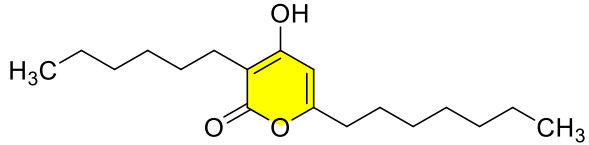 <p>6-heptyl-3-hexyl-4-hydroxy-2<i>H</i>-pyran-2-one (<b>7gc</b>)<br/>(Pseudopyronine B)</p> |                                                                                             | Isolated compound<br><sup>13</sup> C NMR<br>(100 MHz, DMSO- <i>d</i> <sub>6</sub> ) | Present synthetic<br>compound<br><sup>13</sup> C NMR (125<br>MHz, DMSO- <i>d</i> <sub>6</sub> ) |
|                                                                                                                                                                                |                                                                                             | 165.0 (C)                                                                           | 164.8 (C)                                                                                       |
|                                                                                                                                                                                |                                                                                             | 164.8 (C)                                                                           | 164.8 (C)                                                                                       |
|                                                                                                                                                                                |                                                                                             | 162.6 (C)                                                                           | 162.7 (C)                                                                                       |
|                                                                                                                                                                                |                                                                                             | 101.3 (C)                                                                           | 101.4 (C)                                                                                       |
|                                                                                                                                                                                |                                                                                             | 99.2 (CH)                                                                           | 99.2 (CH)                                                                                       |
| Isolated compound<br><sup>1</sup> H NMR<br>(400 MHz, DMSO- <i>d</i> <sub>6</sub> )                                                                                             | Present synthetic<br>compound <sup>1</sup> H NMR<br>(500 MHz, DMSO- <i>d</i> <sub>6</sub> ) | 32.6 (CH <sub>2</sub> )                                                             | 32.6 (CH <sub>2</sub> )                                                                         |
|                                                                                                                                                                                | 11.02 (1H, br s)                                                                            | 31.2 (CH <sub>2</sub> )                                                             | 31.16 (CH <sub>2</sub> )                                                                        |
| 5.94 (1H, s)                                                                                                                                                                   | 5.96 (1H, s)                                                                                | 31.1 (CH <sub>2</sub> )                                                             | 31.11 (CH <sub>2</sub> )                                                                        |
| 2.37 (2H, t, <i>J</i> = 8.0 Hz)                                                                                                                                                | 2.39 (2H, t, <i>J</i> = 7.5 Hz)                                                             | 28.6 (CH <sub>2</sub> )                                                             | 28.5 (CH <sub>2</sub> )                                                                         |
| 2.24 (2H, t, <i>J</i> = 8.0 Hz)                                                                                                                                                | 2.24 (2H, t, <i>J</i> = 7.5 Hz)                                                             | 28.6 (CH <sub>2</sub> )                                                             | 28.3 (CH <sub>2</sub> )                                                                         |
| 1.51 (2H, t, <i>J</i> = 8.0 Hz)                                                                                                                                                | 1.52 (2H, quint, <i>J</i> = 7.0<br>Hz)                                                      | 28.2 (CH <sub>2</sub> )                                                             | 28.2 (CH <sub>2</sub> )                                                                         |
| 1.35 (2H, t, <i>J</i> = 8.0 Hz)                                                                                                                                                | 1.35 (2H, quint, <i>J</i> = 7.0                                                             | 27.5 (CH <sub>2</sub> )                                                             | 27.5 (CH <sub>2</sub> )                                                                         |



|              |                    |                         |                          |
|--------------|--------------------|-------------------------|--------------------------|
|              | Hz)                |                         |                          |
| 1.28 (2H, m) | 1.31-1.17 (14H, m) | 26.2 (CH <sub>2</sub> ) | 26.2 (CH <sub>2</sub> )  |
| 1.26 (2H, m) |                    | 22.7 (CH <sub>2</sub> ) | 22.6 (CH <sub>2</sub> )  |
| 1.26 (2H, m) |                    | 22.0 (CH <sub>2</sub> ) | 22.05 (CH <sub>2</sub> ) |
| 1.26 (2H, m) |                    | 22.0 (CH <sub>2</sub> ) | 22.02 (CH <sub>2</sub> ) |
| 1.26 (2H, m) |                    | 14.0 (CH <sub>3</sub> ) | 13.9 (CH <sub>3</sub> )  |
| 1.25 (2H, m) |                    | 13.8 (CH <sub>3</sub> ) | 13.9 (CH <sub>3</sub> )  |
| 1.25 (2H, m) |                    |                         |                          |
| 0.84 (3H, m) |                    | 0.97-0.73 (6H, m)       |                          |
| 0.84 (3H, m) |                    |                         |                          |

**Table S6.** Correlation of Natural and Synthetic NMR Data of Compound **7jc** (Pseudopyronine C):<sup>4</sup>

|                                                                                                                                                                          |                                                                               |                                                                                        |
|--------------------------------------------------------------------------------------------------------------------------------------------------------------------------|-------------------------------------------------------------------------------|----------------------------------------------------------------------------------------|
| 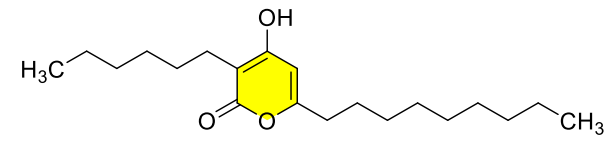 <p>3-Hexyl-4-hydroxy-6-nonyl-2H-pyran-2-one (<b>7jc</b>)<br/>(Pseudopyrinone C)</p> | Isolated compound <sup>13</sup> C NMR (100 MHz, DMSO- <i>d</i> <sub>6</sub> ) | Present synthetic compound <sup>13</sup> C NMR (100 MHz, DMSO- <i>d</i> <sub>6</sub> ) |
|                                                                                                                                                                          | 166.9 (C)                                                                     | 164.7 (C)                                                                              |
|                                                                                                                                                                          | 165.1 (C)                                                                     | 164.7 (C)                                                                              |

|                                                                                    |                                                                                             |                         |                          |
|------------------------------------------------------------------------------------|---------------------------------------------------------------------------------------------|-------------------------|--------------------------|
|                                                                                    |                                                                                             | 162.0 (C)               | 162.7 (C)                |
|                                                                                    |                                                                                             | 101.5 (C)               | 101.3 (C)                |
|                                                                                    |                                                                                             | 100.4 (CH)              | 99.2 (CH)                |
| Isolated compound<br><sup>1</sup> H NMR<br>(400 MHz, DMSO- <i>d</i> <sub>6</sub> ) | Present synthetic<br>compound <sup>1</sup> H NMR<br>(500 MHz, DMSO- <i>d</i> <sub>6</sub> ) | 32.6 (CH <sub>2</sub> ) | 32.5 (CH <sub>2</sub> )  |
|                                                                                    | 11.01 (1H, br s)                                                                            | 31.2 (CH <sub>2</sub> ) | 31.2 (CH <sub>2</sub> )  |
| 5.86 (1H, s)                                                                       | 5.98 (1H, s)                                                                                | 31.2 (CH <sub>2</sub> ) | 31.1 (CH <sub>2</sub> )  |
| 2.34 (2H, t, <i>J</i> =<br>8.0Hz)                                                  | 2.41 (2H, t, <i>J</i> = 7.5<br>Hz)                                                          | 28.8 (CH <sub>2</sub> ) | 28.8 (CH <sub>2</sub> )  |
| 2.22 (2H, t, <i>J</i> = 8.0<br>Hz)                                                 | 2.26 (2H, t, <i>J</i> = 7.5<br>Hz)                                                          | 28.6 (CH <sub>2</sub> ) | 28.62 (CH <sub>2</sub> ) |
| 1.50 (2H, t, <i>J</i> = 8.0<br>Hz)                                                 | 1.54 (2H, quint, <i>J</i> =<br>6.5 Hz)                                                      | 28.6 (CH <sub>2</sub> ) | 28.6 (CH <sub>2</sub> )  |
| 1.34 (2H, t, <i>J</i> = 8.0<br>Hz)                                                 | 1.38 (2H, quint, <i>J</i> =<br>6.5 Hz)                                                      | 28.6 (CH <sub>2</sub> ) | 28.5 (CH <sub>2</sub> )  |
| 1.28 (2H, m)                                                                       |                                                                                             | 28.2 (CH <sub>2</sub> ) | 28.2 (CH <sub>2</sub> )  |

|              |                    |                         |                          |
|--------------|--------------------|-------------------------|--------------------------|
| 1.28 (2H, m) | 1.28-1.23 (18H, m) | 27.7 (CH <sub>2</sub> ) | 27.4 (CH <sub>2</sub> )  |
| 1.26 (2H, m) |                    | 26.2 (CH <sub>2</sub> ) | 26.2 (CH <sub>2</sub> )  |
| 1.26 (2H, m) |                    | 22.8 (CH <sub>2</sub> ) | 22.6 (CH <sub>2</sub> )  |
| 1.26 (2H, m) |                    | 22.1 (CH <sub>2</sub> ) | 22.05 (CH <sub>2</sub> ) |
| 1.26 (2H, m) |                    | 22.1 (CH <sub>2</sub> ) | 22.03 (CH <sub>2</sub> ) |
| 1.25 (2H, m) |                    | 13.9 (CH <sub>3</sub> ) | 13.9 (CH <sub>3</sub> )  |
| 1.24 (2H, m) |                    | 13.9 (CH <sub>3</sub> ) | 13.9 (CH <sub>3</sub> )  |
| 1.23 (2H, m) |                    |                         |                          |
| 0.85 (3H, m) | 0.96-0.78 (6H, m)  |                         |                          |
| 0.85 (3H, m) |                    |                         |                          |

**Table S7.** Correlation of Natural and Synthetic NMR Data of Compound **7bd** (Photopyrone B):<sup>2</sup>

| 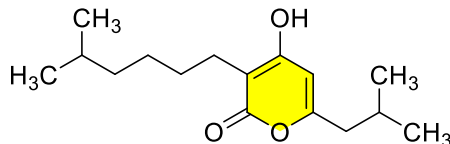<br>4-Hydroxy-6-isobutyl-3-(5-methylhexyl)-2H-pyran-2-one ( <b>7bd</b> )<br>(Photopyrone B) | Isolated compound<br><sup>13</sup> C NMR<br>(125 MHz, CD <sub>3</sub> OD) | Present synthetic<br>compound<br><sup>13</sup> C NMR (100<br>MHz, CD <sub>3</sub> OD) |           |
|---------------------------------------------------------------------------------------------------------------------------------------------------------------------------------|---------------------------------------------------------------------------|---------------------------------------------------------------------------------------|-----------|
|                                                                                                                                                                                 |                                                                           | 167.6 (C)                                                                             | 167.5 (C) |
|                                                                                                                                                                                 |                                                                           | 166.9 (C)                                                                             | 166.3 (C) |
|                                                                                                                                                                                 |                                                                           | 162.7 (C)                                                                             | 162.8 (C) |

|                                                                          |                                                                                   |                         |                         |
|--------------------------------------------------------------------------|-----------------------------------------------------------------------------------|-------------------------|-------------------------|
|                                                                          |                                                                                   | 102.4 (C)               | 102.5 (C)               |
|                                                                          |                                                                                   | 101.0 (CH)              | 100.6 (CH)              |
| Isolated compound<br><sup>1</sup> H NMR<br>(500 MHz, CD <sub>3</sub> OD) | Present synthetic<br>compound <sup>1</sup> H NMR<br>(500 MHz, CD <sub>3</sub> OD) | 42.0 (CH <sub>2</sub> ) | 42.0 (CH <sub>2</sub> ) |
| 5.96 (1H, s)                                                             | 5.97 (1H, s)                                                                      | 38.7 (CH <sub>2</sub> ) | 38.6 (CH <sub>2</sub> ) |
| 2.37 (2H, dd, <i>J</i> = 7.6, 7.3 Hz)                                    | 2.37 (2H, t, <i>J</i> = 8.0 Hz)                                                   | 27.9 (CH <sub>2</sub> ) | 27.8 (CH <sub>2</sub> ) |
| 2.31 (2H, d, <i>J</i> = 7.0 Hz)                                          | 2.33 (2H, d, <i>J</i> = 7.5 Hz)                                                   | 27.7 (CH)               | 27.7 (CH)               |
| 2.02 (1H, sept, <i>J</i> = 7.0 Hz)                                       | 2.03 (1H, nonet, <i>J</i> = 7.0 Hz)                                               | 26.9 (CH <sub>2</sub> ) | 26.9 (CH <sub>2</sub> ) |
| 1.52 (1H, sept, <i>J</i> = 6.7 Hz)                                       | 1.52 (1H, nonet, <i>J</i> = 6.5 Hz)                                               | 26.7 (CH)               | 26.7 (CH)               |
| 1.43 (2H, m)                                                             | 1.44 (2H, quint, <i>J</i> = 7.5 Hz)                                               | 22.5 (CH <sub>2</sub> ) | 22.5 (CH <sub>2</sub> ) |
| 1.31 (2H, m)                                                             | 1.36-1.28 (2H, m)                                                                 | 21.6 (CH <sub>3</sub> ) | 21.6 (CH <sub>3</sub> ) |
| 1.19 (2H, m)                                                             | 1.20 (2H, q, <i>J</i> = 6.5 Hz)                                                   | 21.6 (CH <sub>3</sub> ) | 21.6 (CH <sub>3</sub> ) |
| 0.94 (3H, d, <i>J</i> = 6.7 Hz)                                          | 0.95 (6H, d, <i>J</i> = 7.0 Hz)                                                   | 21.0 (CH <sub>3</sub> ) | 21.1 (CH <sub>3</sub> ) |
| 0.94 (3H, d, <i>J</i> = 6.7 Hz)                                          |                                                                                   | 21.0 (CH <sub>3</sub> ) | 21.1 (CH <sub>3</sub> ) |

|                            |                            |  |  |
|----------------------------|----------------------------|--|--|
| 0.86 (3H, d, $J = 6.7$ Hz) | 0.87 (6H, d, $J = 6.5$ Hz) |  |  |
| 0.86 (3H, d, $J = 6.7$ Hz) |                            |  |  |

**Table S8.** Correlation of Natural and Synthetic NMR Data of Compound **7bh** (Germicidin I):<sup>5</sup>

| 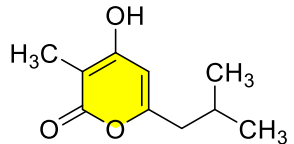<br>4-Hydroxy-6-isobutyl-3-methyl-2H-pyran-2-one ( <b>7bh</b> )<br>(Germicidin I) |                                                                                             | Isolated compound<br><sup>13</sup> C NMR<br>(125 MHz, DMSO- <i>d</i> <sub>6</sub> ) | Present synthetic<br>compound<br><sup>13</sup> C NMR (100<br>MHz, DMSO- <i>d</i> <sub>6</sub> ) |
|--------------------------------------------------------------------------------------------------------------------------------------------------------------------|---------------------------------------------------------------------------------------------|-------------------------------------------------------------------------------------|-------------------------------------------------------------------------------------------------|
|                                                                                                                                                                    |                                                                                             | 168.0 (C)                                                                           | 165.1 (C)                                                                                       |
|                                                                                                                                                                    |                                                                                             | 165.4 (C)                                                                           | 164.7 (C)                                                                                       |
|                                                                                                                                                                    |                                                                                             | 160.3 (C)                                                                           | 161.6 (C)                                                                                       |
|                                                                                                                                                                    |                                                                                             | 101.9 (CH)                                                                          | 100.2 (CH)                                                                                      |
|                                                                                                                                                                    |                                                                                             | 94.7 (C)                                                                            | 96.6 (C)                                                                                        |
| Isolated compound<br><sup>1</sup> H NMR<br>(500 MHz, DMSO- <i>d</i> <sub>6</sub> )                                                                                 | Present synthetic<br>compound <sup>1</sup> H NMR<br>(500 MHz, DMSO- <i>d</i> <sub>6</sub> ) | 41.6 (CH <sub>2</sub> )                                                             | 41.6 (CH <sub>2</sub> )                                                                         |
|                                                                                                                                                                    | 11.12 (1H, br s, OH)                                                                        | 26.0 (CH)                                                                           | 26.4 (CH)                                                                                       |
| 5.86 (1H, s)                                                                                                                                                       | 5.97 (1H, s)                                                                                | 21.7 (CH <sub>3</sub> )                                                             | 21.9 (CH <sub>3</sub> )                                                                         |
| 2.21 (2H, d, $J = 6.5$ Hz)                                                                                                                                         | 2.28 (2H, d, $J = 7.0$ Hz)                                                                  | 21.7 (CH <sub>3</sub> )                                                             | 21.9 (CH <sub>3</sub> )                                                                         |
| 1.89 (1H, m)                                                                                                                                                       | 1.91 (1H, nonet, $J = 7.0$ )                                                                | 8.4 (CH <sub>3</sub> )                                                              | 8.4 (CH <sub>3</sub> )                                                                          |

|                            |                            |  |  |
|----------------------------|----------------------------|--|--|
|                            | Hz)                        |  |  |
| 1.69 (3H, s)               | 1.74 (3H, s)               |  |  |
| 0.88 (3H, d, $J = 6.5$ Hz) | 0.88 (6H, d, $J = 6.5$ Hz) |  |  |
| 0.88 (3H, d, $J = 6.5$ Hz) |                            |  |  |

**Table S9.** Correlation of Natural and Synthetic NMR Data of Compound **7ch** (Violapyrone L):<sup>6</sup>

|                                                                                                                                                                       |                                                                                             |                                                                                                 |                         |
|-----------------------------------------------------------------------------------------------------------------------------------------------------------------------|---------------------------------------------------------------------------------------------|-------------------------------------------------------------------------------------------------|-------------------------|
| 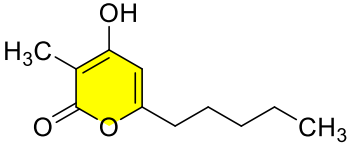 <p>4-Hydroxy-3-methyl-6-pentyl-2H-pyran-2-one (<b>7ch</b>)<br/>(Violapyrone L)</p> | Isolated compound<br><sup>13</sup> C NMR<br>(125 MHz, DMSO- <i>d</i> <sub>6</sub> )         | Present synthetic<br>compound<br><sup>13</sup> C NMR (125<br>MHz, DMSO- <i>d</i> <sub>6</sub> ) |                         |
|                                                                                                                                                                       | 165.2 (C)                                                                                   | 167.7 (C)                                                                                       |                         |
|                                                                                                                                                                       | 165.0 (C)                                                                                   | 167.1 (C)                                                                                       |                         |
|                                                                                                                                                                       | 163.2 (C)                                                                                   | 164.2 (C)                                                                                       |                         |
|                                                                                                                                                                       | 99.6 (CH)                                                                                   | 100.6 (CH)                                                                                      |                         |
|                                                                                                                                                                       | 96.3 (C)                                                                                    | 97.7 (C)                                                                                        |                         |
| Isolated compound<br><sup>1</sup> H NMR<br>(500 MHz, DMSO- <i>d</i> <sub>6</sub> )                                                                                    | Present synthetic<br>compound <sup>1</sup> H NMR<br>(500 MHz, DMSO- <i>d</i> <sub>6</sub> ) |                                                                                                 |                         |
| 5.98 (1H, s)                                                                                                                                                          | 5.98 (1H, s)                                                                                | 32.9 (CH <sub>2</sub> )                                                                         | 33.1 (CH <sub>2</sub> ) |
| 2.40 (2H, t, $J = 7.5$ Hz)                                                                                                                                            | 2.36 (2H, t, $J = 7.5$ Hz)                                                                  | 30.8 (CH <sub>2</sub> )                                                                         | 30.9 (CH <sub>2</sub> ) |
|                                                                                                                                                                       |                                                                                             | 26.3 (CH <sub>2</sub> )                                                                         | 26.5 (CH <sub>2</sub> ) |

|                                       |                                       |                         |                         |
|---------------------------------------|---------------------------------------|-------------------------|-------------------------|
| 1.74 (3H, s)                          | 1.70 (3H, s)                          | 22.1 (CH <sub>2</sub> ) | 22.3 (CH <sub>2</sub> ) |
| 1.53 (2H, quintet, <i>J</i> = 7.5 Hz) | 1.48 (2H, quintet, <i>J</i> = 7.5 Hz) | 14.1 (CH <sub>3</sub> ) | 14.3 (CH <sub>3</sub> ) |
| 1.29 (2H, m)                          | 1.25-1.14 (4H, m)                     | 8.7 (CH <sub>3</sub> )  | 8.7 (CH <sub>3</sub> )  |
| 1.27 (2H, m)                          |                                       |                         |                         |
| 0.88 (3H, t, <i>J</i> = 7.1 Hz)       | 0.78 (3H, t, <i>J</i> = 7.0 Hz)       |                         |                         |
|                                       |                                       |                         |                         |

**Table S10.** Correlation of Natural and Synthetic NMR Data of Compound **7dh** (Violapyrone J1):<sup>7</sup>

|                                                                                                                                                                           |                                                                              |                                                                                       |
|---------------------------------------------------------------------------------------------------------------------------------------------------------------------------|------------------------------------------------------------------------------|---------------------------------------------------------------------------------------|
| 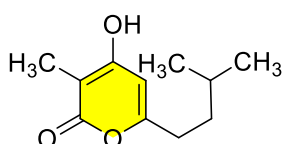 <p>4-Hydroxy-6-isopentyl-3-methyl-2H-pyran-2-one (<b>7dh</b>)<br/>(Violapyrone J1)</p> | Isolated compound<br><sup>13</sup> C NMR<br>(150 MHz,<br>CD <sub>3</sub> OD) | Present synthetic<br>compound<br><sup>13</sup> C NMR (100<br>MHz, CD <sub>3</sub> OD) |
|                                                                                                                                                                           | 169.3 (C)                                                                    | 169.4 (C)                                                                             |
|                                                                                                                                                                           | 168.4 (C)                                                                    | 168.2 (C)                                                                             |
|                                                                                                                                                                           | 165.1 (C)                                                                    | 165.4 (C)                                                                             |
|                                                                                                                                                                           | 101.1 (CH)                                                                   | 101.1 (CH)                                                                            |
|                                                                                                                                                                           | 98.8 (C)                                                                     | 99.2 (C)                                                                              |
| Isolated compound<br><sup>1</sup> H NMR                                                                                                                                   | Present synthetic<br>compound <sup>1</sup> H NMR                             |                                                                                       |
|                                                                                                                                                                           | 37.1 (CH <sub>2</sub> )                                                      | 37.3 (CH <sub>2</sub> )                                                               |

|                                 |                                     |                             |                             |
|---------------------------------|-------------------------------------|-----------------------------|-----------------------------|
| (600 MHz, CD <sub>3</sub> OD)   | (500 MHz, CD <sub>3</sub> OD)       |                             |                             |
| 5.98 (1H, s)                    | 5.90 (1H, s)                        | 32.2 (CH <sub>2</sub> )     | 32.6 (CH <sub>2</sub> )     |
| 2.47 (2H, t, <i>J</i> = 7.8 Hz) | 2.39 (2H, t, <i>J</i> = 8.0 Hz)     | 28.3 (CH)                   | 28.9 (CH)                   |
| 1.83 (3H, s)                    | 1.75 (3H, s)                        | 22.3 (2 x CH <sub>3</sub> ) | 22.9 (2 x CH <sub>3</sub> ) |
| 1.58 (1H, m)                    | 1.50 (1H, nonet, <i>J</i> = 6.5 Hz) | 8.3 (CH <sub>3</sub> )      | 8.5 (CH <sub>3</sub> )      |
| 1.53 (2H, m)                    | 1.46-1.40 (2H, m)                   |                             |                             |
| 0.95 (6H, d, <i>J</i> = 6.6 Hz) | 0.84 (6H, d, <i>J</i> = 6.5 Hz)     |                             |                             |
|                                 |                                     |                             |                             |

**Table S11.** Correlation of Natural and Synthetic NMR Data of Compound **7eh** (Violapyrone J):<sup>8</sup>

|                                                                                                                                                                               |                                                                                                  |                                                                                                 |
|-------------------------------------------------------------------------------------------------------------------------------------------------------------------------------|--------------------------------------------------------------------------------------------------|-------------------------------------------------------------------------------------------------|
| 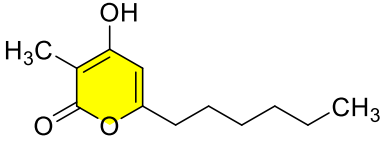 <p>6-Hexyl-4-hydroxy-3-methyl-2<i>H</i>-pyran-2-one (<b>7eh</b>)<br/>(Violapyrone J)</p> | Isolated compound<br><sup>13</sup> C NMR<br>(125 MHz, DMSO- <i>d</i> <sub>6</sub> ) <sup>7</sup> | Present synthetic<br>compound<br><sup>13</sup> C NMR (125<br>MHz, DMSO- <i>d</i> <sub>6</sub> ) |
|                                                                                                                                                                               | 166.7 (C)                                                                                        | 165.1 (C)                                                                                       |
|                                                                                                                                                                               | 165.2 (C)                                                                                        | 164.8 (C)                                                                                       |
|                                                                                                                                                                               | 161.9 (C)                                                                                        | 162.5 (C)                                                                                       |
|                                                                                                                                                                               | 100.2 (CH)                                                                                       | 99.2 (CH)                                                                                       |



|                                                                                    |                                                                                             |                         |                         |
|------------------------------------------------------------------------------------|---------------------------------------------------------------------------------------------|-------------------------|-------------------------|
|                                                                                    |                                                                                             | 95.5 (C)                | 96.5 (C)                |
| Isolated compound<br><sup>1</sup> H NMR<br>(500 MHz, DMSO- <i>d</i> <sub>6</sub> ) | Present synthetic<br>compound <sup>1</sup> H NMR<br>(500 MHz, DMSO- <i>d</i> <sub>6</sub> ) | 32.6 (CH <sub>2</sub> ) | 32.6 (CH <sub>2</sub> ) |
|                                                                                    | 11.09 (1H, br s)                                                                            | 30.9 (CH <sub>2</sub> ) | 30.9 (CH <sub>2</sub> ) |
| 5.91 (1H, br s)                                                                    | 5.97 (1H, s)                                                                                | 27.6 (CH <sub>2</sub> ) | 27.9 (CH <sub>2</sub> ) |
| 2.37 (2H, t, <i>J</i> = 7.5 Hz)                                                    | 2.39 (2H, t, <i>J</i> = 7.5 Hz)                                                             | 26.1 (CH <sub>2</sub> ) | 26.2 (CH <sub>2</sub> ) |
| 1.71 (3H, s)                                                                       | 1.73 (3H, s)                                                                                | 21.7 (CH <sub>2</sub> ) | 21.9 (CH <sub>2</sub> ) |
| 1.51(2H, m)                                                                        | 1.51 (2H, quint, <i>J</i> = 7.5<br>Hz)                                                      | 13.7 (CH <sub>3</sub> ) | 13.8 (CH <sub>3</sub> ) |
| 1.27 (2H, m)                                                                       | 1.32-1.19 (6H, m)                                                                           | 8.3 (CH <sub>3</sub> )  | 8.3 (CH <sub>3</sub> )  |
| 1.26 (2H, m)                                                                       |                                                                                             |                         |                         |
| 1.26 (2H, m)                                                                       |                                                                                             |                         |                         |
| 0.85 (3H, t, <i>J</i> = 6.5 Hz)                                                    | 0.84 (3H, t, <i>J</i> = 7.0 Hz)                                                             |                         |                         |
|                                                                                    |                                                                                             |                         |                         |

**Table S12.** Correlation of Natural and Synthetic NMR Data of Compound **7fh** (Violapyrone A):<sup>9</sup>

|                                                                                                                                                                                             |                                                                                             |                                                                                     |                                                                                                 |
|---------------------------------------------------------------------------------------------------------------------------------------------------------------------------------------------|---------------------------------------------------------------------------------------------|-------------------------------------------------------------------------------------|-------------------------------------------------------------------------------------------------|
| 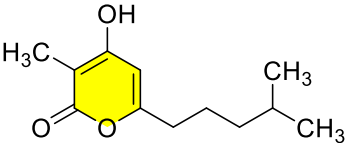 <p>4-Hydroxy-3-methyl-6-(4-methylpentyl)-<br/>2<i>H</i>-pyran-2-one (<b>7fh</b>)<br/>(Violapyrone A)</p> |                                                                                             | Isolated compound<br><sup>13</sup> C NMR<br>(150 MHz, DMSO- <i>d</i> <sub>6</sub> ) | Present synthetic<br>compound<br><sup>13</sup> C NMR (125<br>MHz, DMSO- <i>d</i> <sub>6</sub> ) |
|                                                                                                                                                                                             |                                                                                             | 165.6 (C)                                                                           | 165.1 (C)                                                                                       |
|                                                                                                                                                                                             |                                                                                             | 165.5 (C)                                                                           | 164.8 (C)                                                                                       |
|                                                                                                                                                                                             |                                                                                             | 162.9 (C)                                                                           | 162.5 (C)                                                                                       |
|                                                                                                                                                                                             |                                                                                             | 99.8 (CH)                                                                           | 99.2 (CH)                                                                                       |
|                                                                                                                                                                                             |                                                                                             | 96.9 (C)                                                                            | 96.5 (C)                                                                                        |
| Isolated compound<br><sup>1</sup> H NMR<br>(600 MHz, DMSO- <i>d</i> <sub>6</sub> )                                                                                                          | Present synthetic<br>compound <sup>1</sup> H NMR<br>(500 MHz, DMSO- <i>d</i> <sub>6</sub> ) | 38.0 (CH <sub>2</sub> )                                                             | 37.5 (CH <sub>2</sub> )                                                                         |
| 5.96 (1H, s)                                                                                                                                                                                | 5.95 (1H, s)                                                                                | 33.2 (CH <sub>2</sub> )                                                             | 32.8 (CH <sub>2</sub> )                                                                         |
| 2.37 (2H, t, <i>J</i> = 7.3 Hz)                                                                                                                                                             | 2.36 (2H, t, <i>J</i> = 7.5 Hz)                                                             | 27.7 (CH)                                                                           | 27.2 (CH)                                                                                       |
| 1.72 (3H, s)                                                                                                                                                                                | 1.71 (3H, s)                                                                                | 24.6 (CH <sub>2</sub> )                                                             | 24.2 (CH <sub>2</sub> )                                                                         |
| 1.51 (2H, m)                                                                                                                                                                                | 1.54-1.45 (3H, m)                                                                           | 22.8 (2 x CH <sub>3</sub> )                                                         | 22.4 (2 x CH <sub>3</sub> )                                                                     |
| 1.50 (1H, m)                                                                                                                                                                                |                                                                                             | 8.8 (CH <sub>3</sub> )                                                              | 8.3 (CH <sub>3</sub> )                                                                          |
| 1.15 (2H, q, <i>J</i> = 6.9 Hz)                                                                                                                                                             | 1.14 (2H, q, <i>J</i> = 7.0 Hz)                                                             |                                                                                     |                                                                                                 |

|                            |                            |  |  |
|----------------------------|----------------------------|--|--|
| 0.84 (6H, d, $J = 6.6$ Hz) | 0.83 (6H, d, $J = 6.5$ Hz) |  |  |
|----------------------------|----------------------------|--|--|

**Table S13.** Correlation of Natural and Synthetic NMR Data of Compound **7gh** (Violapyrone I):<sup>11</sup>

| 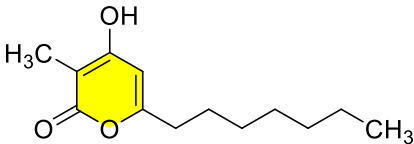 <p>6-Heptyl-4-hydroxy-3-methyl-2H-pyran-2-one (<b>7gh</b>)<br/>(Violapyrone I)</p> |                                                                                   | Isolated compound<br><sup>13</sup> C NMR<br>(125 MHz,<br>CD <sub>3</sub> OD) | Present synthetic<br>compound<br><sup>13</sup> C NMR (100<br>MHz, CD <sub>3</sub> OD) |            |
|-----------------------------------------------------------------------------------------------------------------------------------------------------------------------|-----------------------------------------------------------------------------------|------------------------------------------------------------------------------|---------------------------------------------------------------------------------------|------------|
|                                                                                                                                                                       |                                                                                   |                                                                              | 169.2 (C)                                                                             | 169.2 (C)  |
|                                                                                                                                                                       |                                                                                   |                                                                              | 168.0 (C)                                                                             | 167.9 (C)  |
|                                                                                                                                                                       |                                                                                   |                                                                              | 165.0 (C)                                                                             | 165.0 (C)  |
|                                                                                                                                                                       |                                                                                   |                                                                              | 101.1 (CH)                                                                            | 101.1 (CH) |
|                                                                                                                                                                       |                                                                                   |                                                                              | 99.0 (C)                                                                              | 99.1 (C)   |
| Isolated compound<br><sup>1</sup> H NMR<br>(500 MHz, CD <sub>3</sub> OD)                                                                                              | Present synthetic<br>compound <sup>1</sup> H NMR<br>(500 MHz, CD <sub>3</sub> OD) |                                                                              |                                                                                       |            |
| 5.99 (1H, s)                                                                                                                                                          | 5.99 (1H, s)                                                                      | 34.4 (CH <sub>2</sub> )                                                      | 34.4 (CH <sub>2</sub> )                                                               |            |
| 2.48-2.45 (2H, t, $J = 8.1$ Hz)                                                                                                                                       | 2.47 (2H, t, $J = 7.5$ Hz)                                                        | 33.0 (CH <sub>2</sub> )                                                      | 32.9 (CH <sub>2</sub> )                                                               |            |
| 1.85 (3H, s)                                                                                                                                                          | 1.85 (3H, s)                                                                      | 30.2 (CH <sub>2</sub> )                                                      | 30.2 (CH <sub>2</sub> )                                                               |            |
| 1.65-1.62 (2H, m)                                                                                                                                                     | 1.69-1.59 (2H, m)                                                                 | 30.1 (CH <sub>2</sub> )                                                      | 30.1 (CH <sub>2</sub> )                                                               |            |
|                                                                                                                                                                       |                                                                                   | 28.1 (CH <sub>2</sub> )                                                      | 28.1 (CH <sub>2</sub> )                                                               |            |

|                                      |                                 |                         |                         |
|--------------------------------------|---------------------------------|-------------------------|-------------------------|
| 1.35-1.30 (8H, m)                    | 1.38-1.27 (8H, m)               | 23.8 (CH <sub>2</sub> ) | 23.8 (CH <sub>2</sub> ) |
| 0.91-0.89 (3H, t, <i>J</i> = 6.9 Hz) | 0.90 (3H, t, <i>J</i> = 7.0 Hz) | 14.6 (CH <sub>3</sub> ) | 14.5 (CH <sub>3</sub> ) |
|                                      |                                 | 8.4 (CH <sub>3</sub> )  | 8.4 (CH <sub>3</sub> )  |
|                                      |                                 |                         |                         |

**Table S14.** Correlation of Natural and Synthetic NMR Data of Compound **7hh** (Violapyrone B):<sup>9</sup>

|                                                                                                                                                                                            |                                                                                                  |                                                                                                 |                         |
|--------------------------------------------------------------------------------------------------------------------------------------------------------------------------------------------|--------------------------------------------------------------------------------------------------|-------------------------------------------------------------------------------------------------|-------------------------|
| 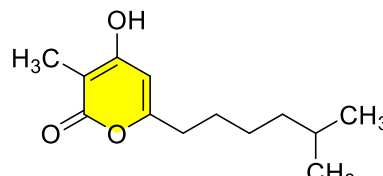 <p>4-hydroxy-3-methyl-6-(5-methylhexyl)-<br/>2<i>H</i>-pyran-2-one (<b>7hh</b>)<br/>(Violapyrone B)</p> | Isolated compound<br><sup>13</sup> C NMR<br>(125 MHz, DMSO- <i>d</i> <sub>6</sub> ) <sup>7</sup> | Present synthetic<br>compound<br><sup>13</sup> C NMR (125<br>MHz, DMSO- <i>d</i> <sub>6</sub> ) |                         |
|                                                                                                                                                                                            | 165.2 (C)                                                                                        | 165.1 (C)                                                                                       |                         |
|                                                                                                                                                                                            | 164.9 (C)                                                                                        | 164.9 (C)                                                                                       |                         |
|                                                                                                                                                                                            | 162.6 (C)                                                                                        | 162.5 (C)                                                                                       |                         |
|                                                                                                                                                                                            | 99.2 (CH)                                                                                        | 99.2 (CH)                                                                                       |                         |
|                                                                                                                                                                                            | 96.6 (C)                                                                                         | 96.5 (C)                                                                                        |                         |
| Isolated compound<br><sup>1</sup> H NMR<br>(500 MHz, DMSO- <i>d</i> <sub>6</sub> )                                                                                                         | Present synthetic<br>compound <sup>1</sup> H NMR<br>(500 MHz, DMSO- <i>d</i> <sub>6</sub> )      |                                                                                                 |                         |
| 11.1 (1H, br s)                                                                                                                                                                            | 11.1 (1H, br s)                                                                                  |                                                                                                 |                         |
|                                                                                                                                                                                            |                                                                                                  | 38.1 (CH <sub>2</sub> )                                                                         | 38.0 (CH <sub>2</sub> ) |
|                                                                                                                                                                                            |                                                                                                  | 32.6 (CH <sub>2</sub> )                                                                         | 32.6 (CH <sub>2</sub> ) |

|                            |                                |                             |                             |
|----------------------------|--------------------------------|-----------------------------|-----------------------------|
| 5.98 (1H, br s)            | 5.98 (1H, s)                   | 27.4 (CH)                   | 27.3 (CH)                   |
| 2.41 (2H, t, $J = 7.3$ Hz) | 2.41 (2H, t, $J = 7.5$ Hz)     | 26.6 (CH <sub>2</sub> )     | 26.5 (CH <sub>2</sub> )     |
| 1.74 (3H, s)               | 1.74 (3H, s)                   | 26.1 (CH <sub>2</sub> )     | 26.0 (CH <sub>2</sub> )     |
| 1.50 (2H, m)               | 1.50 (3H, quint, $J = 7.5$ Hz) | 22.5 (2 x CH <sub>3</sub> ) | 22.5 (2 x CH <sub>3</sub> ) |
| 1.49 (1H, m)               |                                | 8.4 (CH <sub>3</sub> )      | 8.4 (CH <sub>3</sub> )      |
| 1.27 (2H, m)               | 1.28 (2H, quint, $J = 7.0$ Hz) |                             |                             |
| 1.16 (2H, m)               | 1.16 (2H, q, $J = 8.0$ Hz)     |                             |                             |
| 0.85 (6H, d, $J = 6.6$ Hz) | 0.84 (6H, d, $J = 6.5$ Hz)     |                             |                             |

**Table S15.** Correlation of Natural and Synthetic NMR Data of Compound **7ih** (Violapyrone H):<sup>10</sup>

| 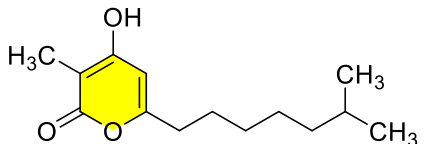<br>4-hydroxy-3-methyl-6-(6-methylheptyl)-2H-pyran-2-one ( <b>7ih</b> )<br>(Violapyrone H) | Isolated compound<br><sup>13</sup> C NMR<br>(100 MHz,<br>CD <sub>3</sub> OD) | Present synthetic<br>compound<br><sup>13</sup> C NMR (125<br>MHz, CD <sub>3</sub> OD) |           |
|--------------------------------------------------------------------------------------------------------------------------------------------------------------------------------|------------------------------------------------------------------------------|---------------------------------------------------------------------------------------|-----------|
|                                                                                                                                                                                |                                                                              | 169.9 (C)                                                                             | 169.1 (C) |
|                                                                                                                                                                                |                                                                              | 169.5 (C)                                                                             | 167.9 (C) |
|                                                                                                                                                                                |                                                                              | 164.8 (C)                                                                             | 164.9 (C) |

|                                                                          |                                                                                   |                             |                             |
|--------------------------------------------------------------------------|-----------------------------------------------------------------------------------|-----------------------------|-----------------------------|
|                                                                          |                                                                                   | 102.0 (CH)                  | 101.0 (CH)                  |
|                                                                          |                                                                                   | 98.7 (C)                    | 98.9 (C)                    |
| Isolated compound<br><sup>1</sup> H NMR<br>(400 MHz, CD <sub>3</sub> OD) | Present synthetic<br>compound <sup>1</sup> H NMR<br>(500 MHz, CD <sub>3</sub> OD) | 40.1 (CH <sub>2</sub> )     | 40.0 (CH <sub>2</sub> )     |
| 5.96 (1H, s)                                                             | 6.01 (1H, s)                                                                      | 34.4 (CH <sub>2</sub> )     | 34.2 (CH <sub>2</sub> )     |
| 2.46 (2H, t, <i>J</i> = 7.5 Hz)                                          | 2.49 (2H, t, <i>J</i> = 7.5 Hz)                                                   | 30.4 (CH <sub>2</sub> )     | 30.2 (CH <sub>2</sub> )     |
| 1.84 (3H, s)                                                             | 1.87 (3H, s)                                                                      | 29.7 (CH)                   | 29.1 (CH)                   |
| 1.64 (2H, m)                                                             | 1.66 (2H, quint, <i>J</i> = 7.5 Hz)                                               | 28.3 (CH <sub>2</sub> )     | 28.2 (CH <sub>2</sub> )     |
| 1.53 (1H, m)                                                             | 1.55 (1H, septet, <i>J</i> = 6.5 Hz)                                              | 28.1 (CH <sub>2</sub> )     | 28.0 (CH <sub>2</sub> )     |
| 1.34 (2H, m)                                                             | 1.36 (4H, quint, <i>J</i> = 3.5 Hz)                                               | 23.1 (2 x CH <sub>3</sub> ) | 23.0 (2 x CH <sub>3</sub> ) |
| 1.34 (2H, m)                                                             |                                                                                   | 8.4 (CH <sub>3</sub> )      | 8.2 (CH <sub>3</sub> )      |
| 1.19 (2H, m)                                                             | 1.21 (2H, m)                                                                      |                             |                             |
| 0.88 (6H, d, <i>J</i> = 6.5 Hz)                                          | 0.90 (6H, d, <i>J</i> = 7.0 Hz)                                                   |                             |                             |
|                                                                          |                                                                                   |                             |                             |

**Table S16.** Correlation of Natural and Synthetic NMR Data of Compound (-)-**71h** [(-)-Violapyrone C]:<sup>11</sup>

|                                                                                                                                                                                                            |                                                                                   |                                                                              |                                                                                       |
|------------------------------------------------------------------------------------------------------------------------------------------------------------------------------------------------------------|-----------------------------------------------------------------------------------|------------------------------------------------------------------------------|---------------------------------------------------------------------------------------|
| 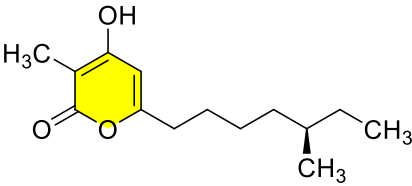 <p>(<i>R</i>)-4-hydroxy-3-methyl-6-(5-methylheptyl)-<br/>2<i>H</i>-pyran-2-one ((-)-<b>71h</b>)<br/>(Violapyrone C)</p> |                                                                                   | Isolated compound<br><sup>13</sup> C NMR<br>(125 MHz,<br>CD <sub>3</sub> OD) | Present synthetic<br>compound<br><sup>13</sup> C NMR (125<br>MHz, CD <sub>3</sub> OD) |
|                                                                                                                                                                                                            |                                                                                   | 169.3 (C)                                                                    | 169.2 (C)                                                                             |
|                                                                                                                                                                                                            |                                                                                   | 168.2 (C)                                                                    | 168.0 (C)                                                                             |
|                                                                                                                                                                                                            |                                                                                   | 165.0 (C)                                                                    | 165.0 (C)                                                                             |
|                                                                                                                                                                                                            |                                                                                   | 101.3 (CH)                                                                   | 101.1 (CH)                                                                            |
|                                                                                                                                                                                                            |                                                                                   | 99.0 (C)                                                                     | 99.0 (C)                                                                              |
| Isolated compound<br><sup>1</sup> H NMR<br>(500 MHz, CD <sub>3</sub> OD)                                                                                                                                   | Present synthetic<br>compound <sup>1</sup> H NMR<br>(500 MHz, CD <sub>3</sub> OD) | 37.5 (CH <sub>2</sub> )                                                      | 37.4 (CH <sub>2</sub> )                                                               |
| 5.99 (1H, s)                                                                                                                                                                                               | 6.01 (1H, s)                                                                      | 35.7 (CH)                                                                    | 35.6 (CH)                                                                             |
| 2.47 (2H, t, <i>J</i> = 7.5 Hz)                                                                                                                                                                            | 2.49 (2H, t, <i>J</i> = 7.5 Hz)                                                   | 34.4 (CH <sub>2</sub> )                                                      | 34.3 (CH <sub>2</sub> )                                                               |
| 1.85 (3H, s)                                                                                                                                                                                               | 1.87 (3H, s)                                                                      | 30.7 (CH <sub>2</sub> )                                                      | 30.6 (CH <sub>2</sub> )                                                               |
| 1.62 (2H, m)                                                                                                                                                                                               | 1.70-1.58 (2H, m)                                                                 | 28.4 (CH <sub>2</sub> )                                                      | 28.3 (CH <sub>2</sub> )                                                               |
| 1.36 (2H, m)                                                                                                                                                                                               | 1.45-1.30 (5H, m)                                                                 | 27.6 (CH <sub>2</sub> )                                                      | 27.5 (CH <sub>2</sub> )                                                               |
| 1.33 (2H, m)                                                                                                                                                                                               |                                                                                   | 19.7 (CH <sub>3</sub> )                                                      | 19.6 (CH <sub>3</sub> )                                                               |

|                                 |                   |                         |                         |
|---------------------------------|-------------------|-------------------------|-------------------------|
| 1.32 (1H, m)                    |                   | 11.9 (CH <sub>3</sub> ) | 11.8 (CH <sub>3</sub> ) |
| 1.15 (2H, m)                    | 1.22-1.11 (2H, m) | 8.4 (CH <sub>3</sub> )  | 8.3 (CH <sub>3</sub> )  |
| 0.87 (3H, t, <i>J</i> = 7.0 Hz) | 0.93-0.85 (6H, m) |                         |                         |
| 0.86 (3H, d, <i>J</i> = 6.5 Hz) |                   |                         |                         |
|                                 |                   |                         |                         |

**Table S17.** Correlation of Natural and Synthetic NMR Data of Compound **11ch** (Childinin G):<sup>12,13</sup>

|                                                                                                                                                                              |                                                                                   |                                                                                       |                         |
|------------------------------------------------------------------------------------------------------------------------------------------------------------------------------|-----------------------------------------------------------------------------------|---------------------------------------------------------------------------------------|-------------------------|
| 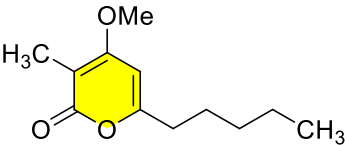 <p>4-Methoxy-3-methyl-6-pentyl-2<i>H</i>-pyran-2-one (<b>11ch</b>)<br/>(Childinin G)</p> | Isolated compound<br><sup>13</sup> C NMR<br>(150 MHz, CDCl <sub>3</sub> )         | Present synthetic<br>compound<br><sup>13</sup> C NMR (125<br>MHz, CDCl <sub>3</sub> ) |                         |
|                                                                                                                                                                              | 166.2 (C)                                                                         | 165.9 (C)                                                                             |                         |
|                                                                                                                                                                              | 166.0 (C)                                                                         | 165.8 (C)                                                                             |                         |
|                                                                                                                                                                              | 164.6 (C)                                                                         | 164.4 (C)                                                                             |                         |
|                                                                                                                                                                              | 94.3 (C)                                                                          | 100.8 (C)                                                                             |                         |
| 94.3 (CH)                                                                                                                                                                    | 94.1 (CH)                                                                         |                                                                                       |                         |
| Isolated compound<br><sup>1</sup> H NMR<br>(600 MHz, CDCl <sub>3</sub> )                                                                                                     | Present synthetic<br>compound <sup>1</sup> H NMR<br>(500 MHz, CDCl <sub>3</sub> ) | 56.3 (CH <sub>3</sub> )                                                               | 56.1 (CH <sub>3</sub> ) |



|                            |                                |                         |                         |
|----------------------------|--------------------------------|-------------------------|-------------------------|
| 5.99 (1H, s)               | 5.99 (1H, s)                   | 34.3 (CH <sub>2</sub> ) | 34.1 (CH <sub>2</sub> ) |
| 3.87 (3H, s)               | 3.87 (3H, s)                   | 31.3 (CH <sub>2</sub> ) | 31.1 (CH <sub>2</sub> ) |
| 2.47 (2H, t, $J = 7.9$ Hz) | 2.48 (2H, t, $J = 8.0$ Hz)     | 26.9 (CH <sub>2</sub> ) | 26.7 (CH <sub>2</sub> ) |
| 1.90 (3H, s)               | 1.90 (3H, s)                   | 22.5 (CH <sub>2</sub> ) | 22.2 (CH <sub>2</sub> ) |
| 1.66 (2H, m)               | 1.67 (2H, quint, $J = 7.5$ Hz) | 14.1 (CH <sub>3</sub> ) | 13.8 (CH <sub>3</sub> ) |
| 1.32 (4H, m)               | 1.37-1.29 (4H, m)              | 8.6 (CH <sub>3</sub> )  | 8.3 (CH <sub>3</sub> )  |
| 0.89 (3H, t, $J = 7.1$ Hz) | 0.90 (3H, t, $J = 7.0$ Hz)     |                         |                         |
|                            |                                |                         |                         |

**Table S18.** Correlation of Natural and Synthetic NMR Data of Compound **11fh** (Violapyrone Q):<sup>13</sup>

|                                                                                                                                                                                  |                                                                                     |                                                                                 |                                                                                         |
|----------------------------------------------------------------------------------------------------------------------------------------------------------------------------------|-------------------------------------------------------------------------------------|---------------------------------------------------------------------------------|-----------------------------------------------------------------------------------------|
| 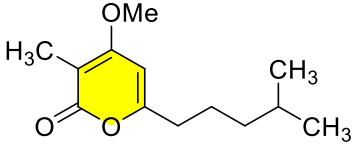 <p>4-Methoxy-3-methyl-6-(4-methylpentyl)-2H-pyran-2-one (<b>11fh</b>)<br/>(Violapyrone Q)</p> |                                                                                     | Isolated compound<br><sup>13</sup> C NMR<br>(125 MHz, DMSO-<br>d <sub>6</sub> ) | Present synthetic<br>compound<br><sup>13</sup> C NMR (125<br>MHz, DMSO-d <sub>6</sub> ) |
|                                                                                                                                                                                  |                                                                                     | 166.6 (C)                                                                       | 166.6 (C)                                                                               |
|                                                                                                                                                                                  |                                                                                     | 165.4 (C)                                                                       | 164.9 (C)                                                                               |
|                                                                                                                                                                                  |                                                                                     | 164.4 (C)                                                                       | 164.5 (C)                                                                               |
|                                                                                                                                                                                  |                                                                                     | 95.5 (C)                                                                        | 99.1 (C)                                                                                |
|                                                                                                                                                                                  |                                                                                     | 95.1 (CH)                                                                       | 95.3 (CH)                                                                               |
| Isolated compound<br><sup>1</sup> H NMR<br>(500 MHz, DMSO-d <sub>6</sub> )                                                                                                       | Present synthetic<br>compound <sup>1</sup> H NMR<br>(500 MHz, DMSO-d <sub>6</sub> ) | 56.0 (CH <sub>3</sub> )                                                         | 57.2 (CH <sub>3</sub> )                                                                 |
| 6.48 (1H, s)                                                                                                                                                                     | 6.48 (1H, s)                                                                        | 38.0 (CH <sub>2</sub> )                                                         | 38.1 (CH <sub>2</sub> )                                                                 |
| 3.95 (3H, s)                                                                                                                                                                     | 3.88 (3H, s)                                                                        | 33.6 (CH <sub>2</sub> )                                                         | 33.8 (CH <sub>2</sub> )                                                                 |
| 2.44 (2H, t, <i>J</i> = 7.5 Hz)                                                                                                                                                  | 2.48 (2H, t, <i>J</i> = 7.5 Hz)                                                     | 27.6 (CH)                                                                       | 27.6 (CH)                                                                               |
| 1.73 (3H, s)                                                                                                                                                                     | 1.76 (3H, s)                                                                        | 24.6 (CH <sub>2</sub> )                                                         | 24.8 (CH <sub>2</sub> )                                                                 |
| 1.59 (2H, m)                                                                                                                                                                     | 1.62-1.53 (3H, m)                                                                   | 22.8 (CH <sub>3</sub> )                                                         | 22.8 (CH <sub>3</sub> )                                                                 |
| 1.53 (1H, m)                                                                                                                                                                     |                                                                                     | 22.8 (CH <sub>3</sub> )                                                         | 22.8 (CH <sub>3</sub> )                                                                 |
| 1.16 (2H, m)                                                                                                                                                                     | 1.19 (2H, q, <i>J</i> = 7.0 Hz)                                                     | 9.0 (CH <sub>3</sub> )                                                          | 8.8 (CH <sub>3</sub> )                                                                  |

|                            |                            |  |  |
|----------------------------|----------------------------|--|--|
| 0.86 (3H, d, $J = 6.5$ Hz) | 0.87 (3H, d, $J = 7.0$ Hz) |  |  |
| 0.86 (3H, d, $J = 6.5$ Hz) | 0.87 (3H, d, $J = 7.0$ Hz) |  |  |
|                            |                            |  |  |

**Table S19.** Correlation of Natural and Synthetic NMR Data of Compound **11gh** (Violapyrone S):<sup>13</sup>

|                                                                                                                                                                        |                                                                                     |                                                                                 |                                                                                         |
|------------------------------------------------------------------------------------------------------------------------------------------------------------------------|-------------------------------------------------------------------------------------|---------------------------------------------------------------------------------|-----------------------------------------------------------------------------------------|
| 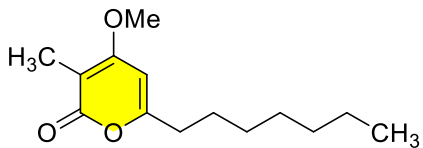 <p>6-Heptyl-4-methoxy-3-methyl-2H-pyran-2-one (<b>11gh</b>)<br/>(Violapyrone S)</p> |                                                                                     | Isolated compound<br><sup>13</sup> C NMR<br>(125 MHz, DMSO-<br>d <sub>6</sub> ) | Present synthetic<br>compound<br><sup>13</sup> C NMR (125<br>MHz, DMSO-d <sub>6</sub> ) |
|                                                                                                                                                                        |                                                                                     | 166.3 (C)                                                                       | 166.2 (C)                                                                               |
|                                                                                                                                                                        |                                                                                     | 164.7 (C)                                                                       | 164.5 (C)                                                                               |
|                                                                                                                                                                        |                                                                                     | 164.2 (C)                                                                       | 164.1 (C)                                                                               |
|                                                                                                                                                                        |                                                                                     | 98.8 (C)                                                                        | 98.6 (C)                                                                                |
|                                                                                                                                                                        |                                                                                     | 94.9 (CH)                                                                       | 94.9 (CH)                                                                               |
| Isolated compound<br><sup>1</sup> H NMR<br>(500 MHz, DMSO-d <sub>6</sub> )                                                                                             | Present synthetic<br>compound <sup>1</sup> H NMR<br>(500 MHz, DMSO-d <sub>6</sub> ) | 56.8 (CH <sub>3</sub> )                                                         | 56.7 (CH <sub>3</sub> )                                                                 |
| 6.47 (1H, s)                                                                                                                                                           | 6.43 (1H, s)                                                                        | 33.2 (CH <sub>2</sub> )                                                         | 33.1 (CH <sub>2</sub> )                                                                 |
| 3.85 (3H, s)                                                                                                                                                           | 3.85 (3H, s)                                                                        | 31.3 (CH <sub>2</sub> )                                                         | 31.1 (CH <sub>2</sub> )                                                                 |
| 2.46 (2H, t, $J = 7.5$ Hz)                                                                                                                                             | 2.48-2.43 (2H, m)                                                                   | 28.5 (CH <sub>2</sub> )                                                         | 28.3 (CH <sub>2</sub> )                                                                 |

|                            |                                |                         |                         |
|----------------------------|--------------------------------|-------------------------|-------------------------|
| 1.75 (3H, s)               | 1.73 (3H, s)                   | 28.4 (CH <sub>2</sub> ) | 28.3 (CH <sub>2</sub> ) |
| 1.58 (2H, m)               | 1.55 (2H, quint, $J = 7.0$ Hz) | 26.5 (CH <sub>2</sub> ) | 26.5 (CH <sub>2</sub> ) |
| 1.29 (2H, m)               | 1.28-1.21 (8H, m)              | 22.4 (CH <sub>2</sub> ) | 22.0 (CH <sub>2</sub> ) |
| 1.28 (2H, m)               |                                | 14.2 (CH <sub>3</sub> ) | 13.9 (CH <sub>3</sub> ) |
| 1.26 (2H, m)               |                                | 8.6 (CH <sub>3</sub> )  | 8.3 (CH <sub>3</sub> )  |
| 1.22 (2H, m)               |                                |                         |                         |
| 0.83 (3H, d, $J = 6.7$ Hz) | 0.83 (3H, t, $J = 7.0$ Hz)     |                         |                         |
|                            |                                |                         |                         |

**Table S20.** Correlation of Natural and Synthetic NMR Data of Compound **11hh** (Violapyrone R):<sup>13,14</sup>

|                                                                                                                                                                                 |                                                                                                 |                                                                                         |                                                                                                     |
|---------------------------------------------------------------------------------------------------------------------------------------------------------------------------------|-------------------------------------------------------------------------------------------------|-----------------------------------------------------------------------------------------|-----------------------------------------------------------------------------------------------------|
| 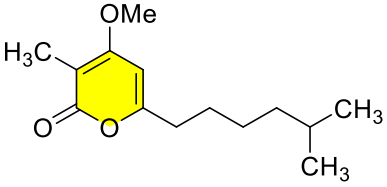 <p>4-Methoxy-3-methyl-6-(5-methylhexyl)-2H-pyran-2-one (<b>11hh</b>)<br/>(Violapyrone R)</p> |                                                                                                 | Isolated compound<br><sup>13</sup> C NMR<br>(125 MHz, DMSO- <sub>d</sub> <sub>6</sub> ) | Present synthetic<br>compound<br><sup>13</sup> C NMR (125<br>MHz, DMSO- <sub>d</sub> <sub>6</sub> ) |
|                                                                                                                                                                                 |                                                                                                 | 166.2 (C)                                                                               | 166.3 (C)                                                                                           |
|                                                                                                                                                                                 |                                                                                                 | 164.5 (C)                                                                               | 164.6 (C)                                                                                           |
|                                                                                                                                                                                 |                                                                                                 | 164.2 (C)                                                                               | 164.2 (C)                                                                                           |
|                                                                                                                                                                                 |                                                                                                 | 98.6 (C)                                                                                | 98.7 (C)                                                                                            |
|                                                                                                                                                                                 |                                                                                                 | 95.0 (CH)                                                                               | 95.0 (CH)                                                                                           |
| Isolated compound<br><sup>1</sup> H NMR<br>(500 MHz, DMSO- <sub>d</sub> <sub>6</sub> )                                                                                          | Present synthetic<br>compound <sup>1</sup> H NMR<br>(500 MHz, DMSO- <sub>d</sub> <sub>6</sub> ) | 56.9 (CH <sub>3</sub> )                                                                 | 56.8 (CH <sub>3</sub> )                                                                             |
| 6.48 (1H, s)                                                                                                                                                                    | 6.48 (1H, s)                                                                                    | 38.1 (CH <sub>2</sub> )                                                                 | 38.1 (CH <sub>2</sub> )                                                                             |
| 3.87 (3H, s)                                                                                                                                                                    | 3.87 (3H, s)                                                                                    | 33.3 (CH <sub>2</sub> )                                                                 | 33.2 (CH <sub>2</sub> )                                                                             |
| 2.50 (2H, t, <i>J</i> = 7.5 Hz)                                                                                                                                                 | 2.49 (2H, t, <i>J</i> = 7.5 Hz)                                                                 | 27.4 (CH)                                                                               | 27.4 (CH)                                                                                           |
| 1.75 (3H, s)                                                                                                                                                                    | 1.75 (3H, s)                                                                                    | 26.8 (CH <sub>2</sub> )                                                                 | 26.8 (CH <sub>2</sub> )                                                                             |
| 1.53 (2H, m)                                                                                                                                                                    | 1.60 - 1.47 (3H, m)                                                                             | 26.1 (CH <sub>2</sub> )                                                                 | 26.2 (CH <sub>2</sub> )                                                                             |
| 1.47 (1H, m)                                                                                                                                                                    |                                                                                                 | 22.6 (CH <sub>3</sub> )                                                                 | 22.5 (CH <sub>3</sub> )                                                                             |

|                                       |                            |                         |                         |
|---------------------------------------|----------------------------|-------------------------|-------------------------|
| 1.29 (2H, m)                          | 1.30 (2H, m)               | 22.6 (CH <sub>3</sub> ) | 22.5 (CH <sub>3</sub> ) |
| 1.18 (2H, m)                          | 1.18 (2H, m)               | 8.7 (CH <sub>3</sub> )  | 8.5 (CH <sub>3</sub> )  |
| 0.86 (3H, dd, $J = 15.6$ ,<br>7.0 Hz) | 0.85 (3H, d, $J = 6.5$ Hz) |                         |                         |
| 0.86 (3H, dd, $J = 15.6$ ,<br>7.0 Hz) | 0.85 (3H, d, $J = 6.5$ Hz) |                         |                         |
|                                       |                            |                         |                         |

**Table S21.** Correlation of Natural and Synthetic NMR Data of Compound **3d** (Fistupyron):<sup>14</sup>

|                                                                                                                                                             |                                                                                   |                                                                                       |                         |
|-------------------------------------------------------------------------------------------------------------------------------------------------------------|-----------------------------------------------------------------------------------|---------------------------------------------------------------------------------------|-------------------------|
| 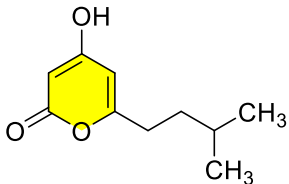 <p>4-Hydroxy-6-isopentyl-2H-pyran-2-one (<b>3d</b>)<br/>(Fistupyron)</p> | Isolated compound<br><sup>13</sup> C NMR<br>(100 MHz, CDCl <sub>3</sub> )         | Present synthetic<br>compound<br><sup>13</sup> C NMR (100<br>MHz, CDCl <sub>3</sub> ) |                         |
|                                                                                                                                                             | 172.7 (C)                                                                         | 172.6 (C)                                                                             |                         |
|                                                                                                                                                             | 168.4 (C)                                                                         | 168.3 (C)                                                                             |                         |
|                                                                                                                                                             | 167.6 (C)                                                                         | 167.5 (C)                                                                             |                         |
|                                                                                                                                                             | 101.2 (CH)                                                                        | 101.1 (CH)                                                                            |                         |
|                                                                                                                                                             | 89.7 (CH)                                                                         | 89.6 (CH)                                                                             |                         |
| Isolated compound<br><sup>1</sup> H NMR<br>(400 MHz, CDCl <sub>3</sub> )                                                                                    | Present synthetic<br>compound <sup>1</sup> H NMR<br>(500 MHz, CDCl <sub>3</sub> ) | 35.5 (CH <sub>2</sub> )                                                               | 35.5 (CH <sub>2</sub> ) |

|                                 |                                     |                             |                             |
|---------------------------------|-------------------------------------|-----------------------------|-----------------------------|
| 6.01 (1H, s)                    | 5.99 (1H, s)                        | 31.6 (CH <sub>2</sub> )     | 31.5 (CH <sub>2</sub> )     |
| 5.58 (1H, s)                    | 5.58 (1H, d, <i>J</i> = 1.5 Hz)     | 27.5 (CH)                   | 27.4 (CH)                   |
| 2.49 (2H, t, <i>J</i> = 7.8 Hz) | 2.48 (2H, t, <i>J</i> = 7.5 Hz)     | 22.2 (2 x CH <sub>3</sub> ) | 22.1 (2 x CH <sub>3</sub> ) |
| 1.57 (1H, m)                    | 1.59 (1H, nonet, <i>J</i> = 6.5 Hz) |                             |                             |
| 1.53 (2H, m)                    | 1.52 (2H, q, <i>J</i> = 8.0 Hz)     |                             |                             |
| 0.91 (6H, d, <i>J</i> = 6.4 Hz) | 0.91 (6H, d, <i>J</i> = 6.5 Hz)     |                             |                             |

**Table S22:** Correlation of Natural and Synthetic HRMS values for Photopyrone C, E, G.<sup>2</sup>

| Photopyrone | Product Number | Molecular formula                              | Calcd. [M+H] (m/z) | Isolated compound HR ESI MS (m/z) | Present synthetic compound HR ESI MS (m/z) |
|-------------|----------------|------------------------------------------------|--------------------|-----------------------------------|--------------------------------------------|
| C           | <b>7be</b>     | C <sub>17</sub> H <sub>28</sub> O <sub>3</sub> | 281.211121         | 281.2115                          | 281.2117                                   |
| E           | <b>7bf</b>     | C <sub>19</sub> H <sub>32</sub> O <sub>3</sub> | 309.242421         | 309.2428                          | 309.2430                                   |
| G           | <b>7bg</b>     | C <sub>21</sub> H <sub>36</sub> O <sub>3</sub> | 337.273721         | 337.2741                          | 337.2743                                   |

### 23. References:

1. Zhang, X. M.; Peng, A. H.; Xie, W. D.; Wang, M.; Zheng, D.; Feng, M. K.; Hexokinase II Inhibitory Effect of Secondary Metabolites Derived from a *Streptomyces* sp. Associated with Mud Dauber Wasp. *Chem. Biodiverse.*, **2020**, *17*, e2000140.
2. Brachmann, A. O.; Brameyer, S.; Kresovic, D.; Hitkova, I.; Kopp, Y.; Manske, C.; Schubert, K.; Bode, H. B.; Heermann, R. Pyrones as bacterial signaling molecules. *Nat. Chem. Bio.* **2013**, *9*, 573-578.
3. Chaladaj, W.; Corbet, M.; Fürstner, A. Total synthesis of neurymenolide A based on a gold-catalyzed synthesis of 4-hydroxy-2-pyrones. *Angew. Chem. Int. Ed.* **2012**, *51*, 6929-6933.
4. Kresovic, D.; Schempp, F.; Cheikh-Ali, Z.; Bode, H. B. A novel and widespread class of ketosynthase is responsible for the head-to-head condensation of two acyl moieties in bacterial pyrone biosynthesis. *Beilstein J. Org. Chem.* **2015**, *11*, 1412-1417.
5. Hou, L.; Huang, H.; Li, H.; Wang, S.; Ju, J.; Li, W. Overexpression of a type III PKS gene affording novel violapyrones with enhanced anti-influenza A virus activity. *Microb. Cell Factories* **2018**, *17*, 61.
6. Georgousaki, K.; González-Menéndez, V.; Tormo, J. R.; Tsafantakis, N.; Mackenzie, T. A.; Martín, J.; Gumeni, S.; Trougakos, I. P.; Reyes, F.; Fokialakis, N.; Genilloud, O. Comoclatrin, a novel potent skin-whitening agent produced by endophytic *Comoclatris* strains associated with Andalusia desert plants. *Scientific Reports* **2022**, *12*, 1649.
7. Yang, R.-M.; Zhang, X.-L.; Wang, Li.; Huang, J.-P.; Yang, J.; Yan, Y.-J.; Luo, J.-Y.; Wang, X.-T.; Huang, S.-X.  $\alpha$ -Pyrone derivatives from a *Streptomyces* strain resensitize tamoxifen resistance in breast cancer cells. *Nat. Prod. Bioprospect.* **2017**, *7*, 329-334.
8. Huang, H.; Hou, L.; Li, H.; Qiu, Y.; Ju, J.; Li, W. Activation of a plasmid-situated type III PKS gene cluster by deletion of a *wbl* gene in deepsea-derived *Streptomyces somaliensis* SCSIO ZH66. *Microb. Cell Factories* **2016**, *15*, 116.
9. Zhang, J.; Jiang, Y.; Cao, Y.; Liu, J.; Zheng, D.; Chen, X.; Han, Li.; Jiang, C.; Huang, X. Violapyrones A–G,  $\alpha$ -Pyrone derivatives from *Streptomyces violascens* isolated from *Hylobates hoolock* feces. *J. Nat. Prod.* **2013**, *76*, 2126-2130.
10. Shin, H. J.; Lee, H. S.; Lee, J. S.; Shin, J.; Lee, M. A.; Lee, Y. J.; Yun, J.; Kang, J. S. Violapyrones H and I, New Cytotoxic Compounds Isolated from *Streptomyces* sp Associated with the Marine Starfish *Acanthaster planci*. *Mar. Drugs* **2014**, *12*, 3283-3291, DOI: 10.3390/md12063283.
11. Lee, J. S.; Shin, J.; Shin, H. J.; Lee, H.-S.; Lee, Y.-J.; Lee, H.-S.; Won, H. Total synthesis and configurational validation of (+)-violapyrone C. *Eur. J. Org. Chem.* **2014**, *2014*, 4472-4476.
12. Zhao, Z.-Z.; Chen, H.-P.; Huang, Y.; Zhang, S.-B.; Li, Z.-H.; Feng, T.; Liu, J.-K. Bioactive polyketides and 8,14-*seco*-ergosterol from fruiting bodies of the ascomycete *Daldinia childiae*. *Phytochem.* **2017**, *142*, 68-75.



13. Hou, L.; Wang, S.; Huang, H.; Li, H.; Wang, W.; Li, W. Generation of methylated violapyrones with improved anti-influenza A virus activity by heterologous expression of a type III PKS gene in a marine *Streptomyces* strain. *Bioorganic Med. Chem. Lett.* **2018**, *28*, 2865-2868.
14. Igarashi, Y.; Ogawa, M.; Sat, Y.; Saito, N.; Yoshida, R.; Kunoh, H.; Onaka, H.; Furumai, T. Fistupyronone, a novel inhibitor of the infection of chinese cabbage by *Alternaria brassicicola*, from *Streptomyces* sp. TP-A0569. *J. Antibiot.* **2000**, *53*, 1117-1122.

<sup>1</sup>HNMR 500 MHz CD<sub>3</sub>OD

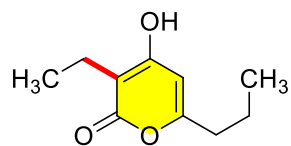

Isogermicidin B

**Isogermicidin B (7ab)**

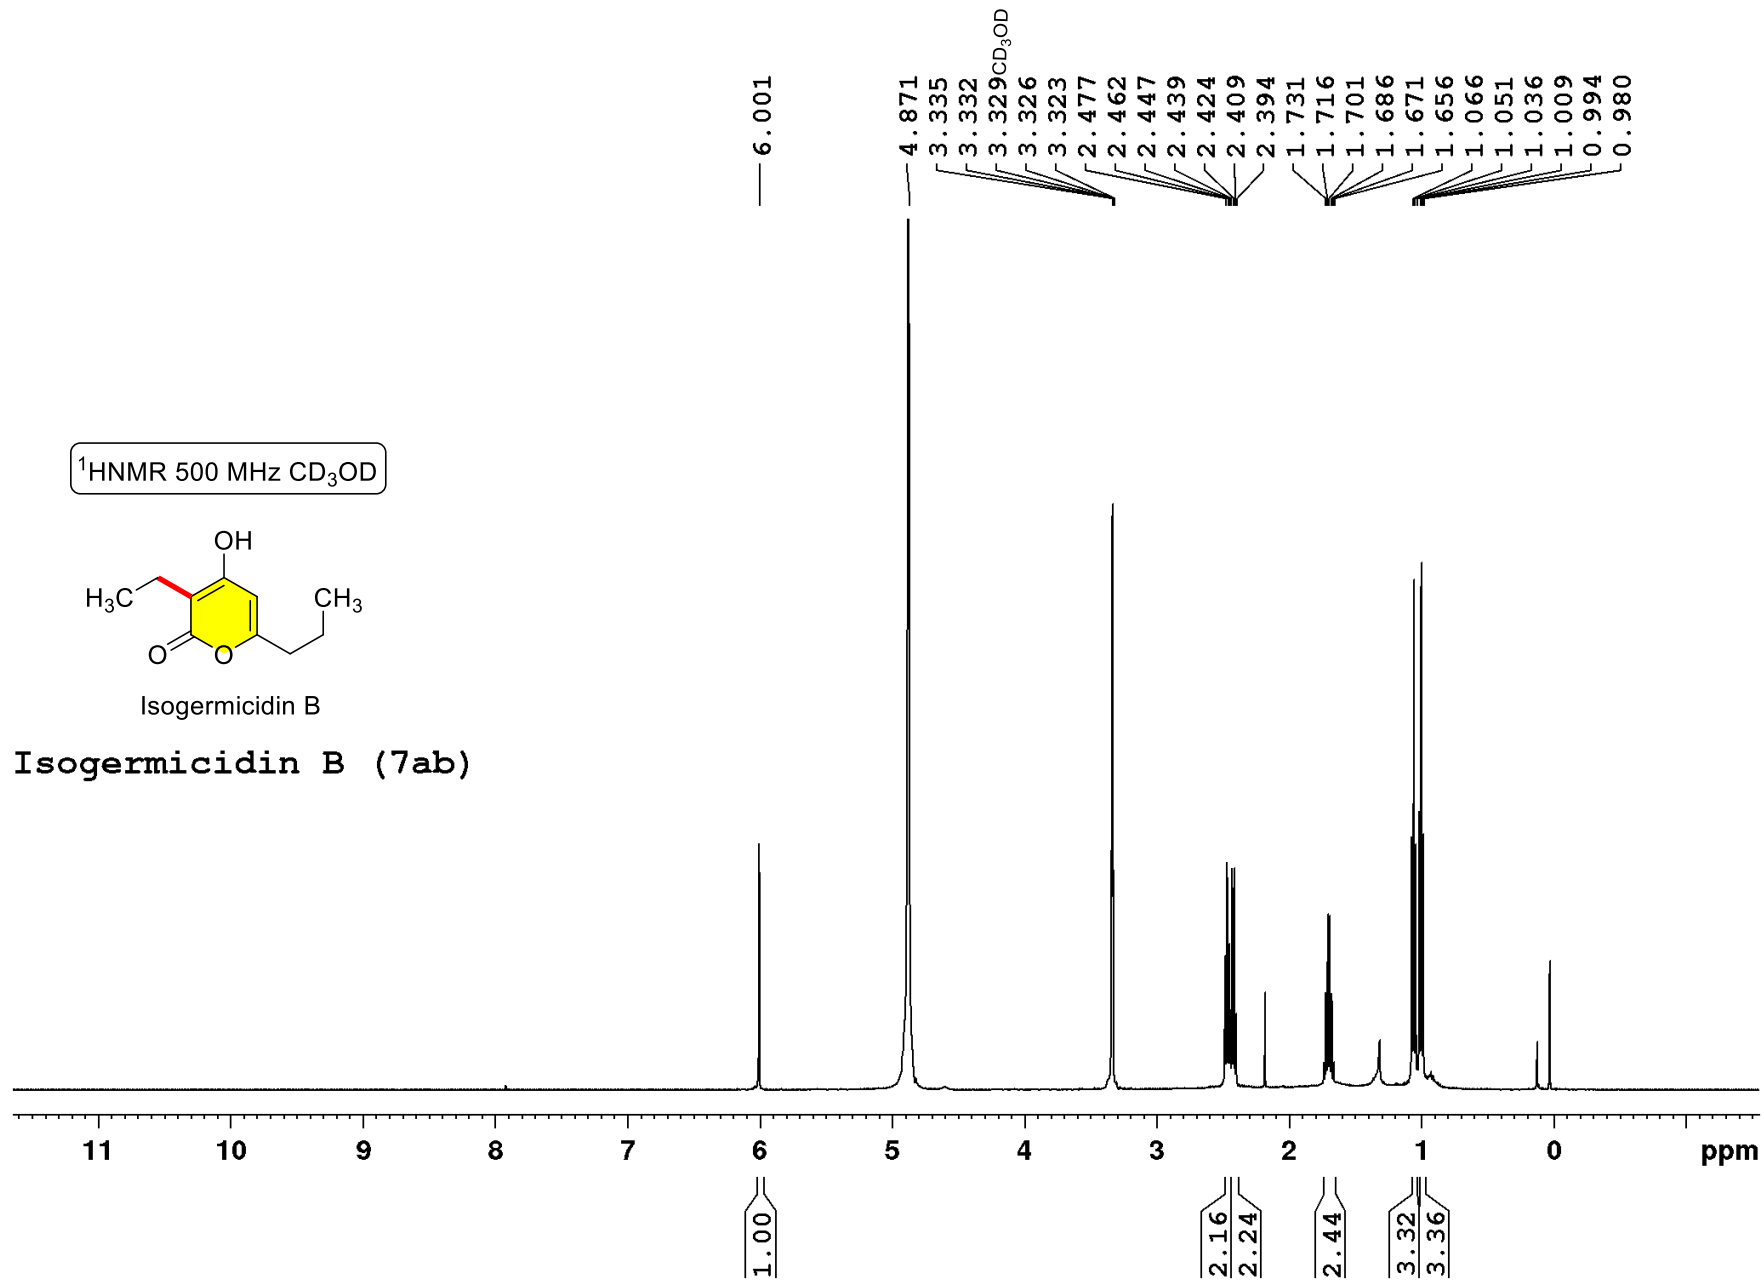

13C {1H} NMR 500 MHz CD<sub>3</sub>OD

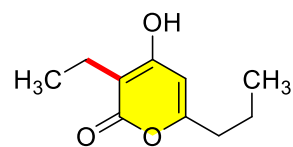

Isogermicidin B

Isogermicidin B (7ab)

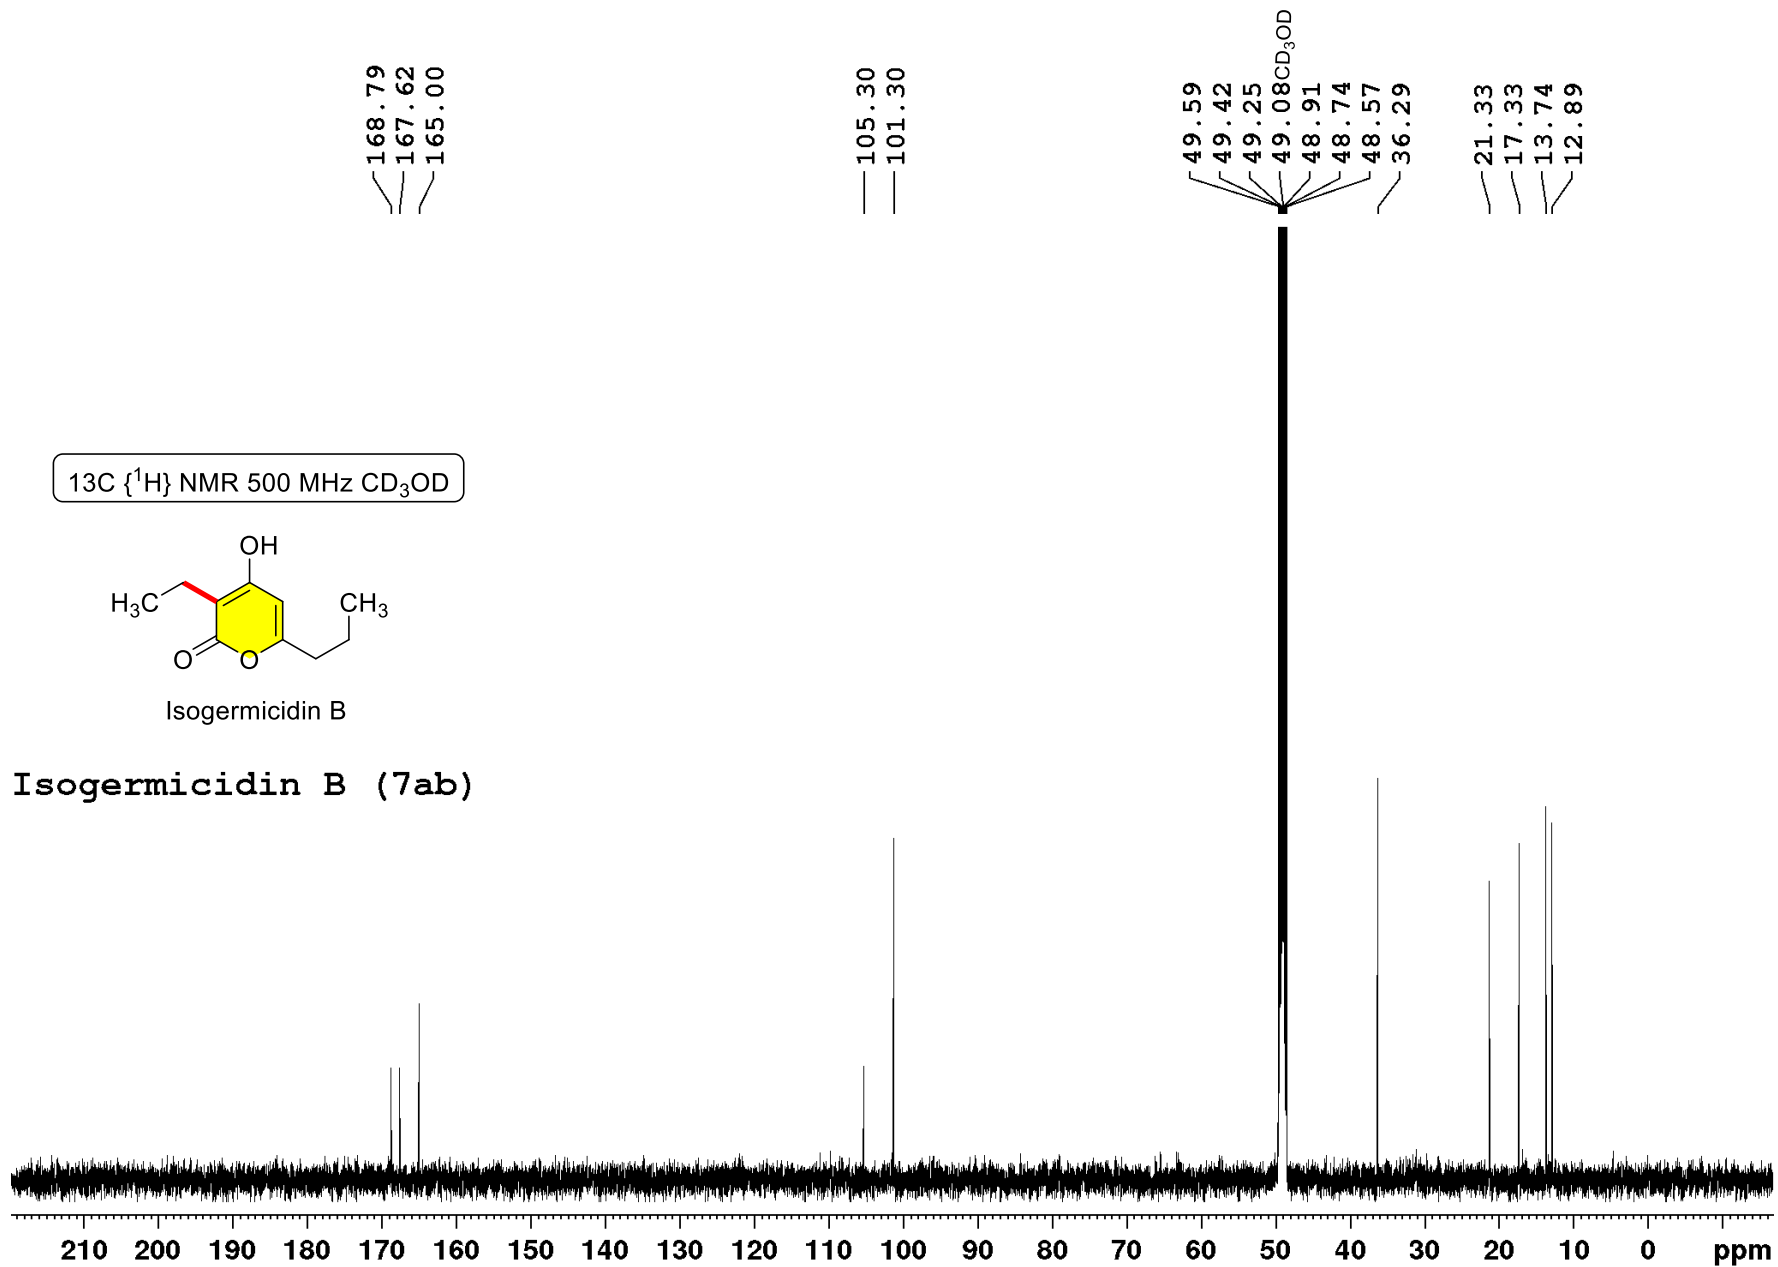

<sup>1</sup>HNMR 500 MHz CD<sub>3</sub>OD

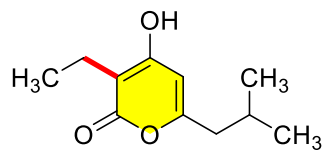

Isogermicidin A

**Isogermicidin A (7bb)**

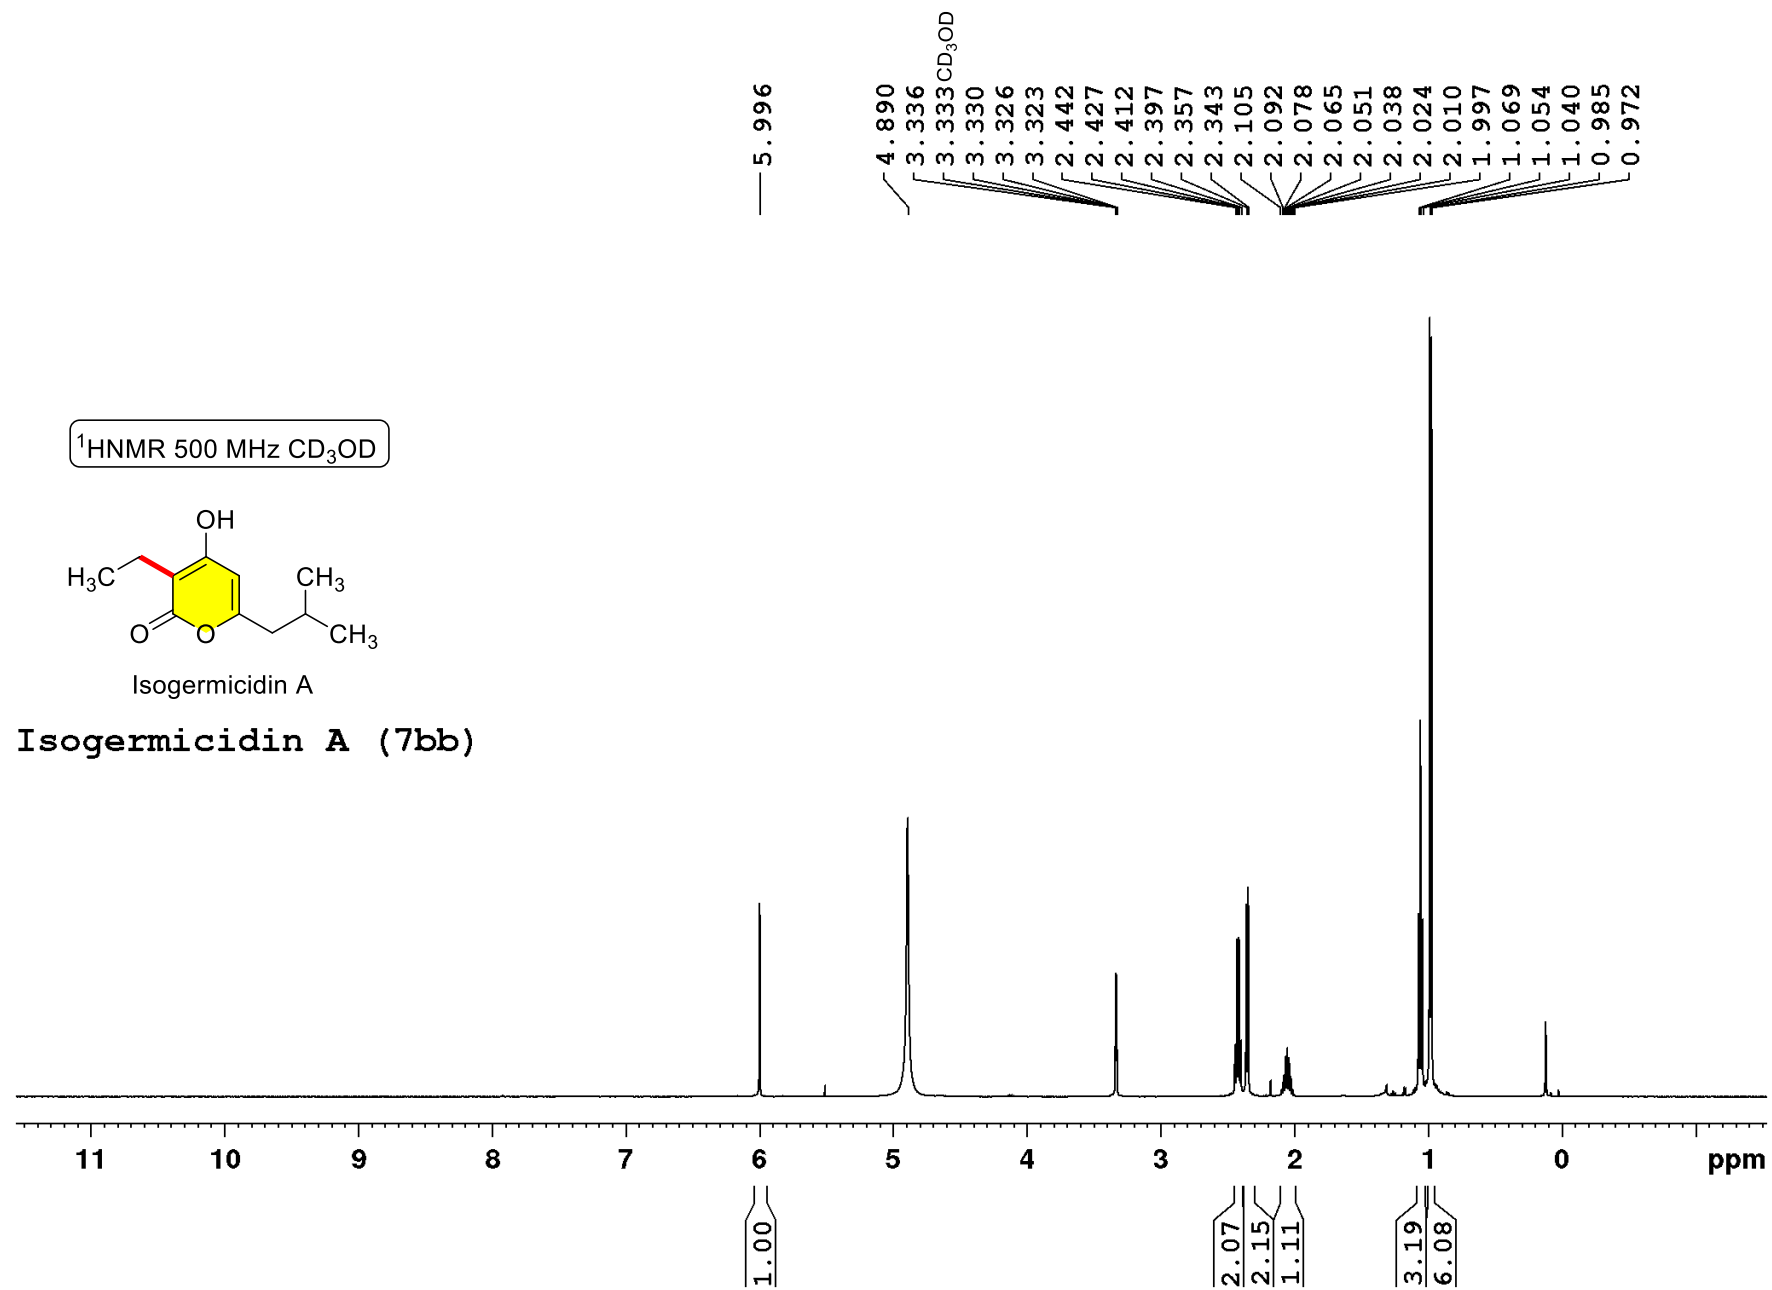

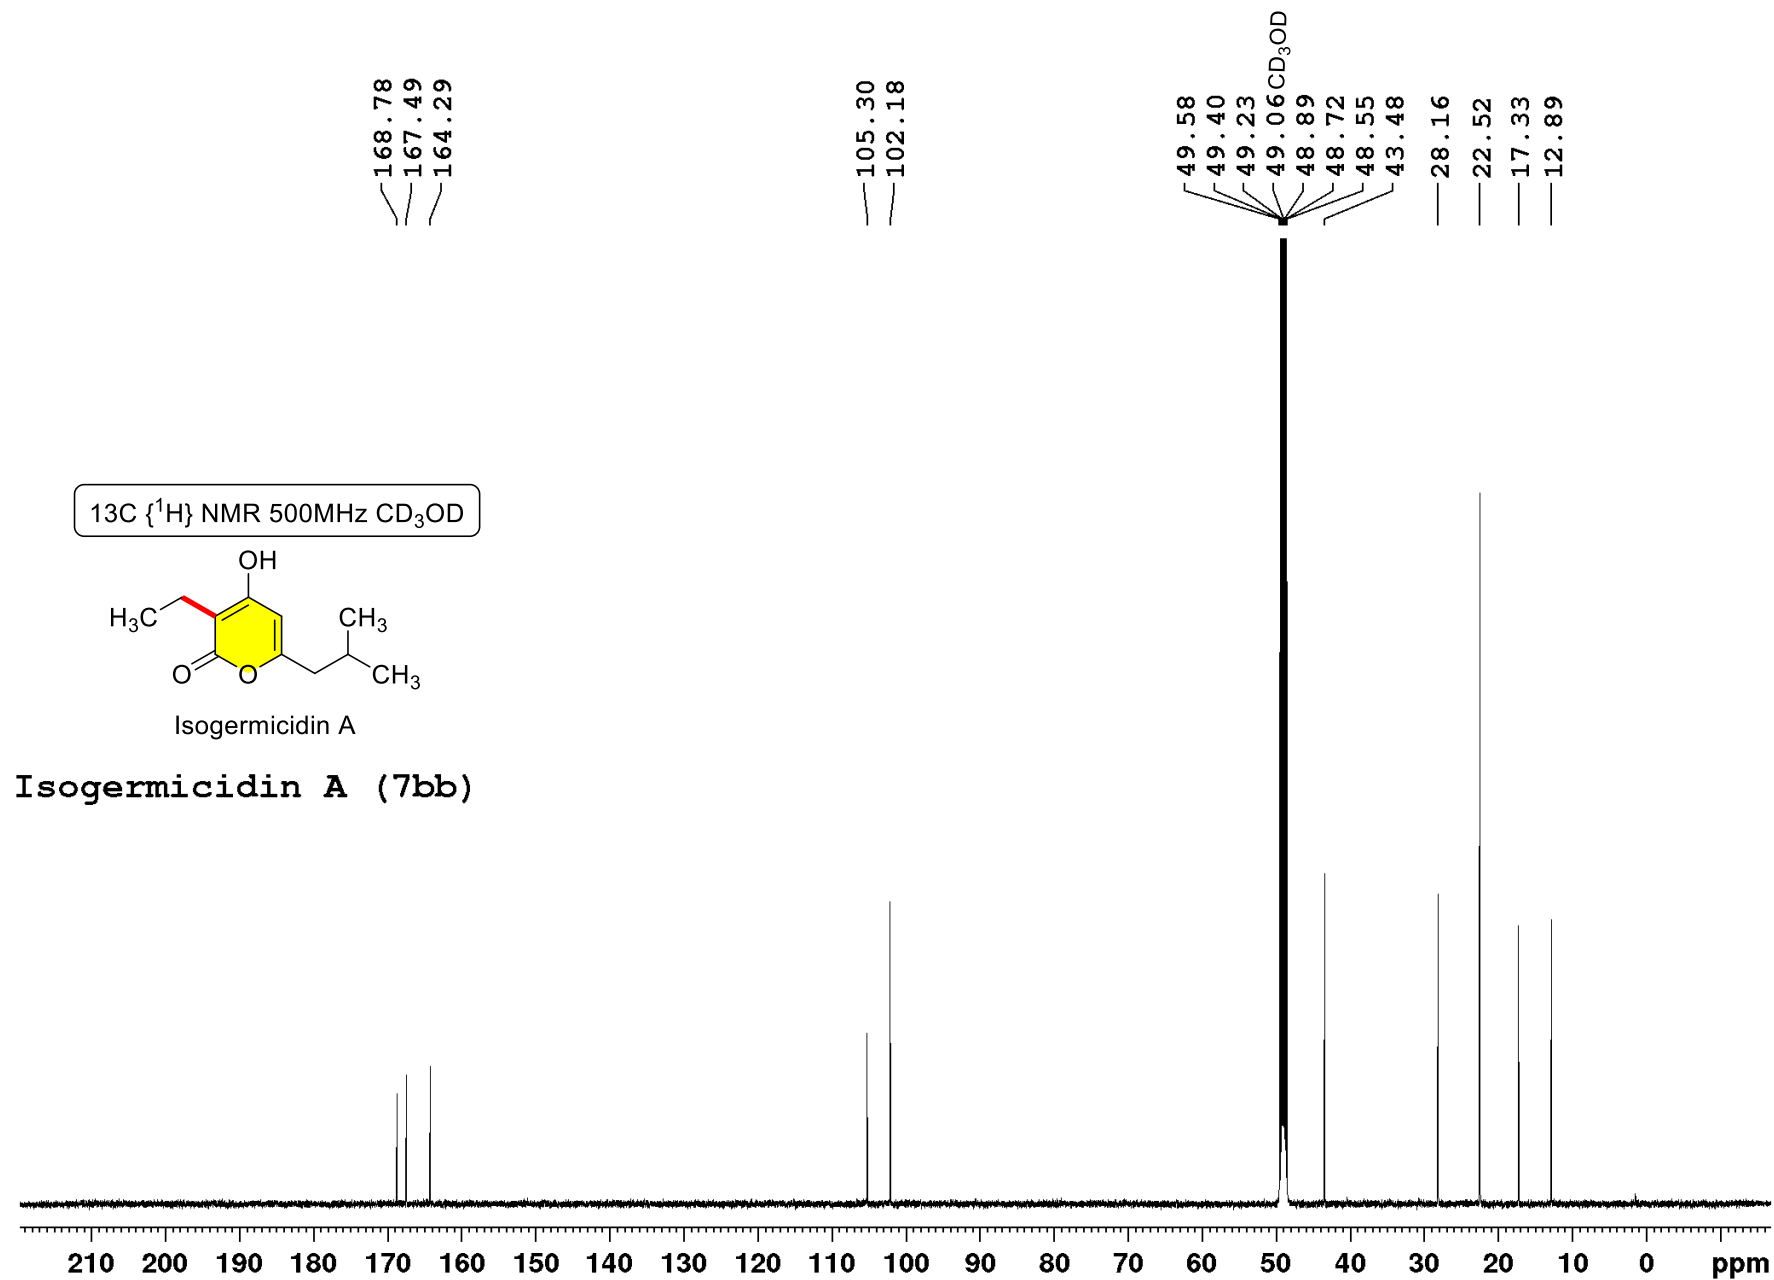

<sup>1</sup>HNMR 500 MHz CD<sub>3</sub>OD

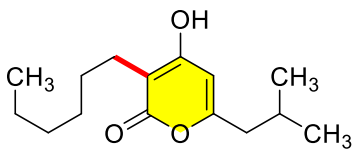

Photopyrone A

Photopyrone A (7bc)

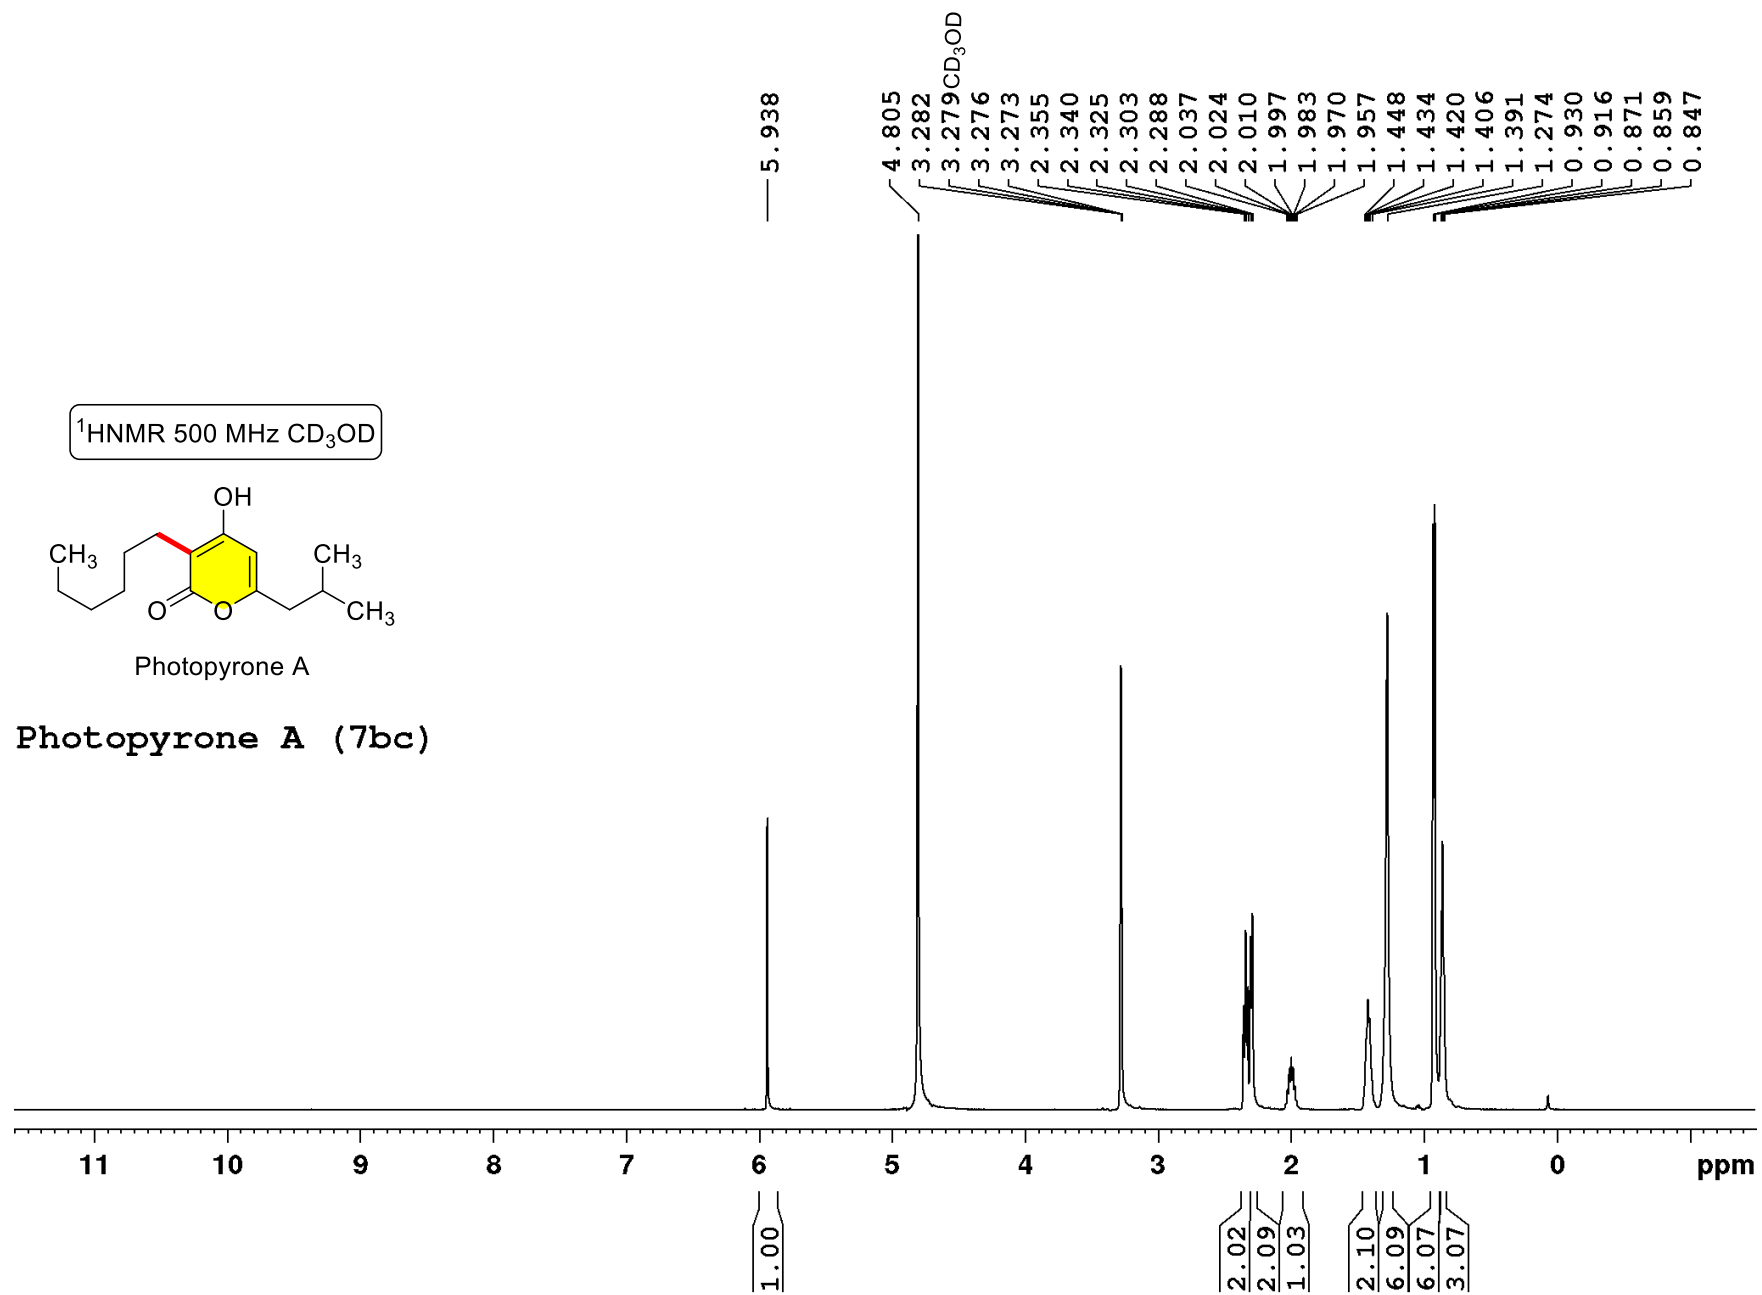

<sup>1</sup>HNMR 500MHz CD<sub>3</sub>OD

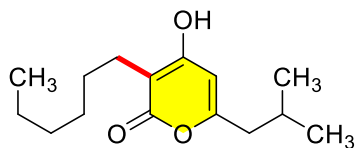

Photopyrone A

Photopyrone A (7bc)

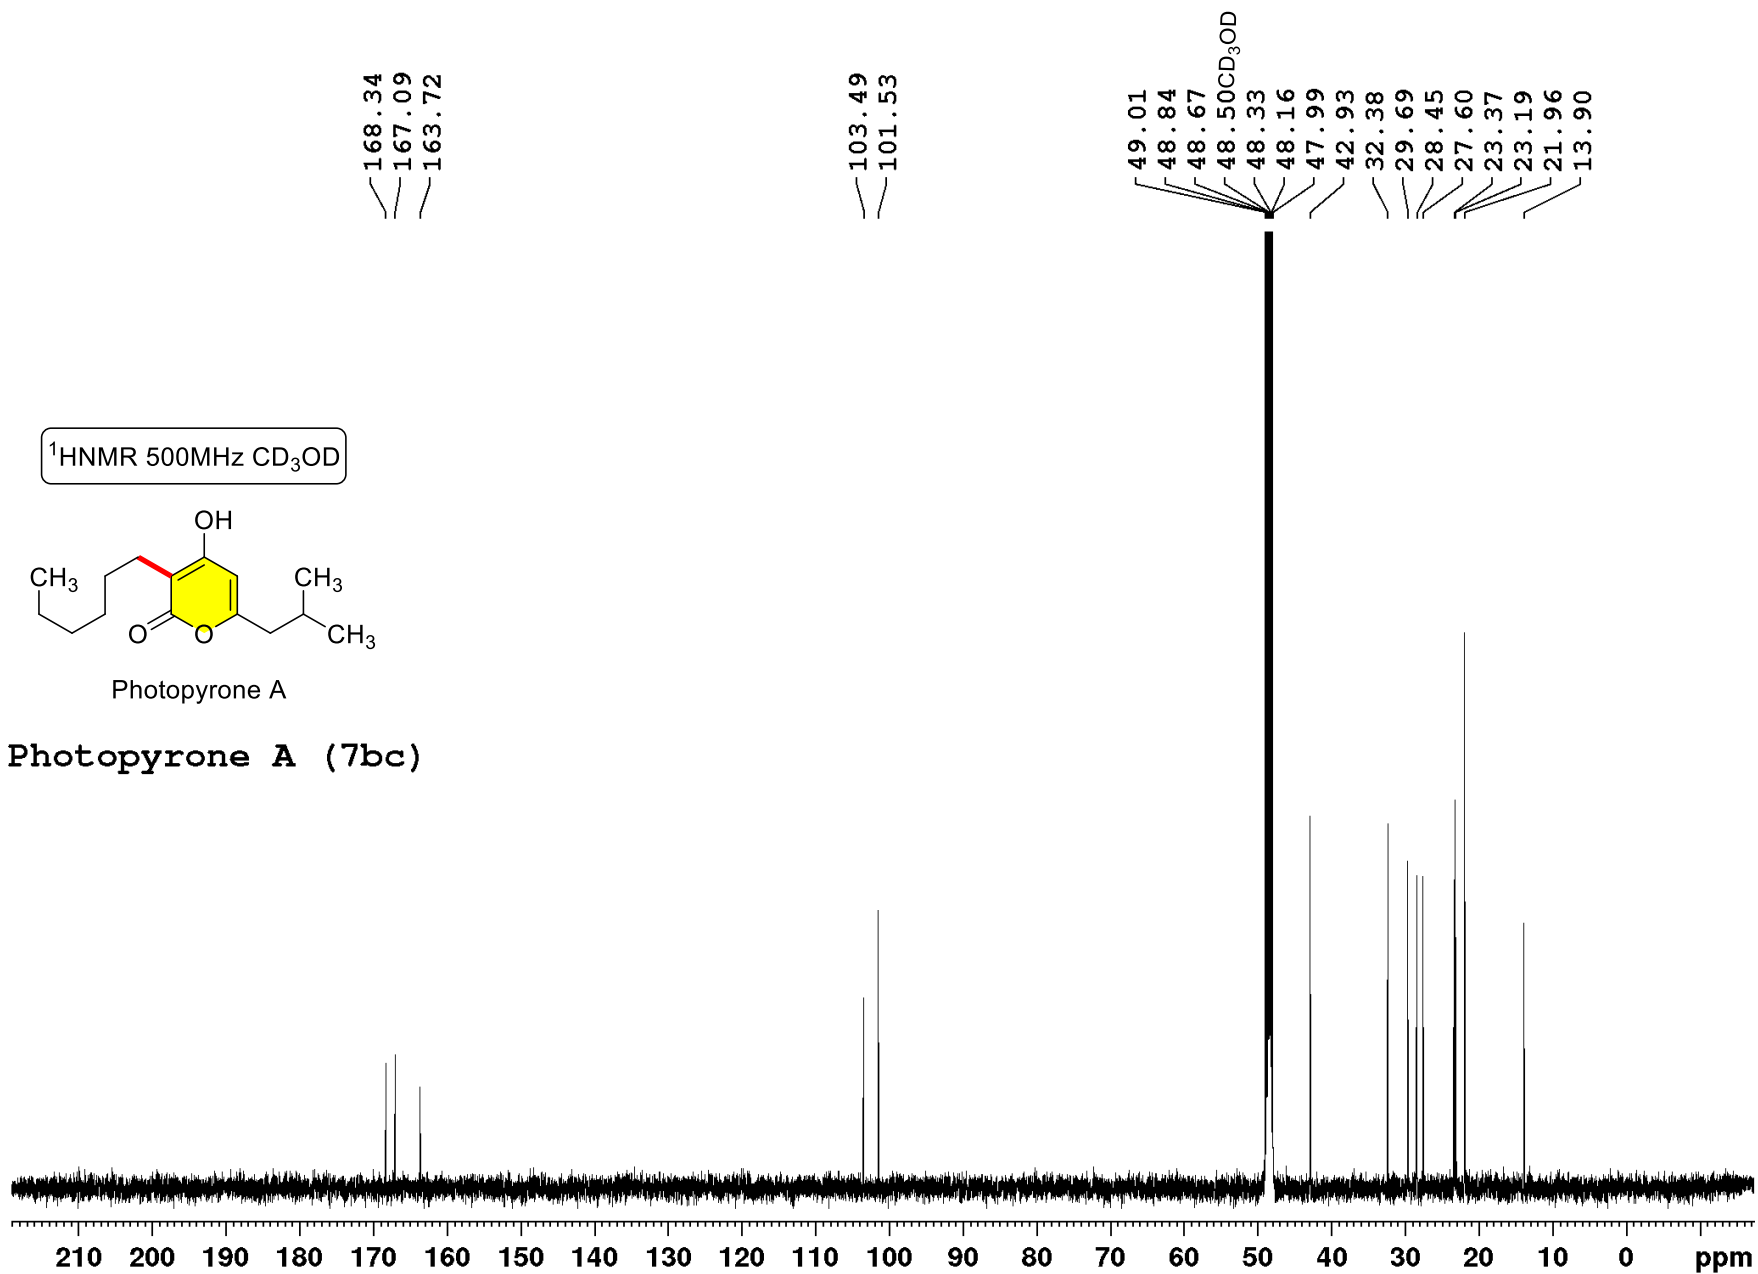

<sup>1</sup>HNMR 500 MHz CD<sub>3</sub>OD

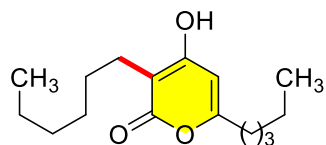

Pseudopyronine A

### Pseudopyronine A (7cc)

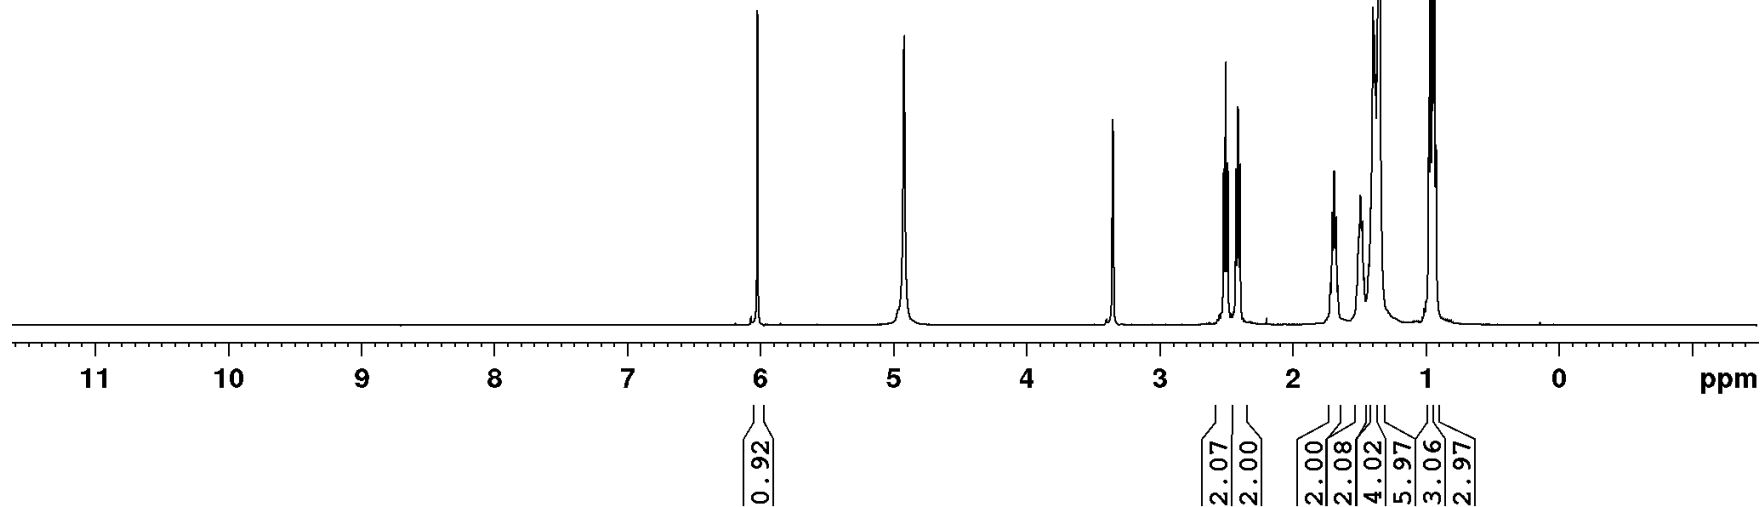

6.021

4.919

3.353

3.350 CD<sub>3</sub>OD

3.347

2.517

2.502

2.487

2.425

2.410

2.394

1.716

1.701

1.687

1.672

1.658

1.502

1.490

1.476

1.461

1.426

1.413

1.400

1.396

1.389

1.381

1.375

1.348

0.975

0.962

0.947



13C {1H} NMR 500 MHz CD3OD

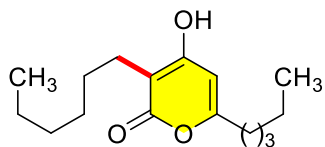

Pseudopyronine A

**Pseudopyronine A (7cc)**

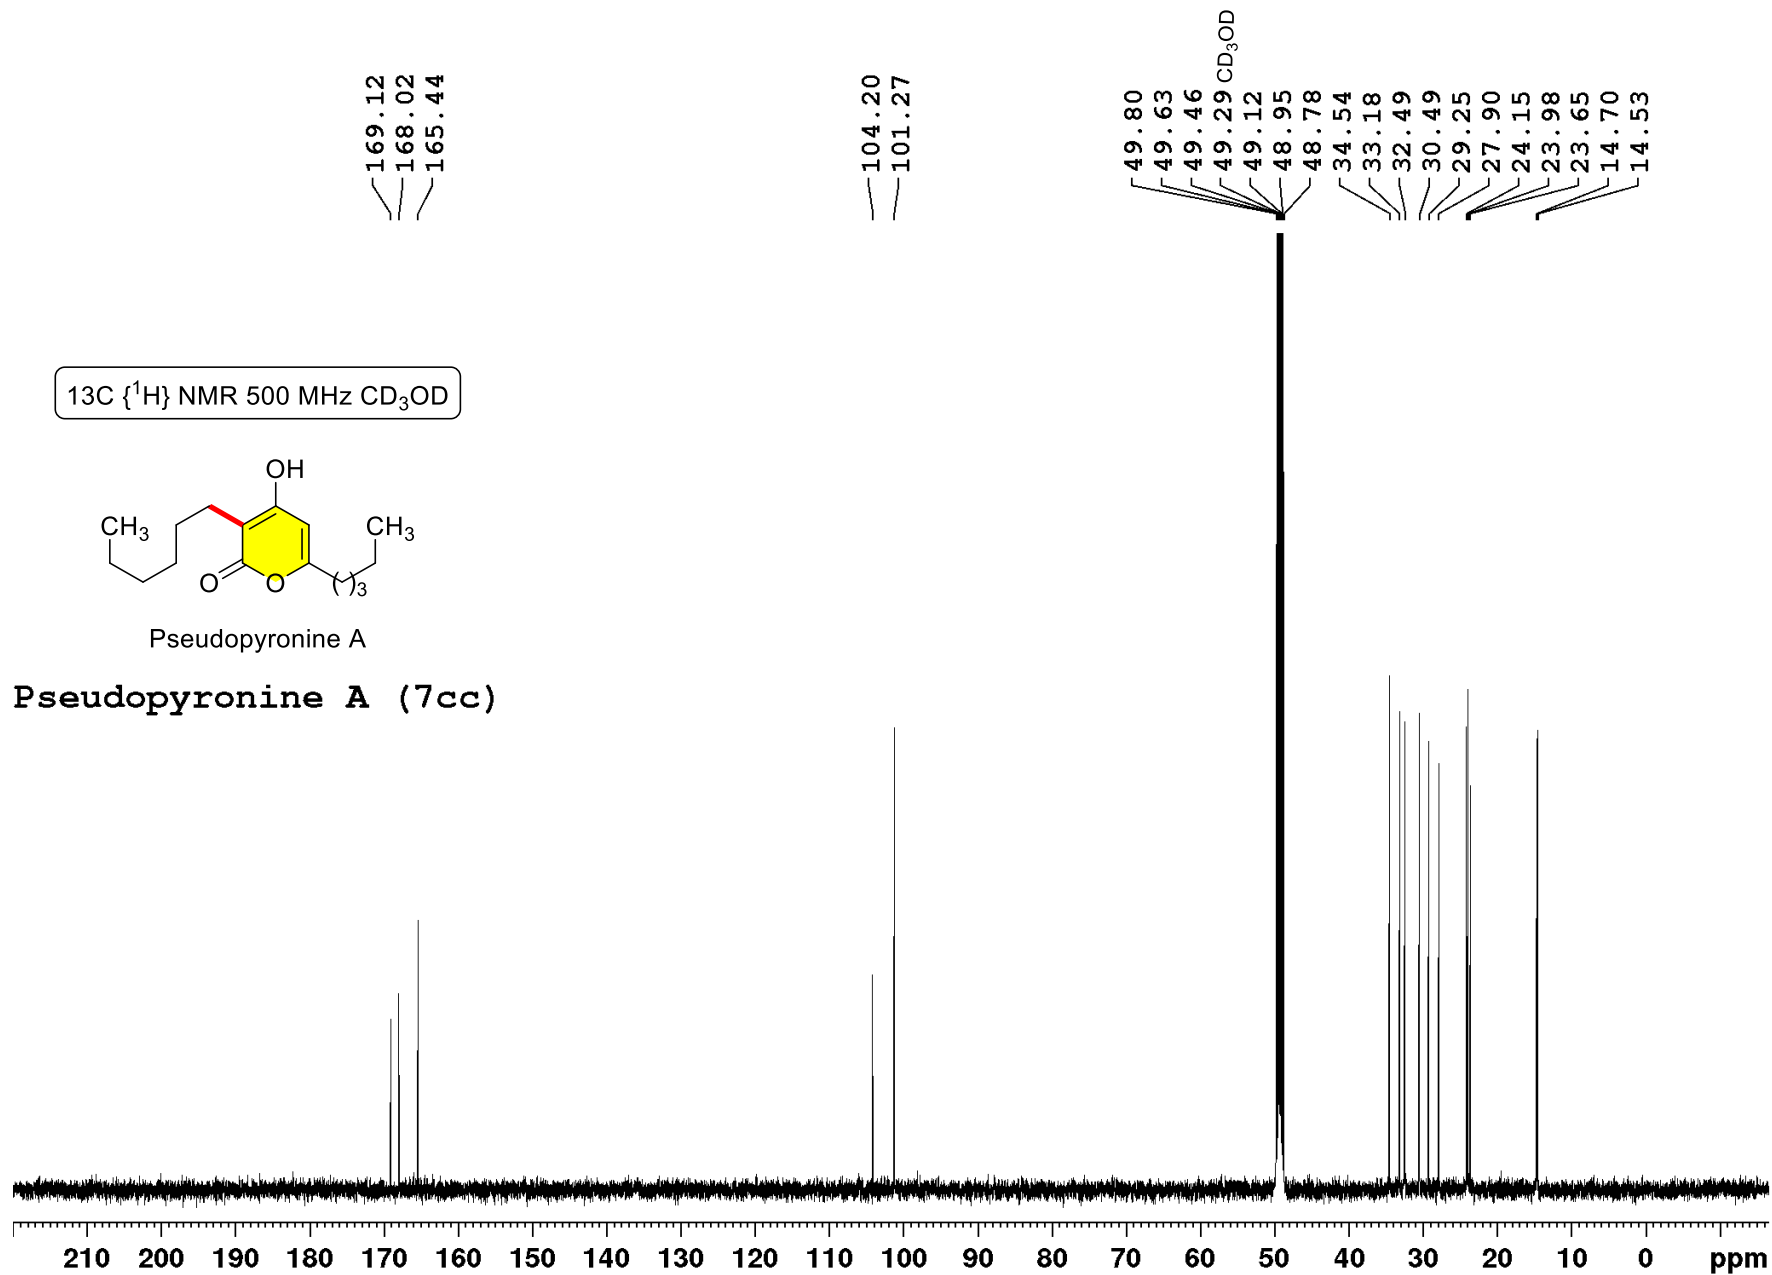

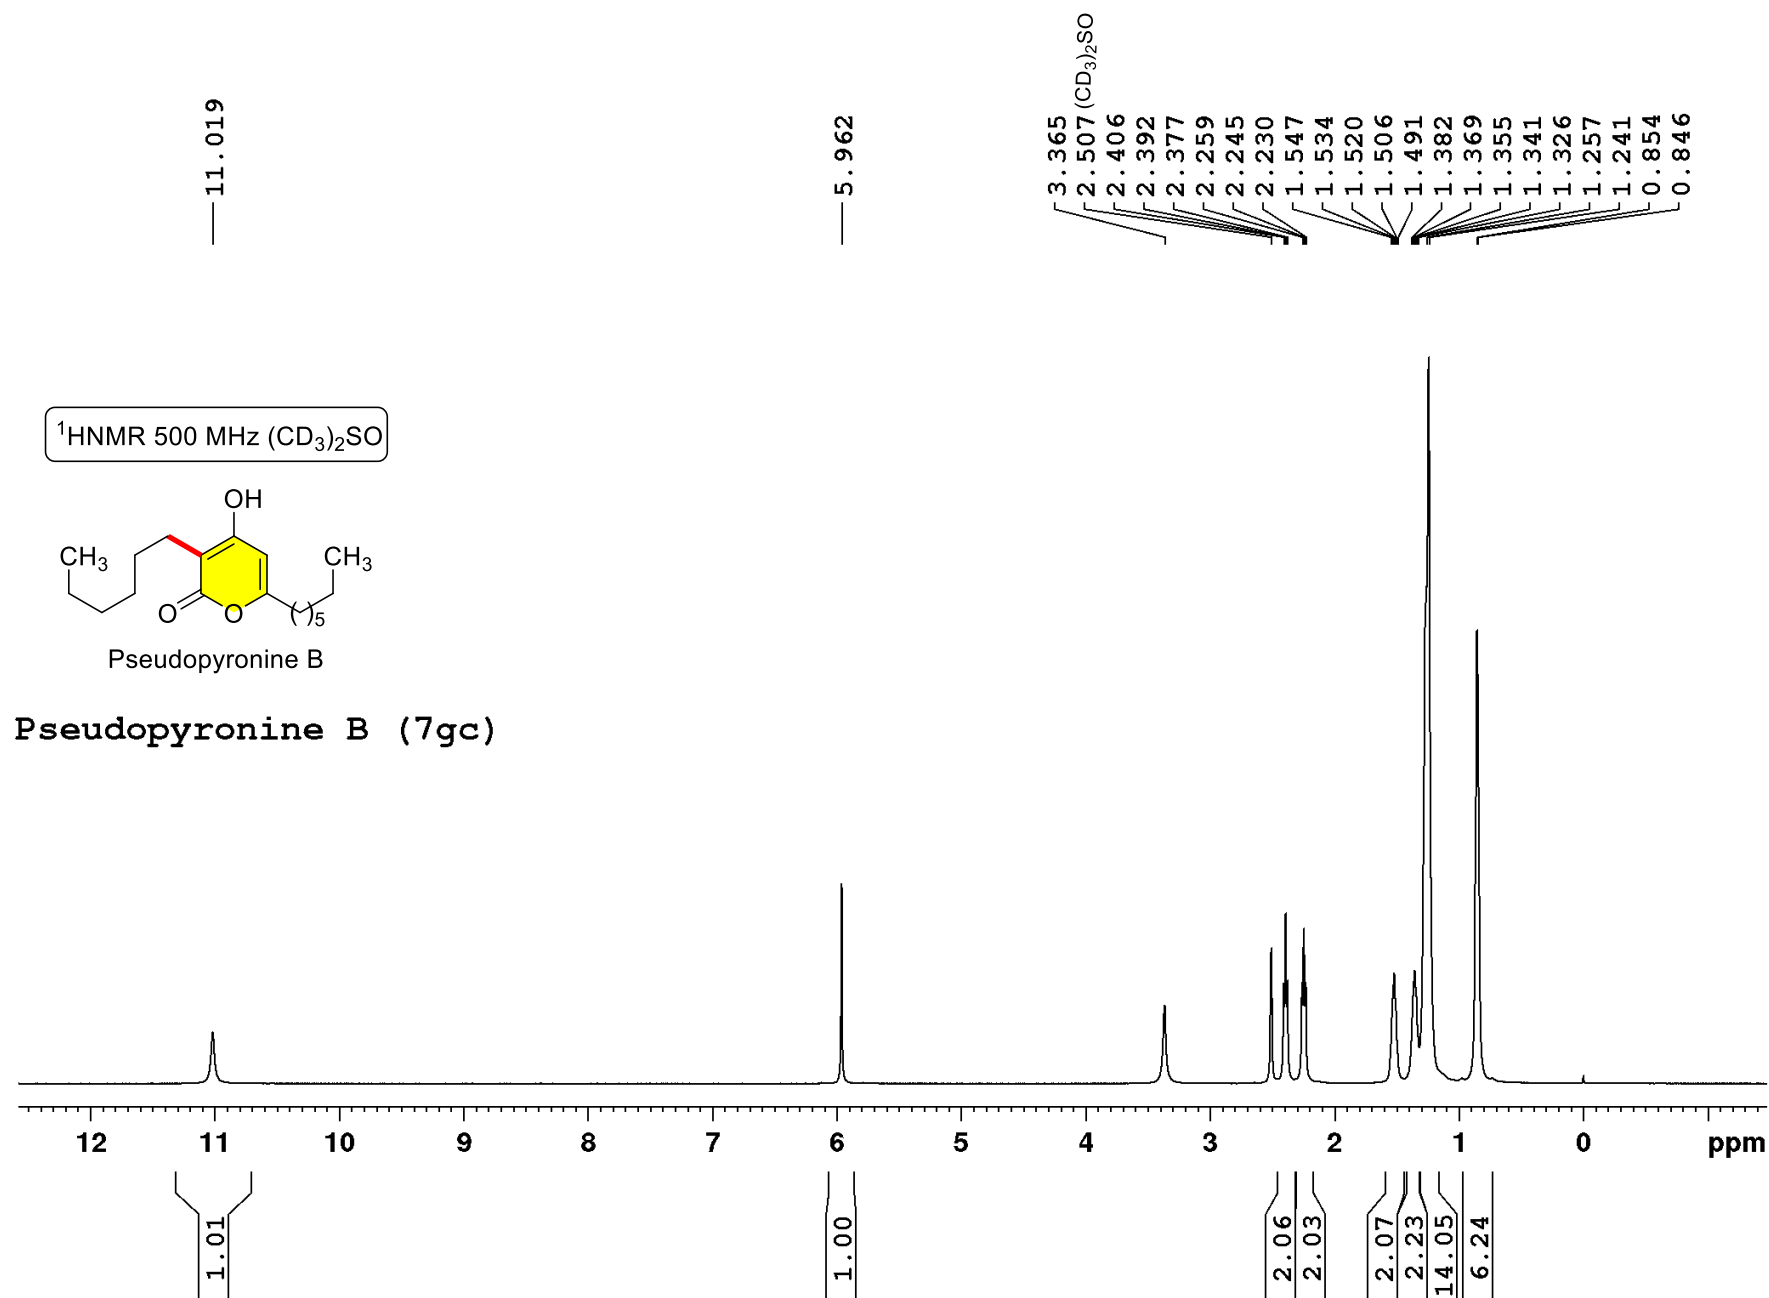

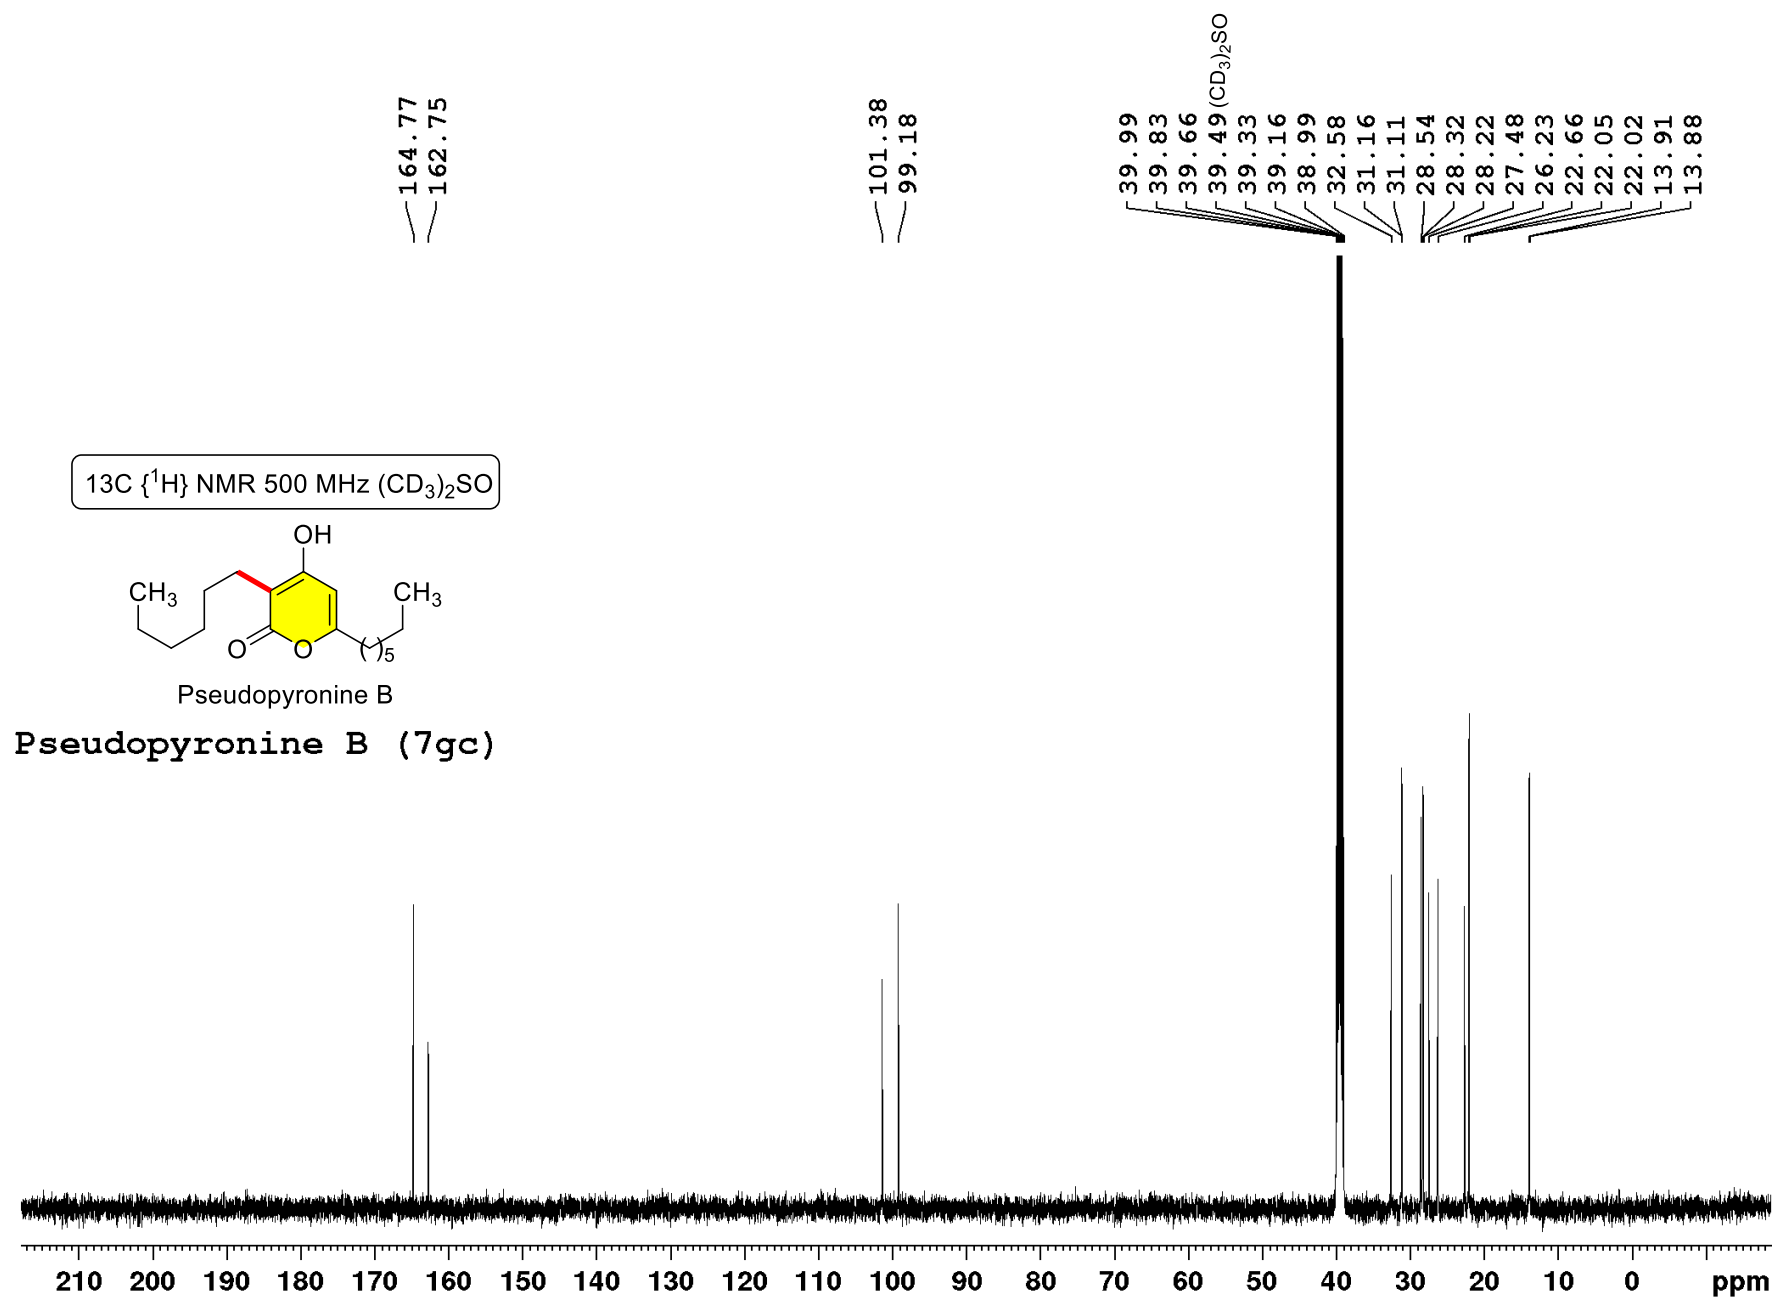

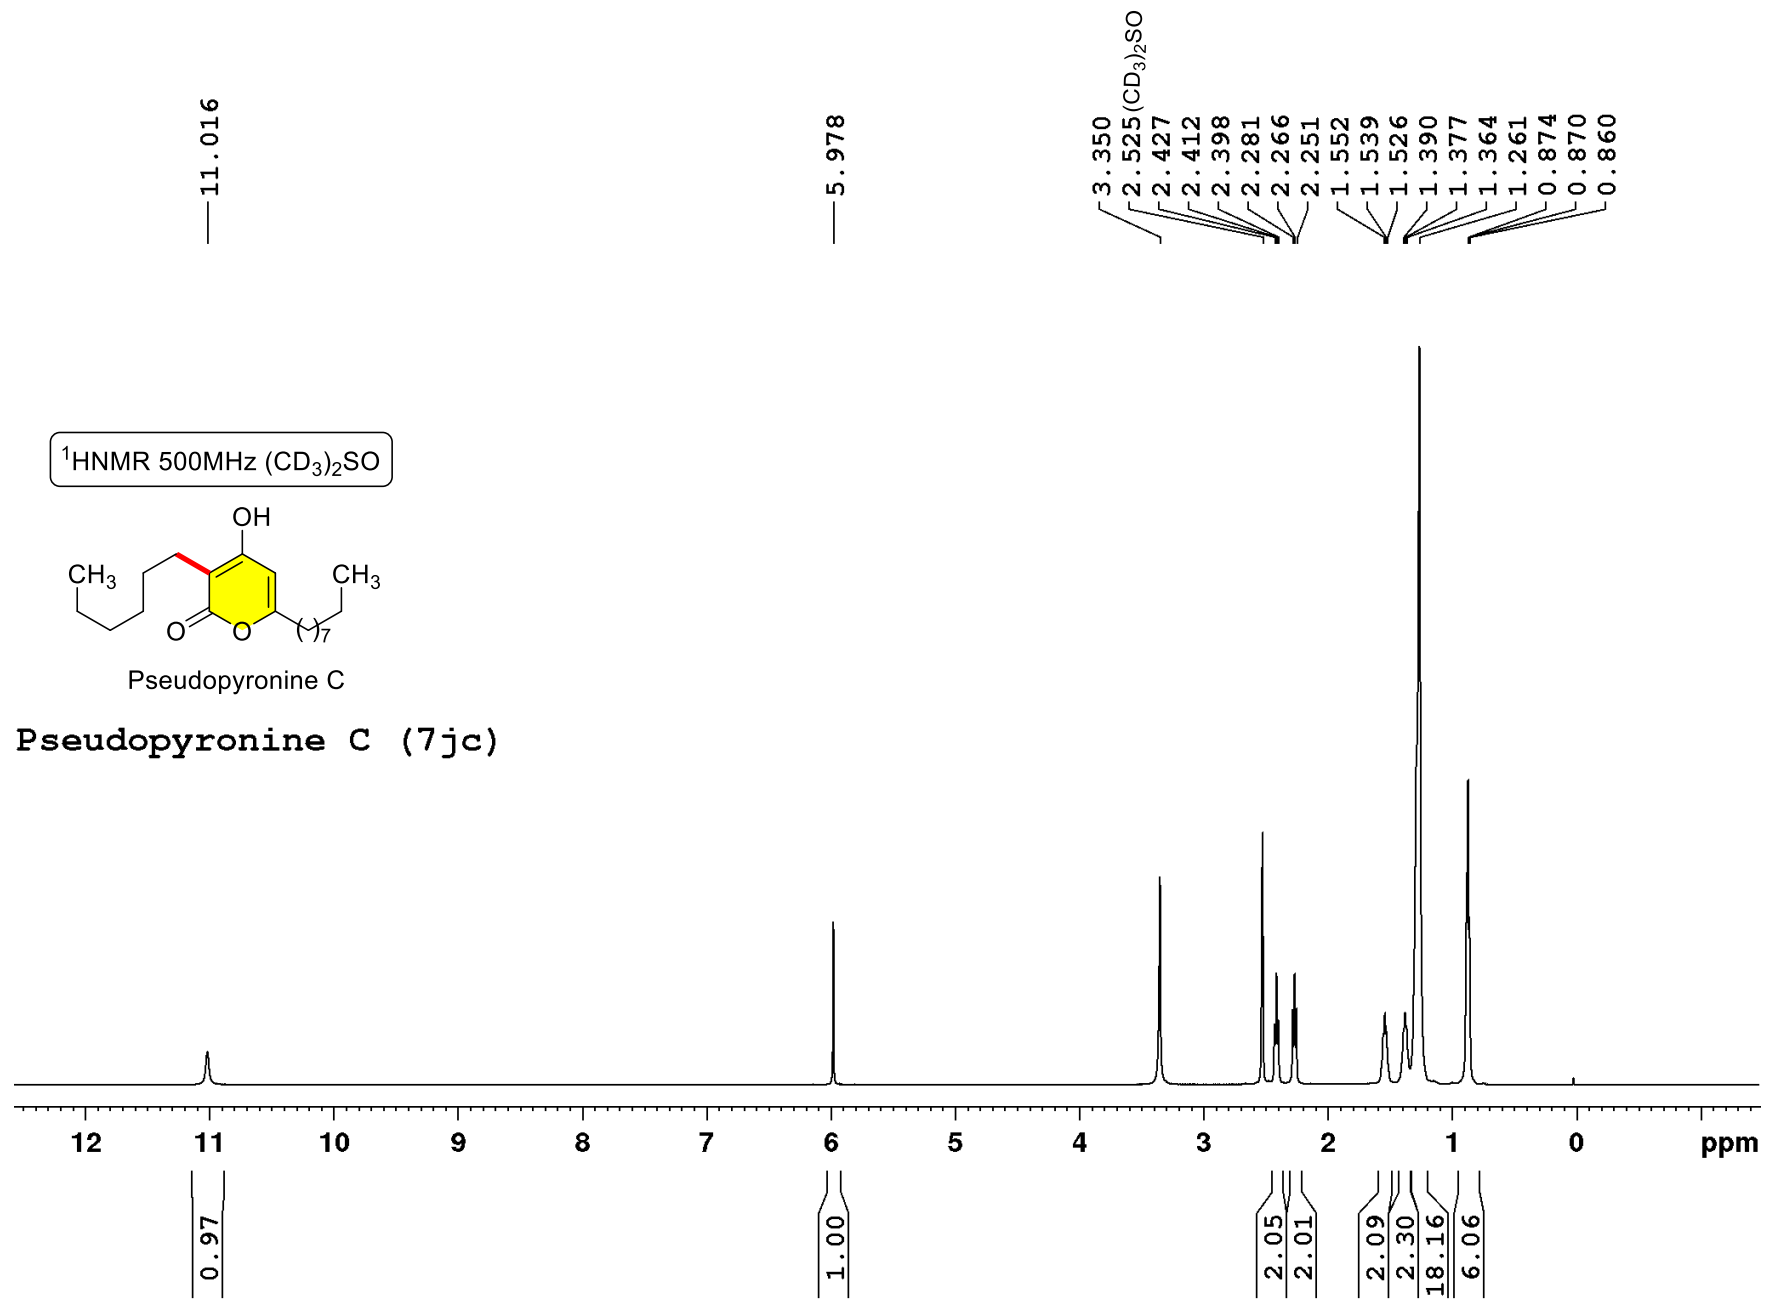

13C {1H} NMR 500MHz (CD3)2SO

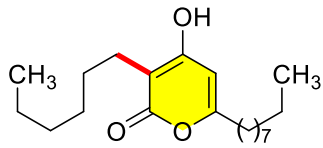

Pseudopyronine C

Pseudopyronine C (7jc)

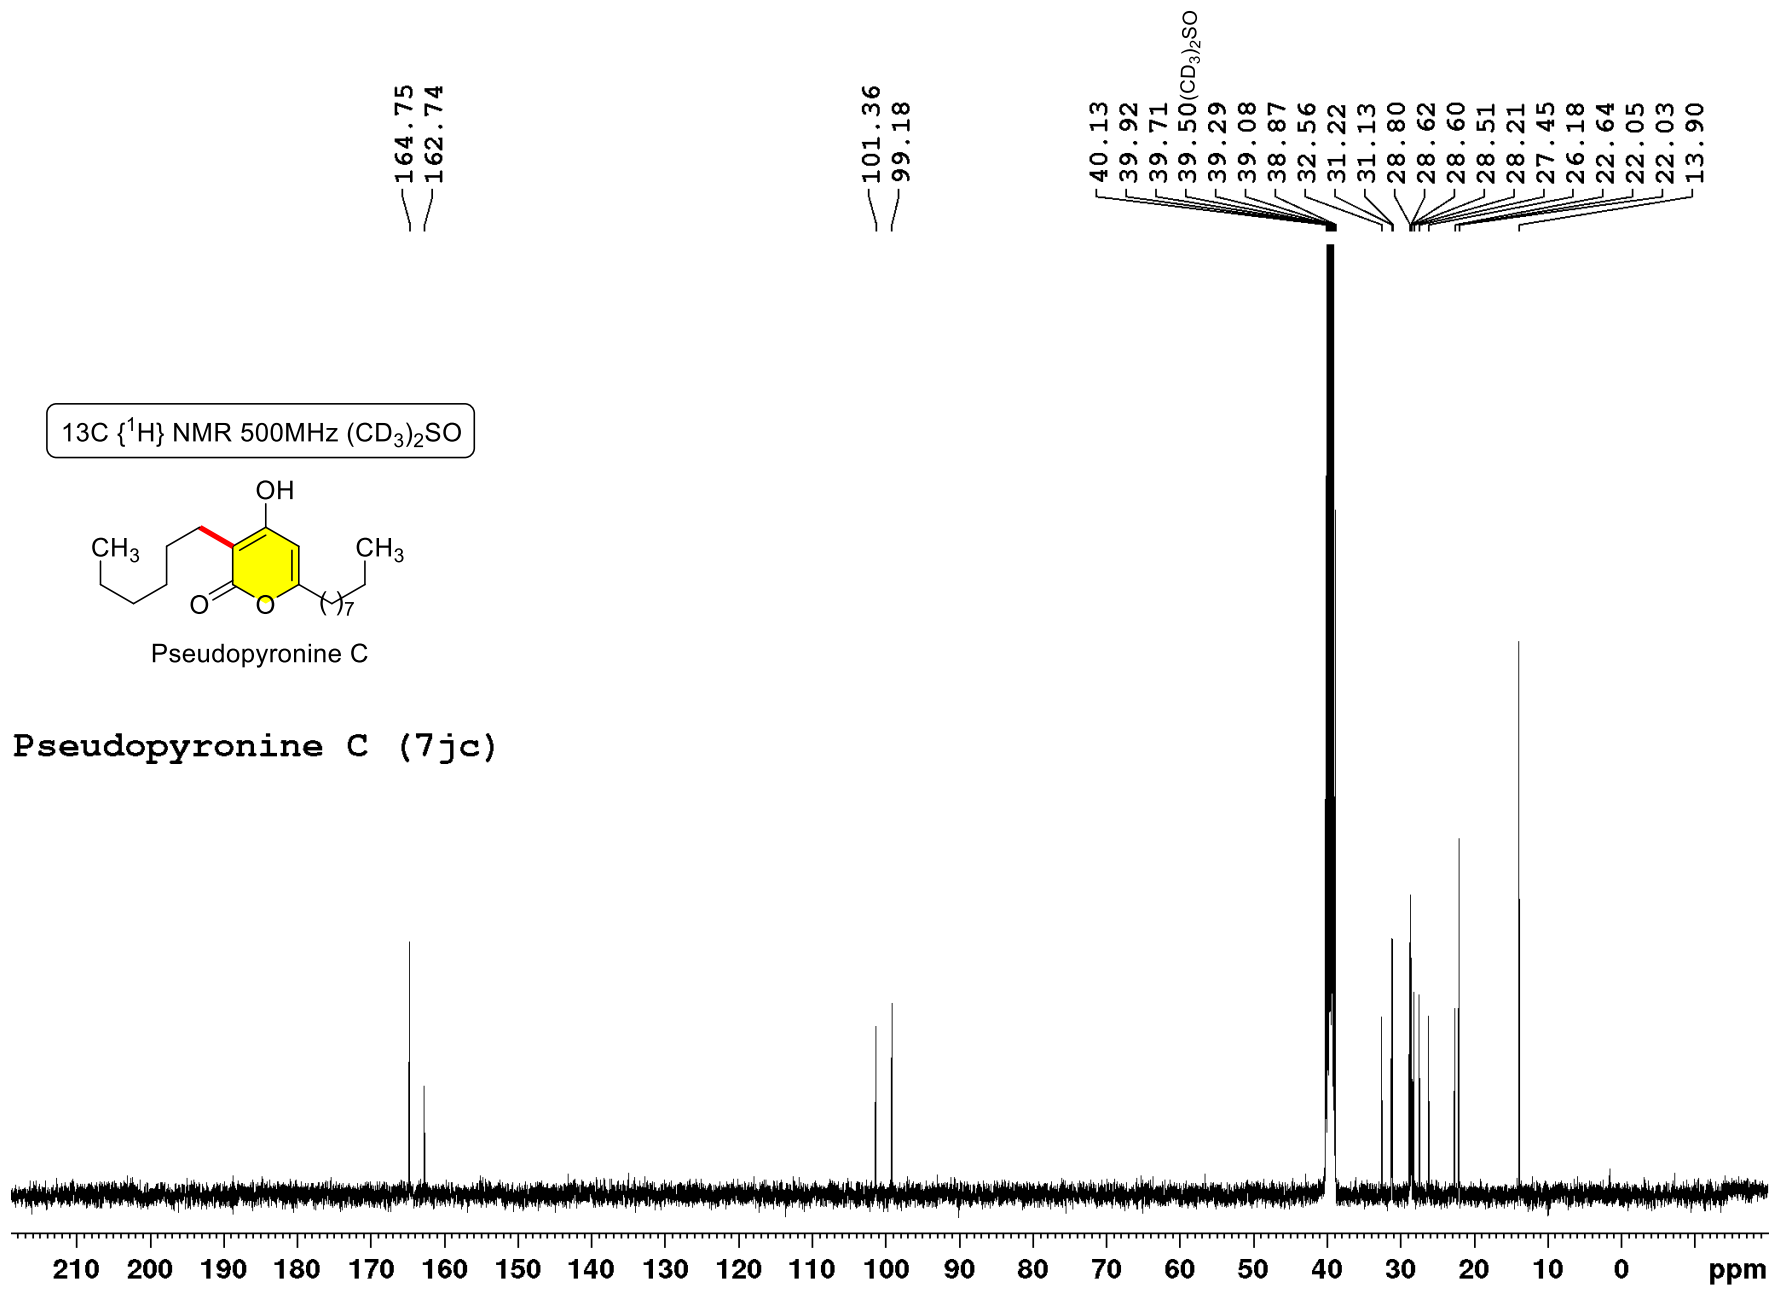

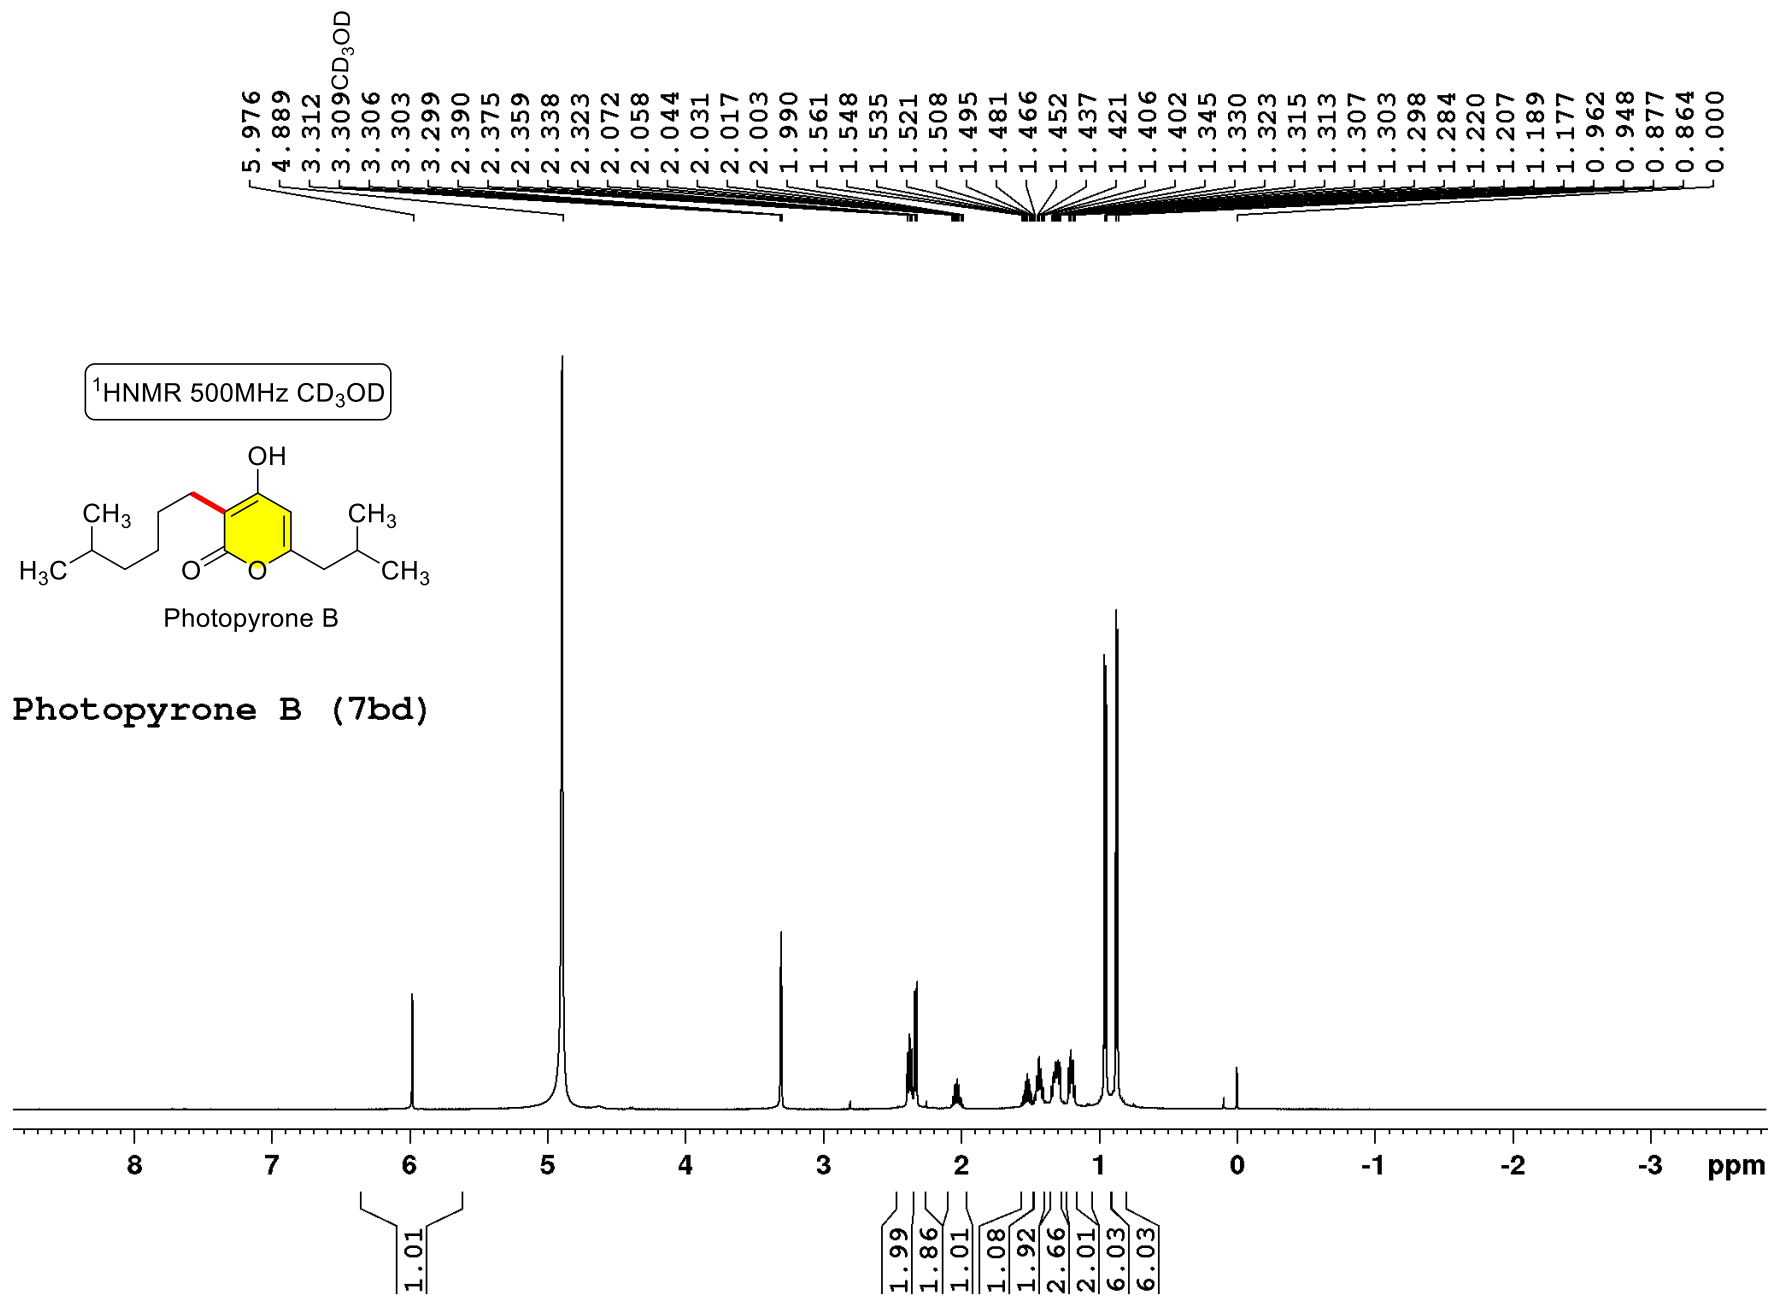

13C {1H} NMR 400 MHz CD<sub>3</sub>OD

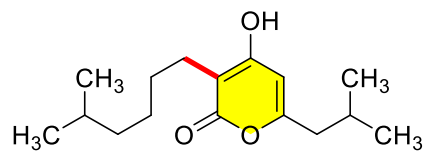

Photopyrone B

Photopyrone B (7bd)

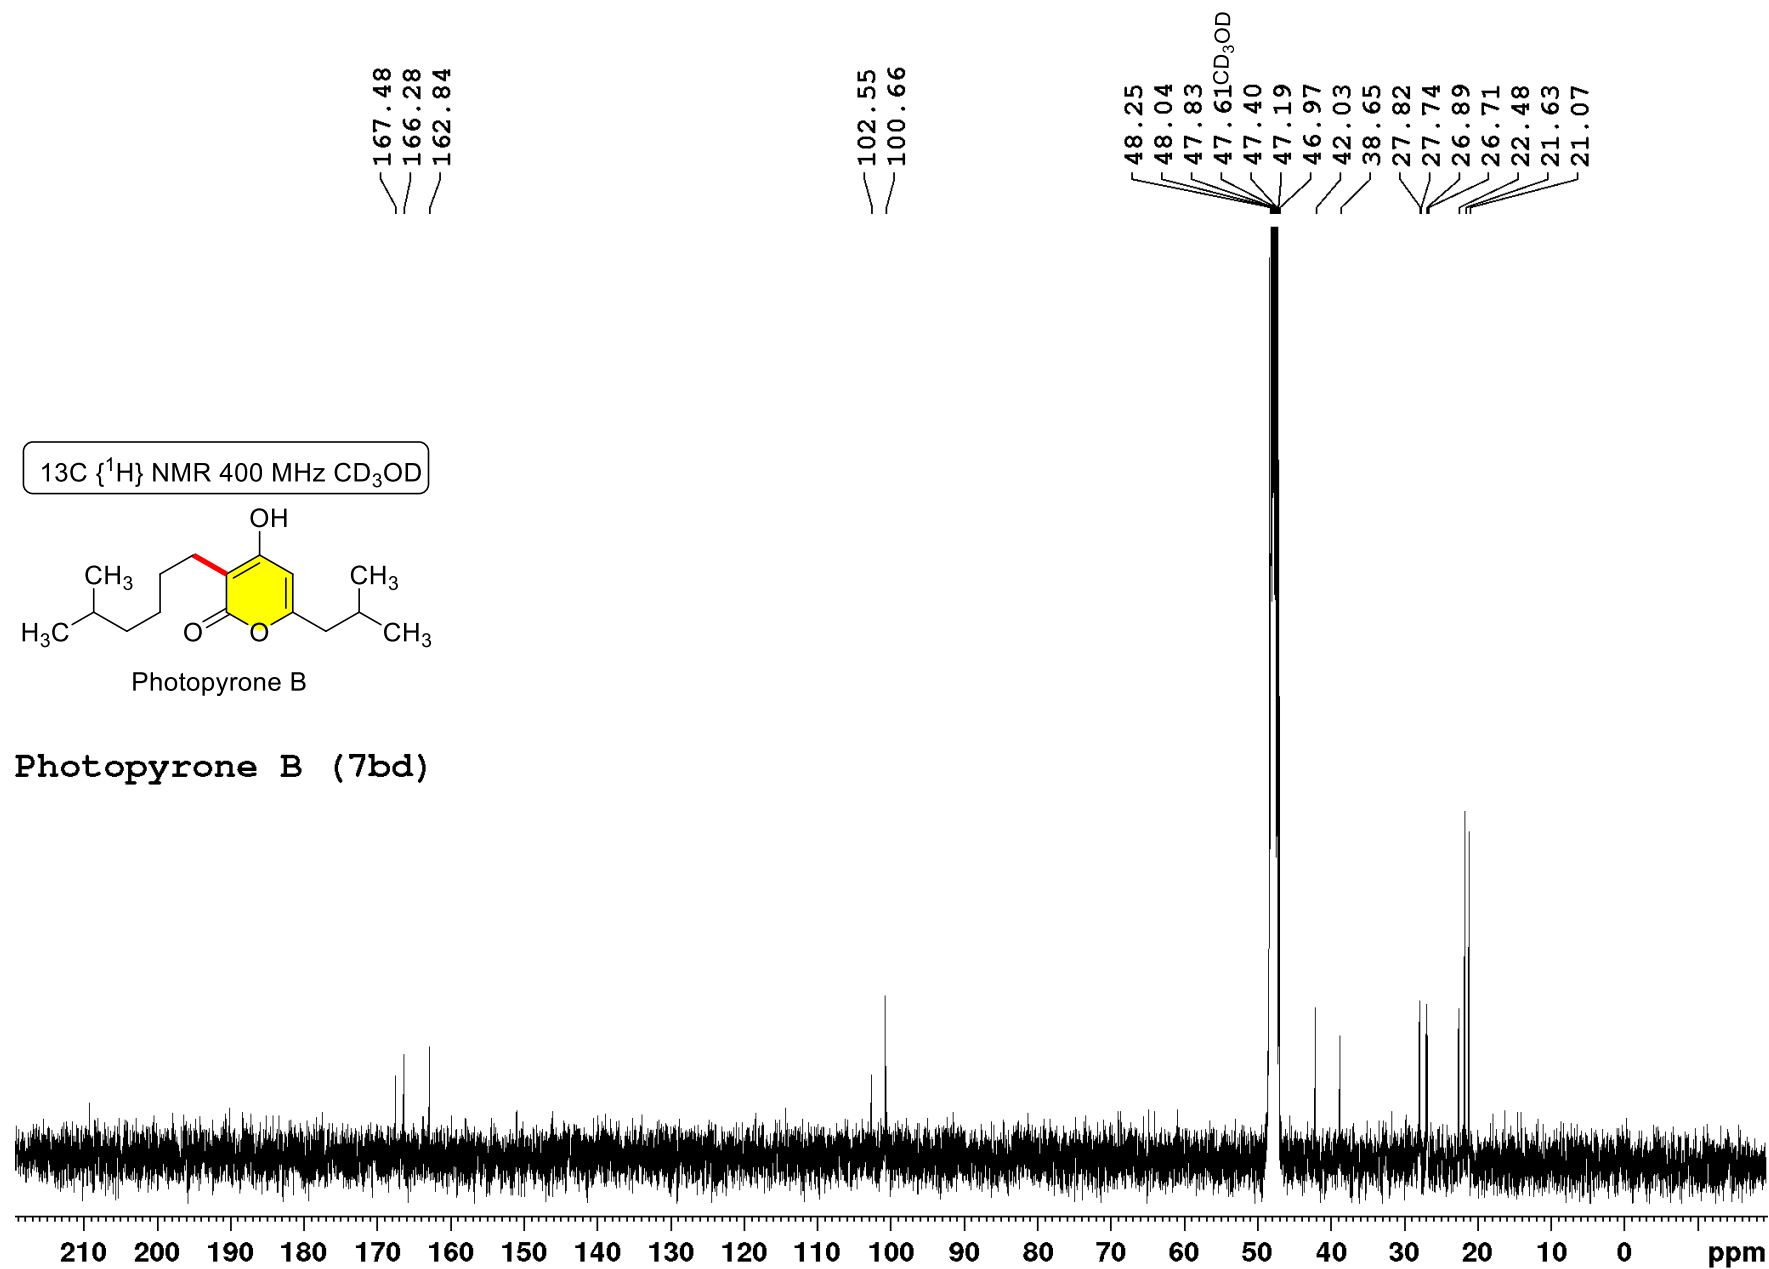

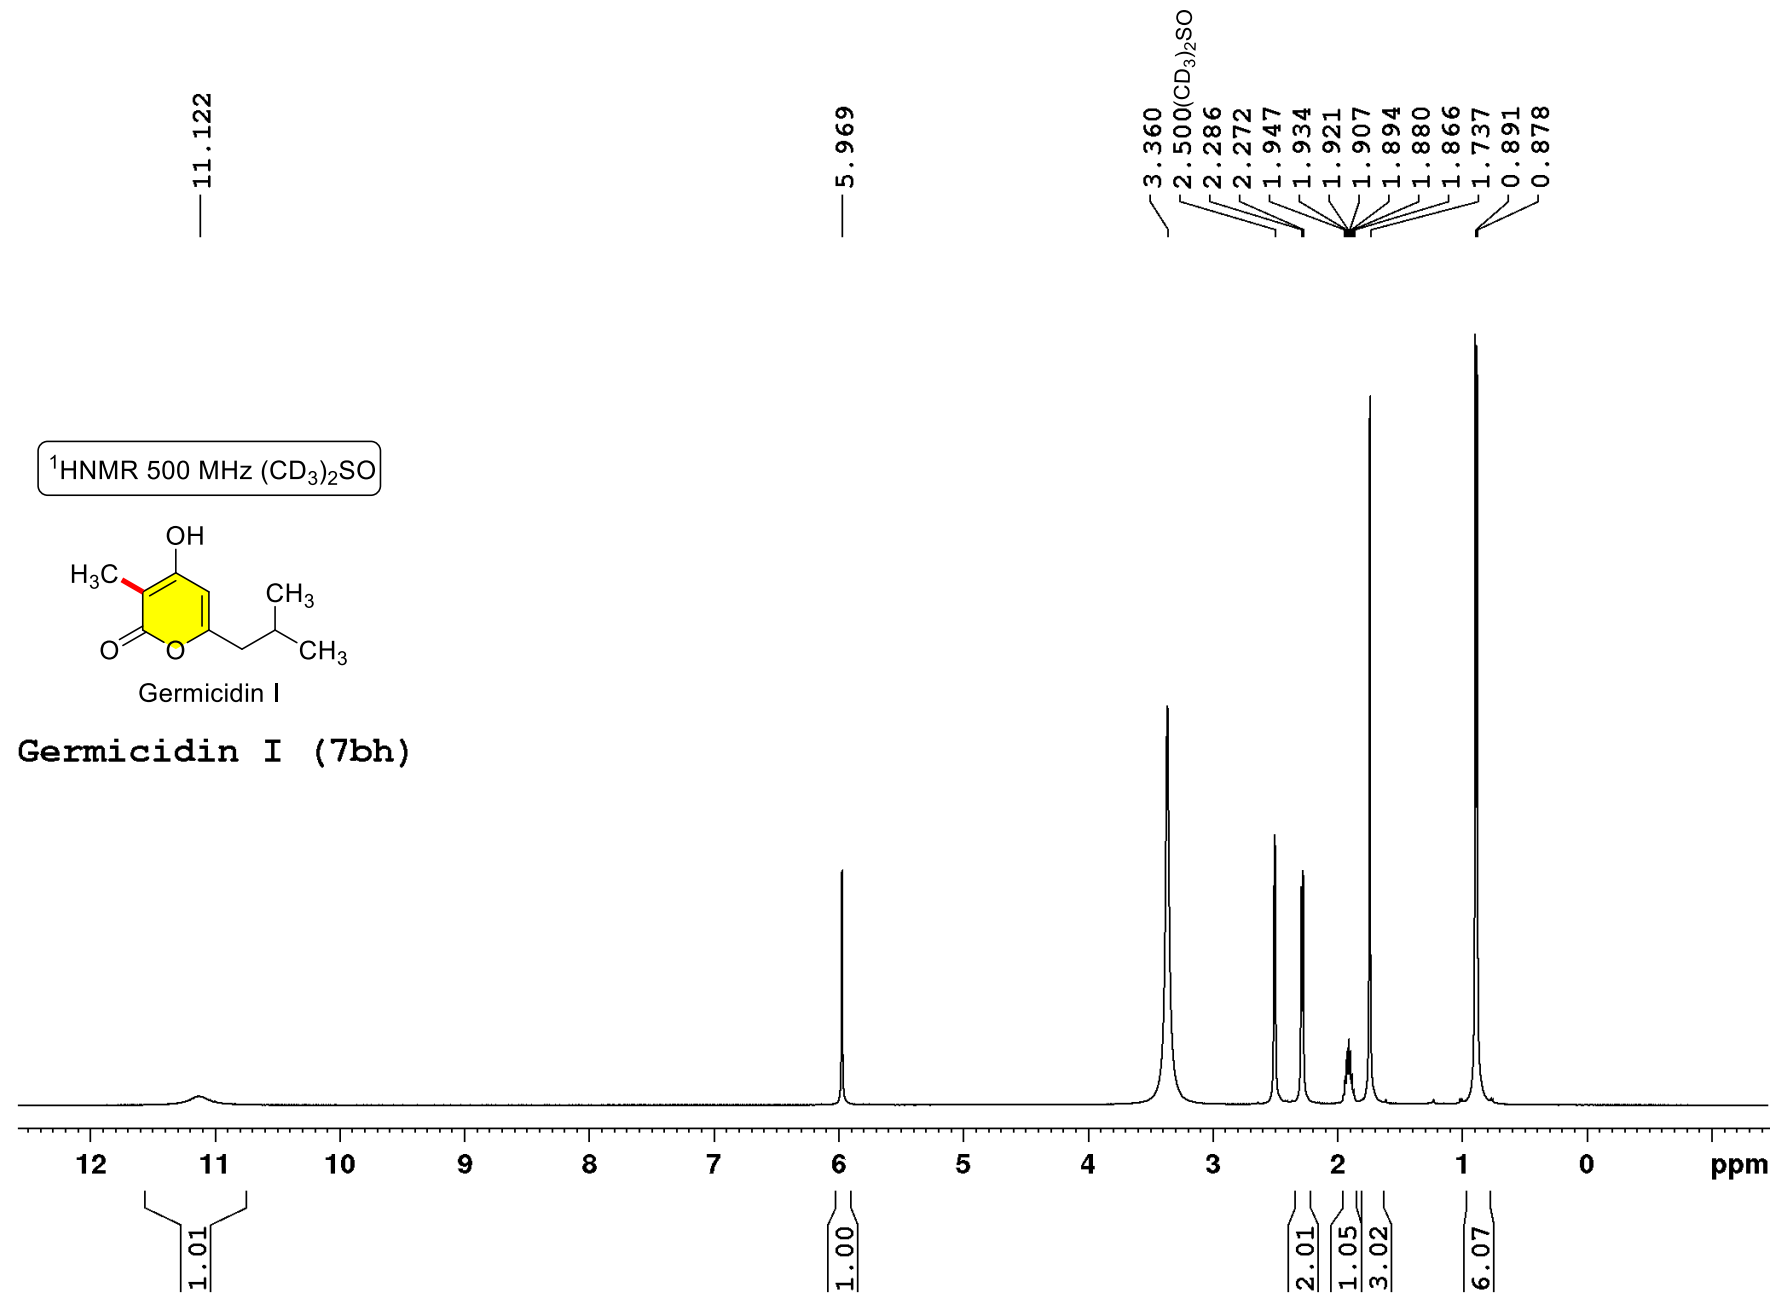



13C {1H} NMR 400 MHz (CD3)2SO

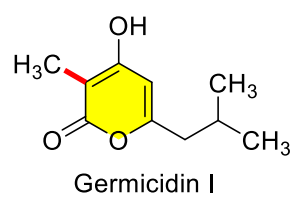

Germicidin I (7bh)

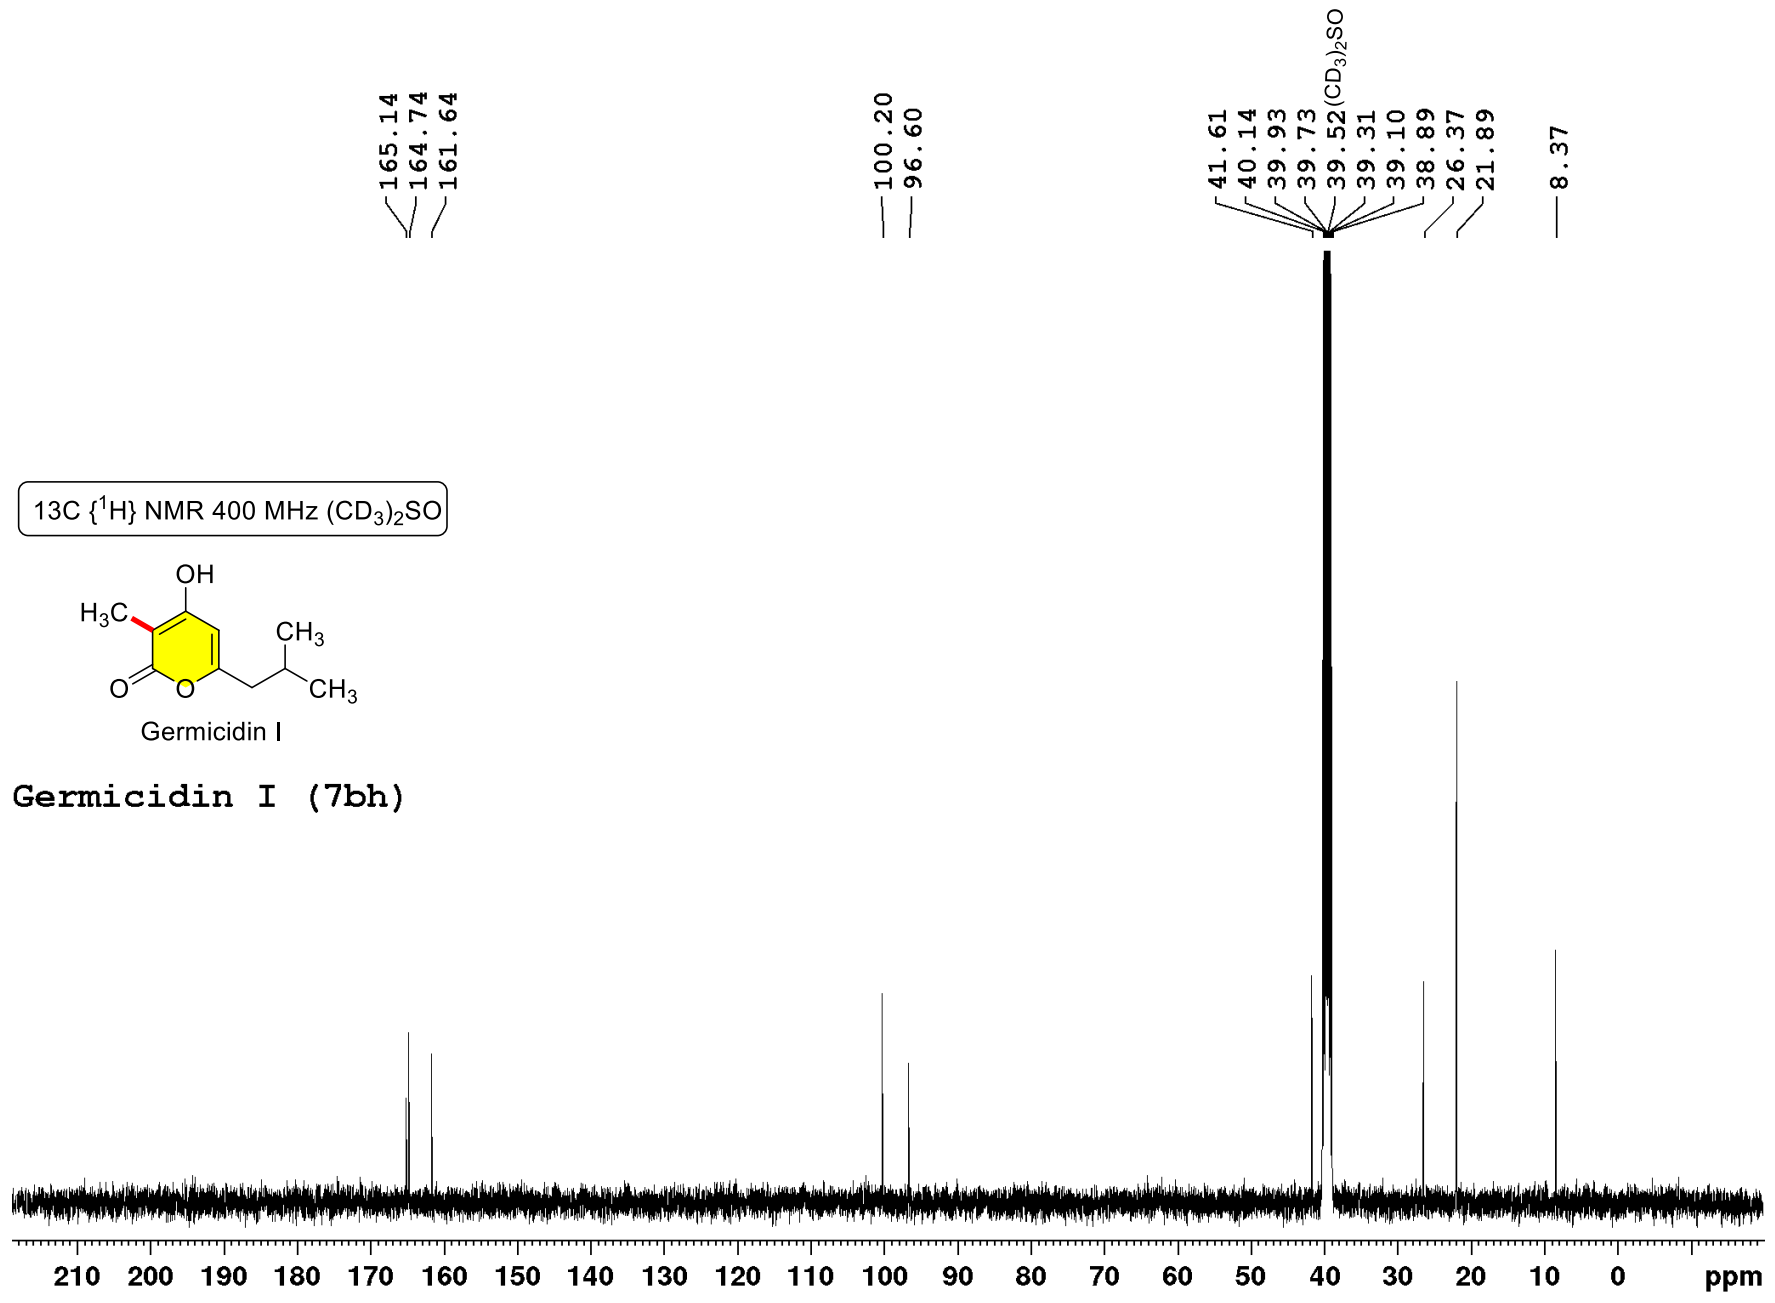

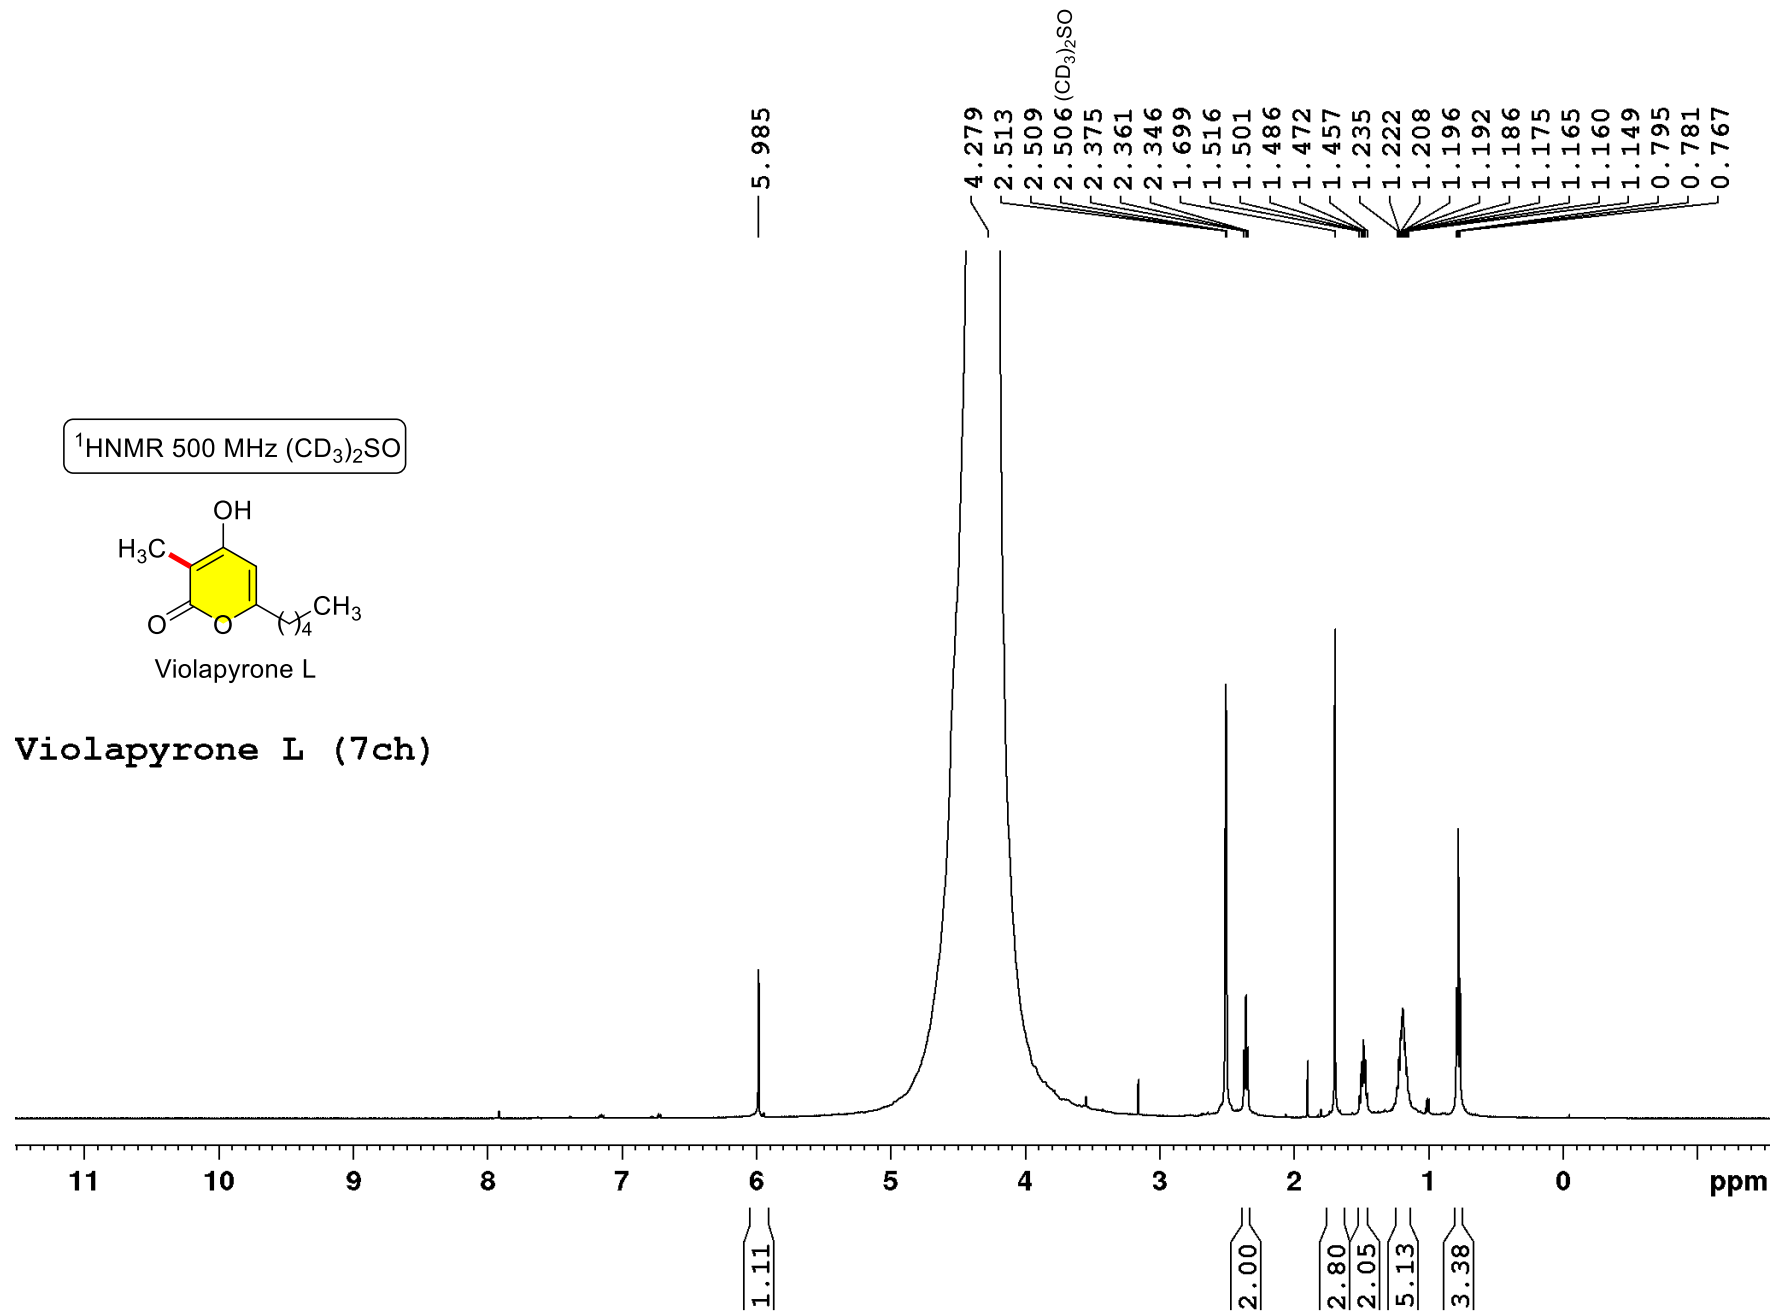

13C {1H} NMR 500 MHz (CD3)2SO

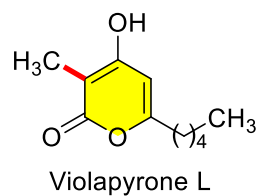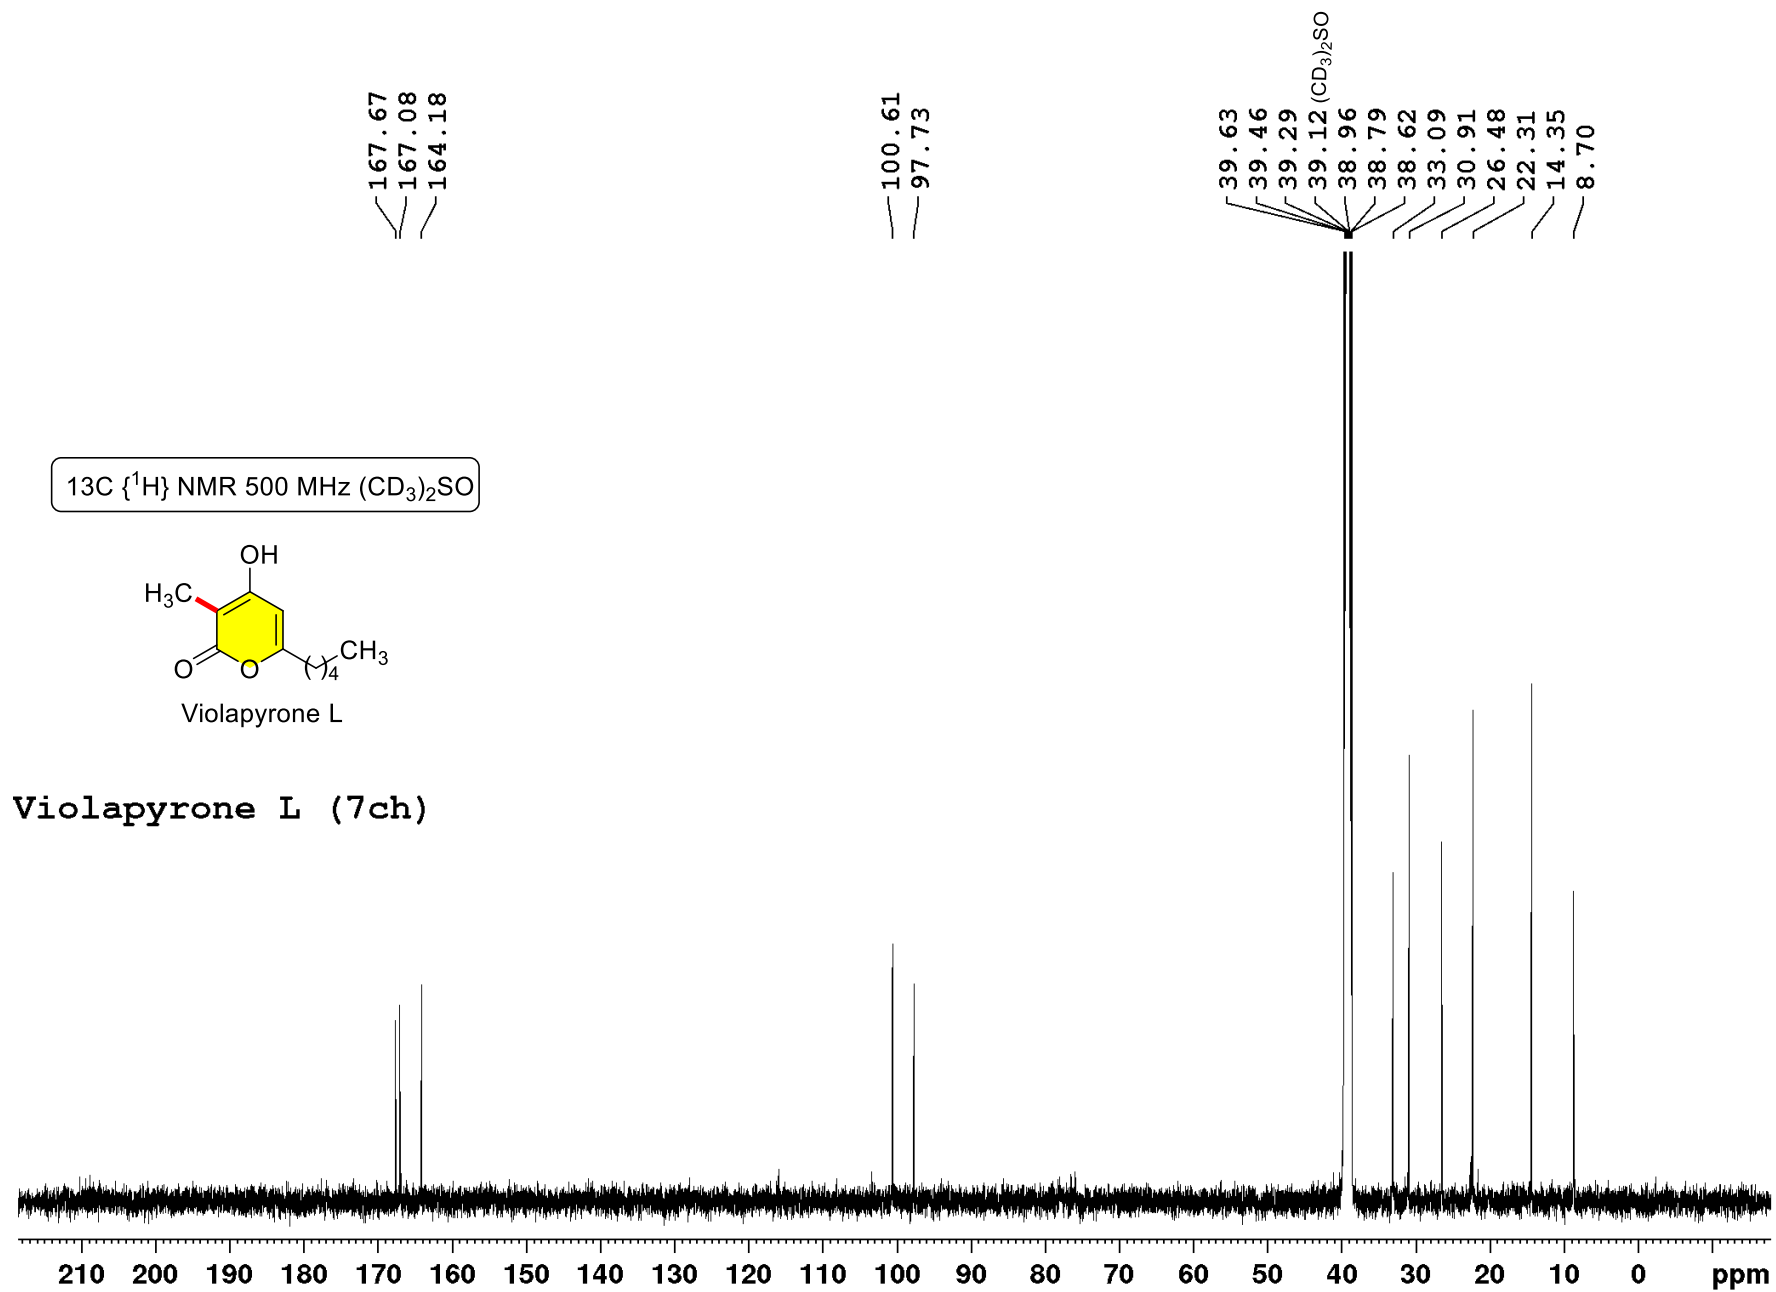

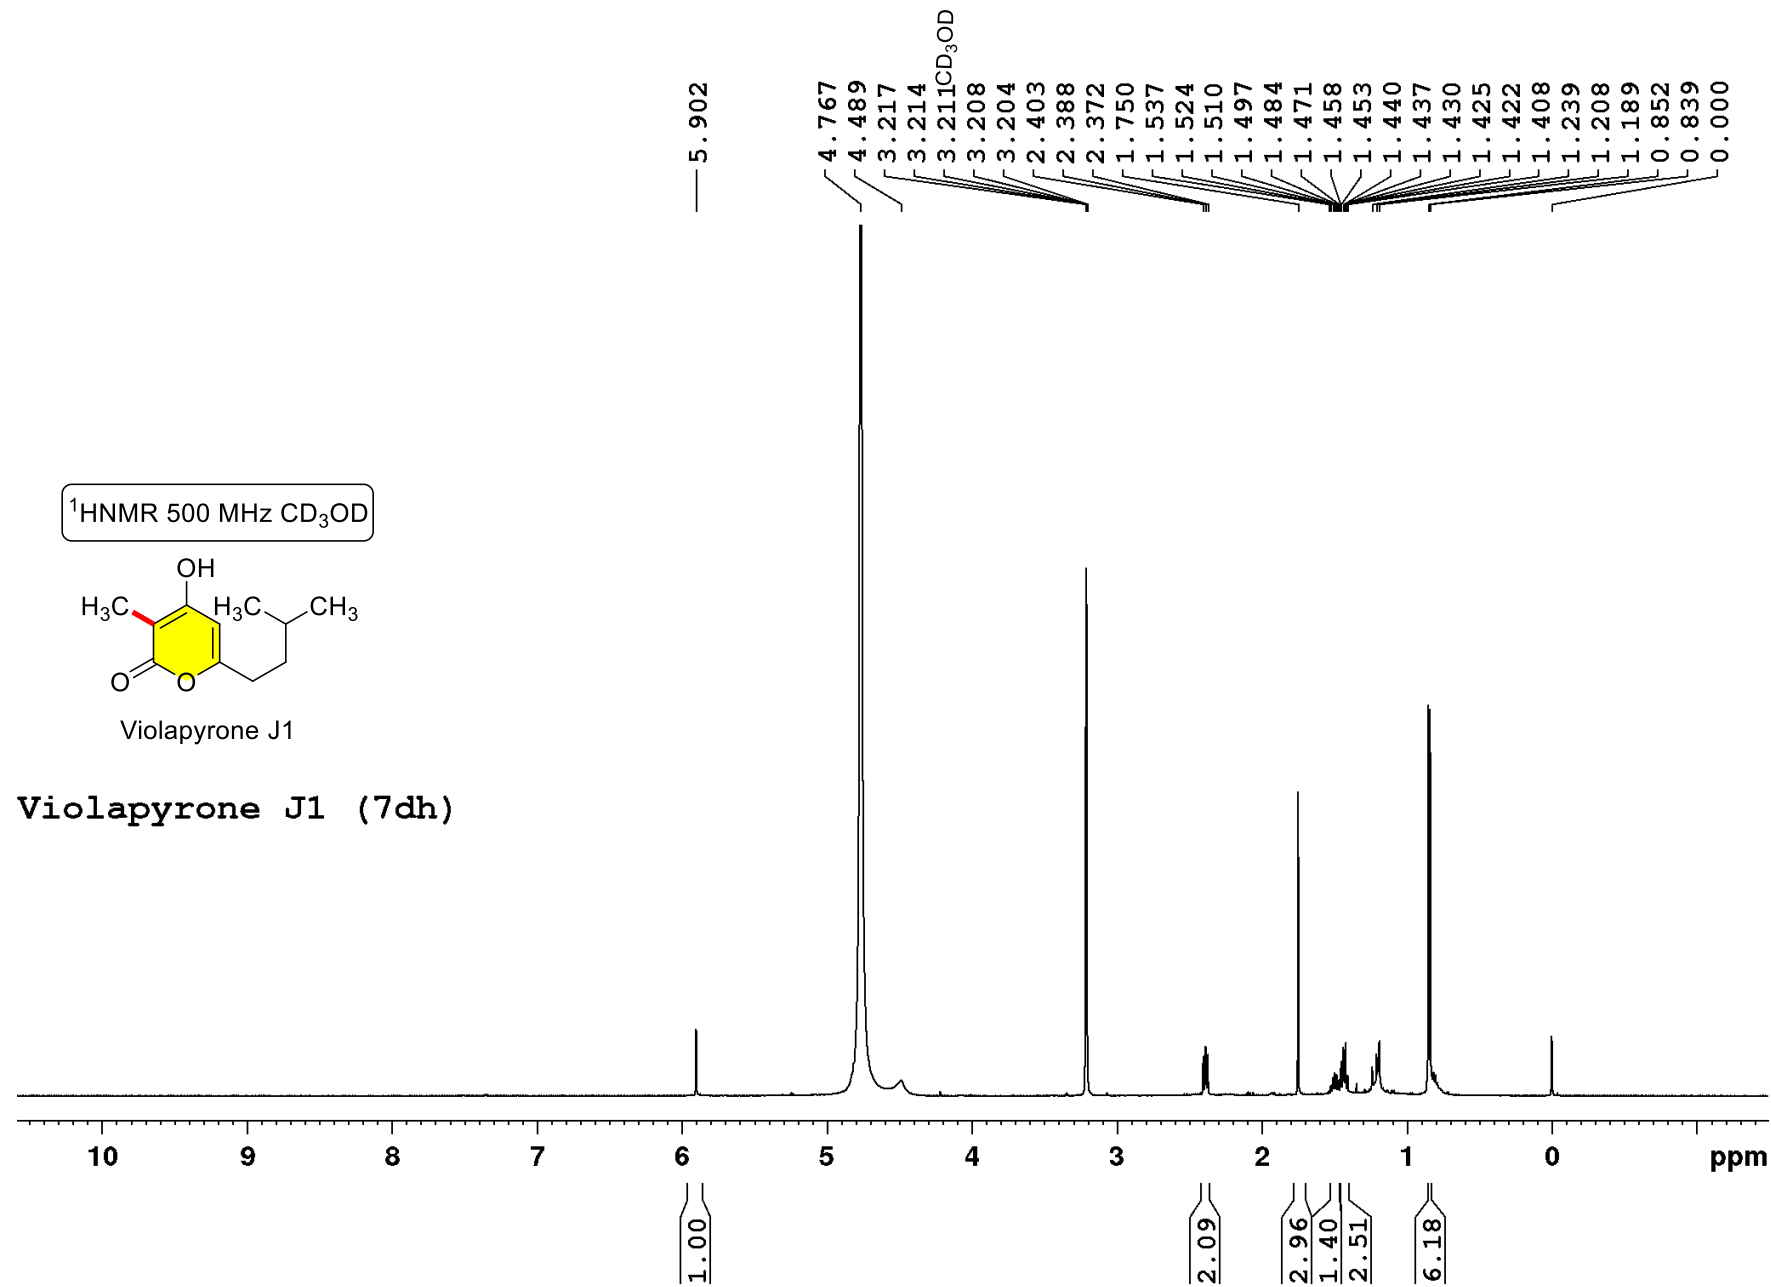

13C {1H} NMR 400 MHz CD3OD

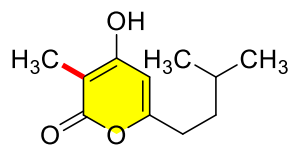

Violapyrone J1

Violapyrone J1 (7dh)

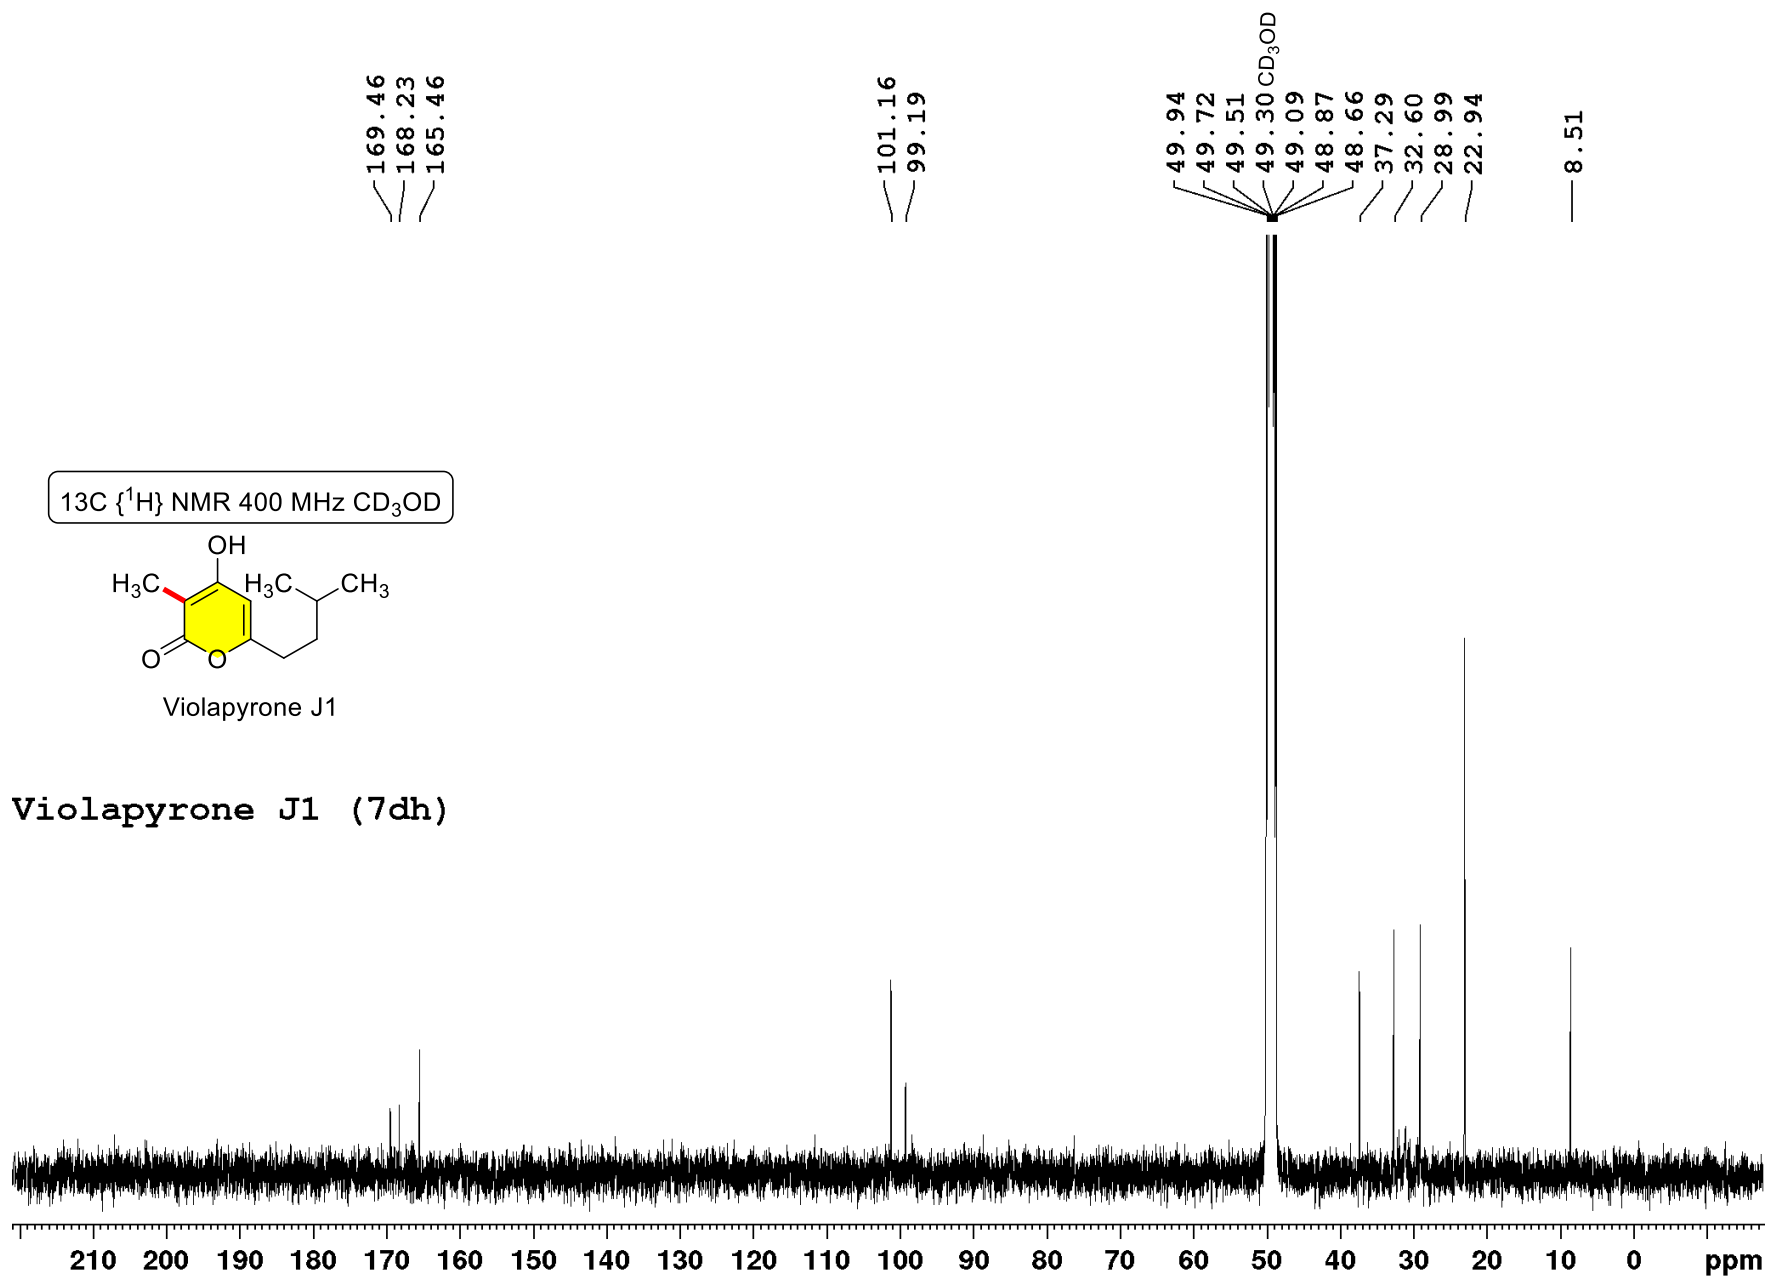

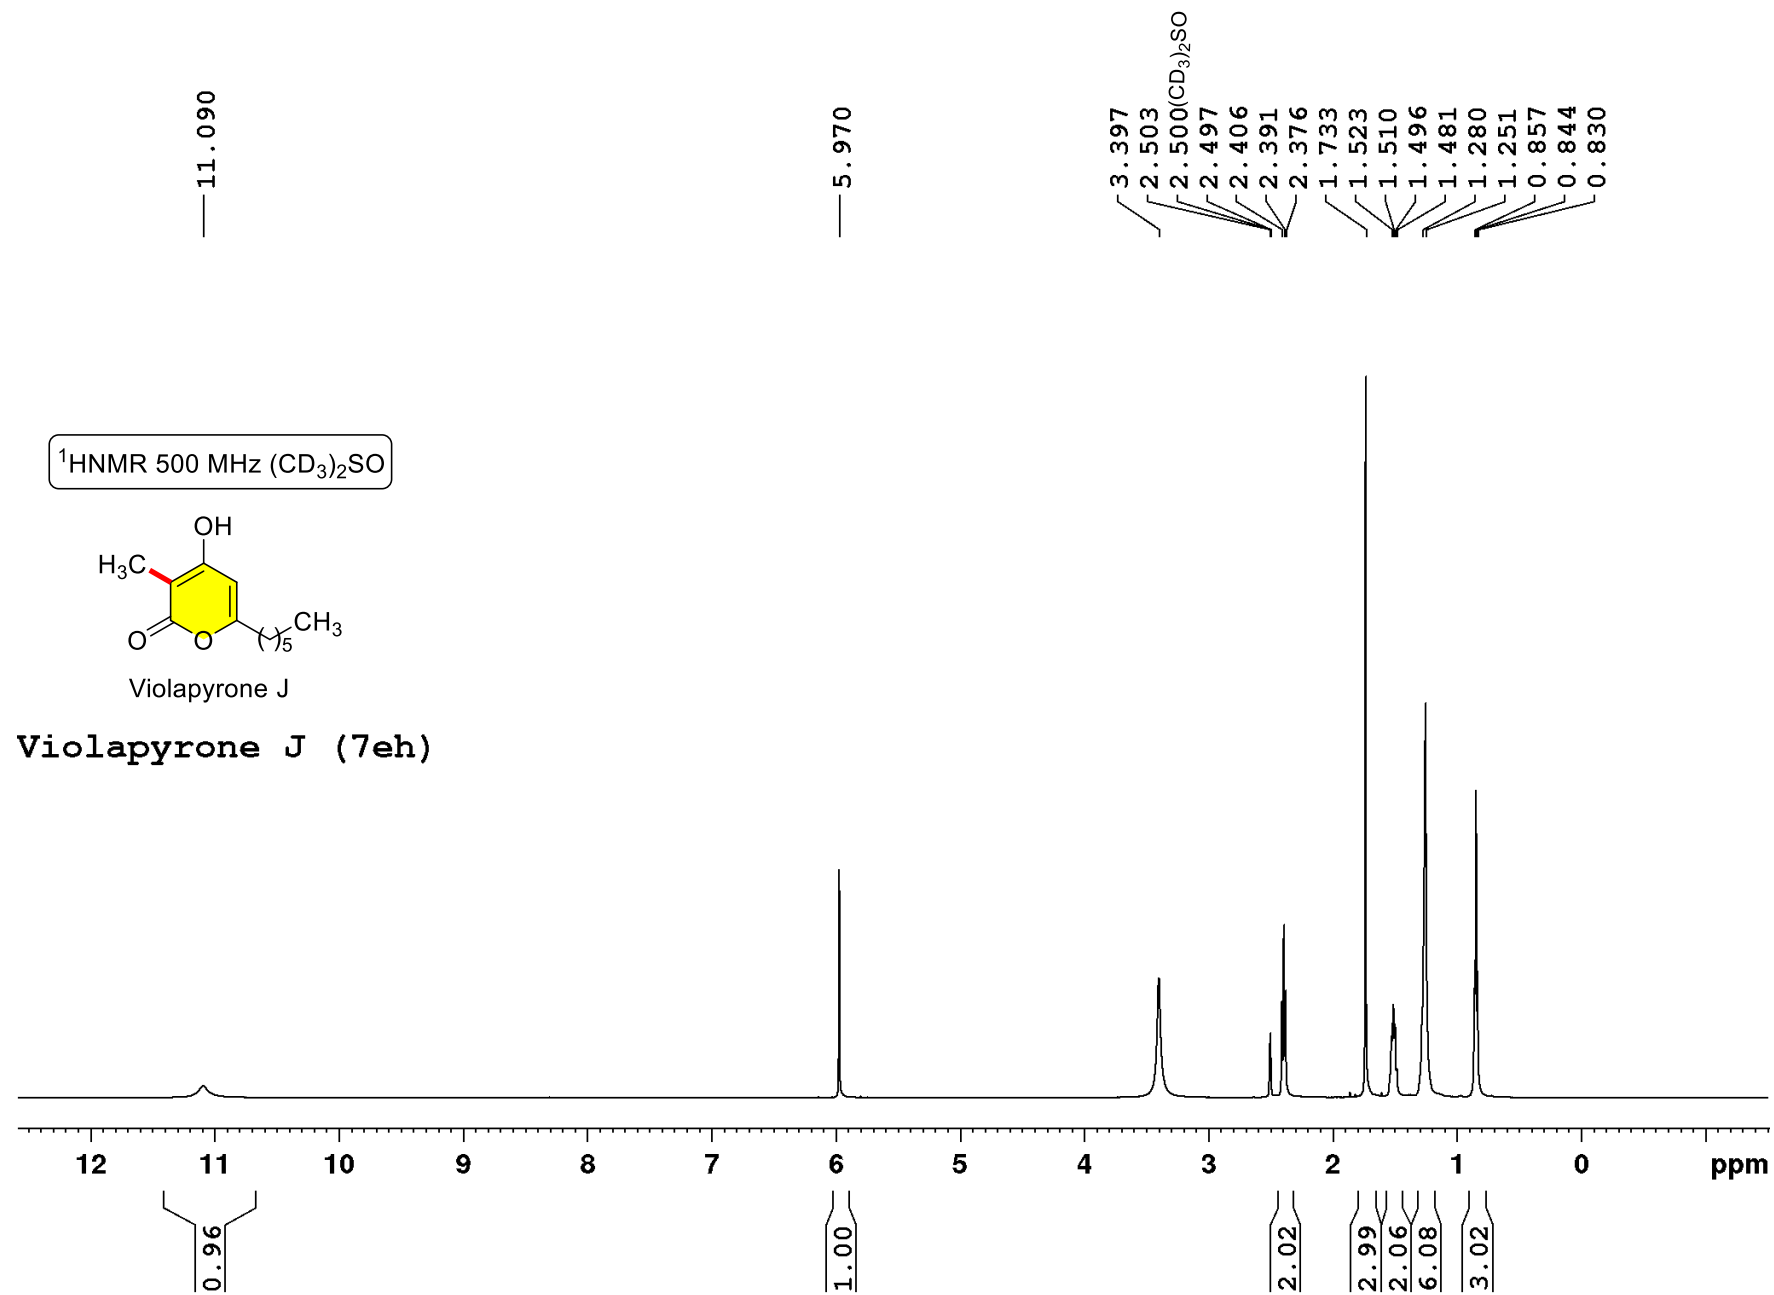

$^{13}\text{C} \{^1\text{H}\}$  NMR 500 MHz  $(\text{CD}_3)_2\text{SO}$

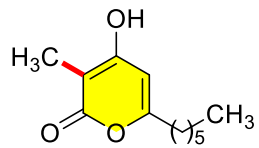

Violapyrone J

Violapyrone J (7eh)

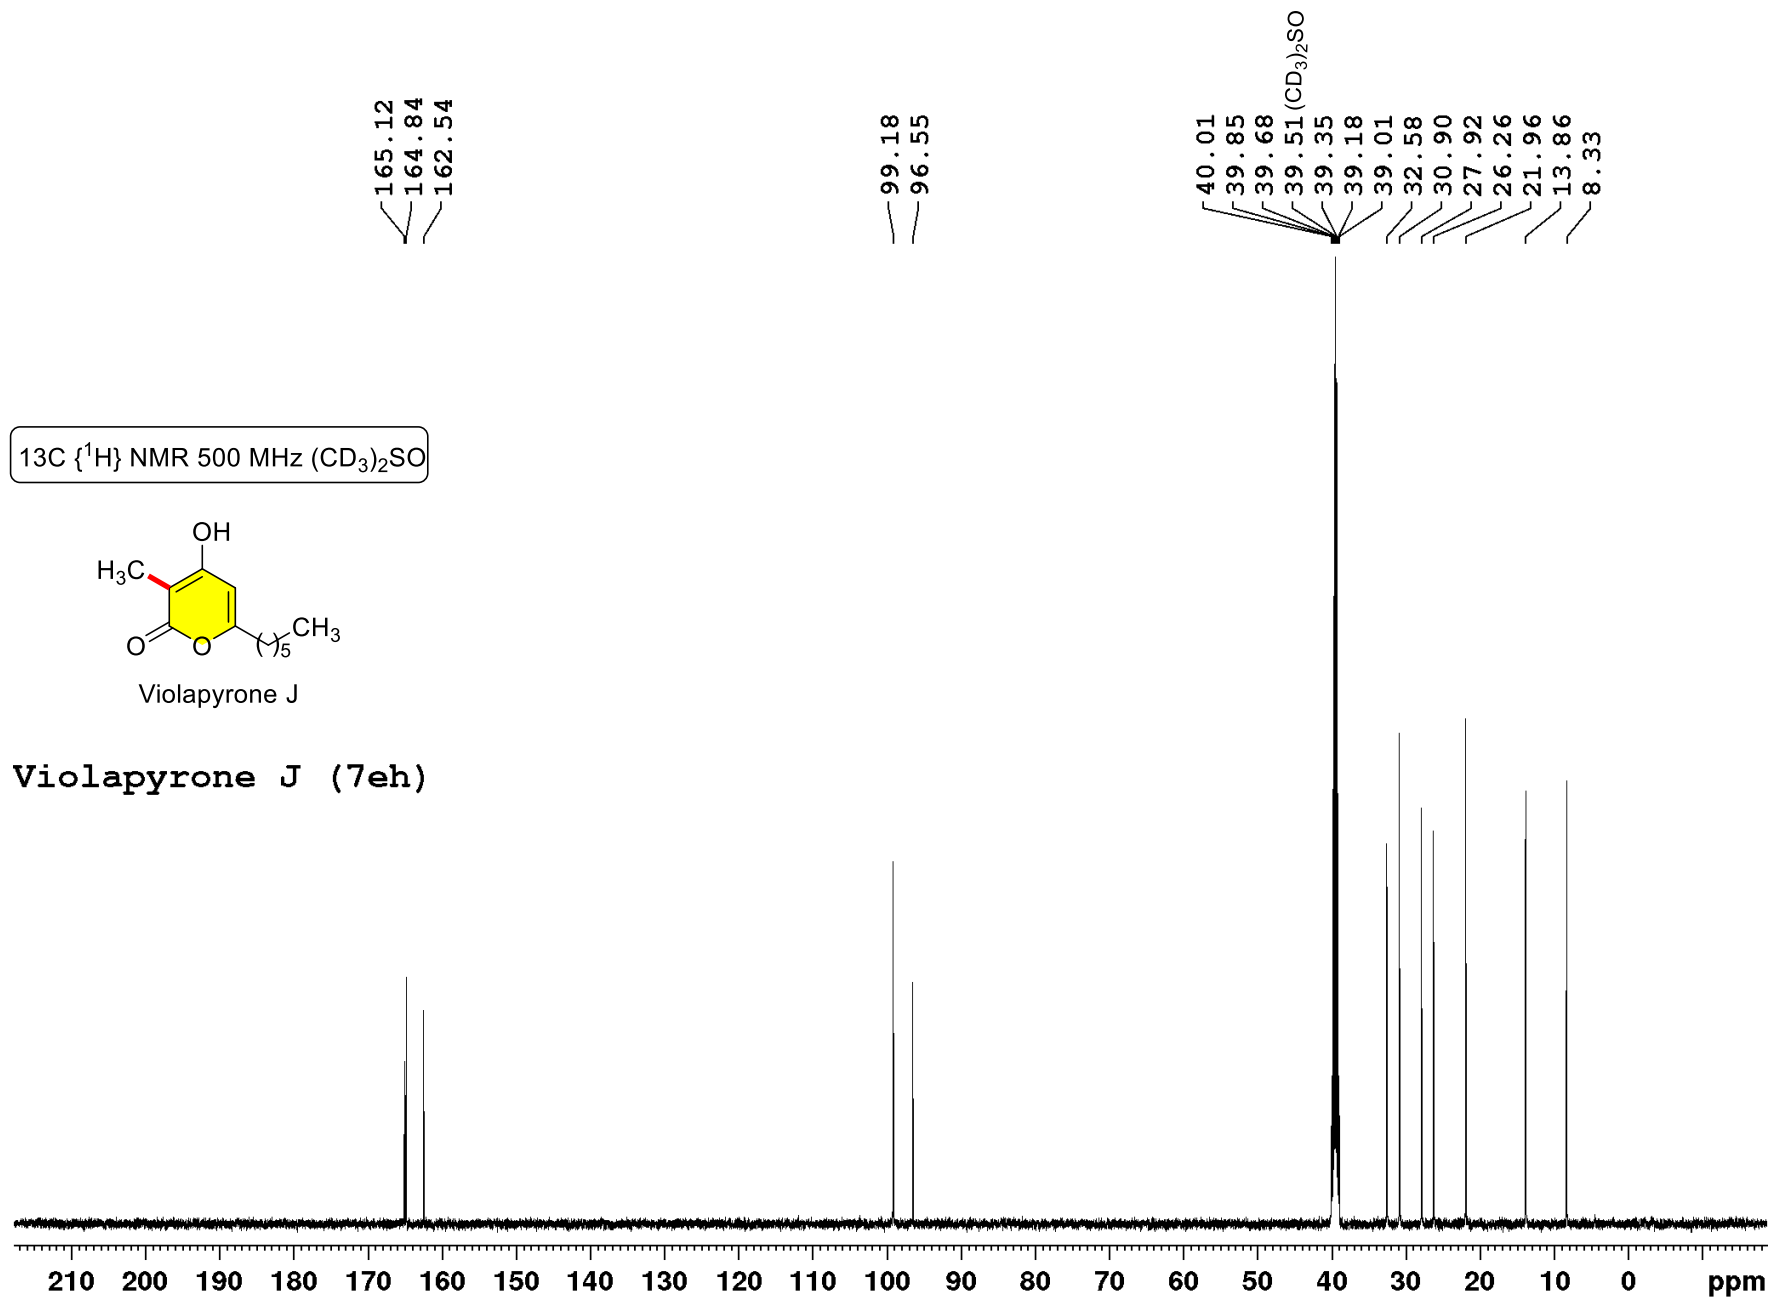

<sup>1</sup>HNMR 500 MHz (CD<sub>3</sub>)<sub>2</sub>SO

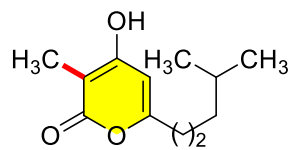

Violapyrone A

Violapyrone A (7fh)

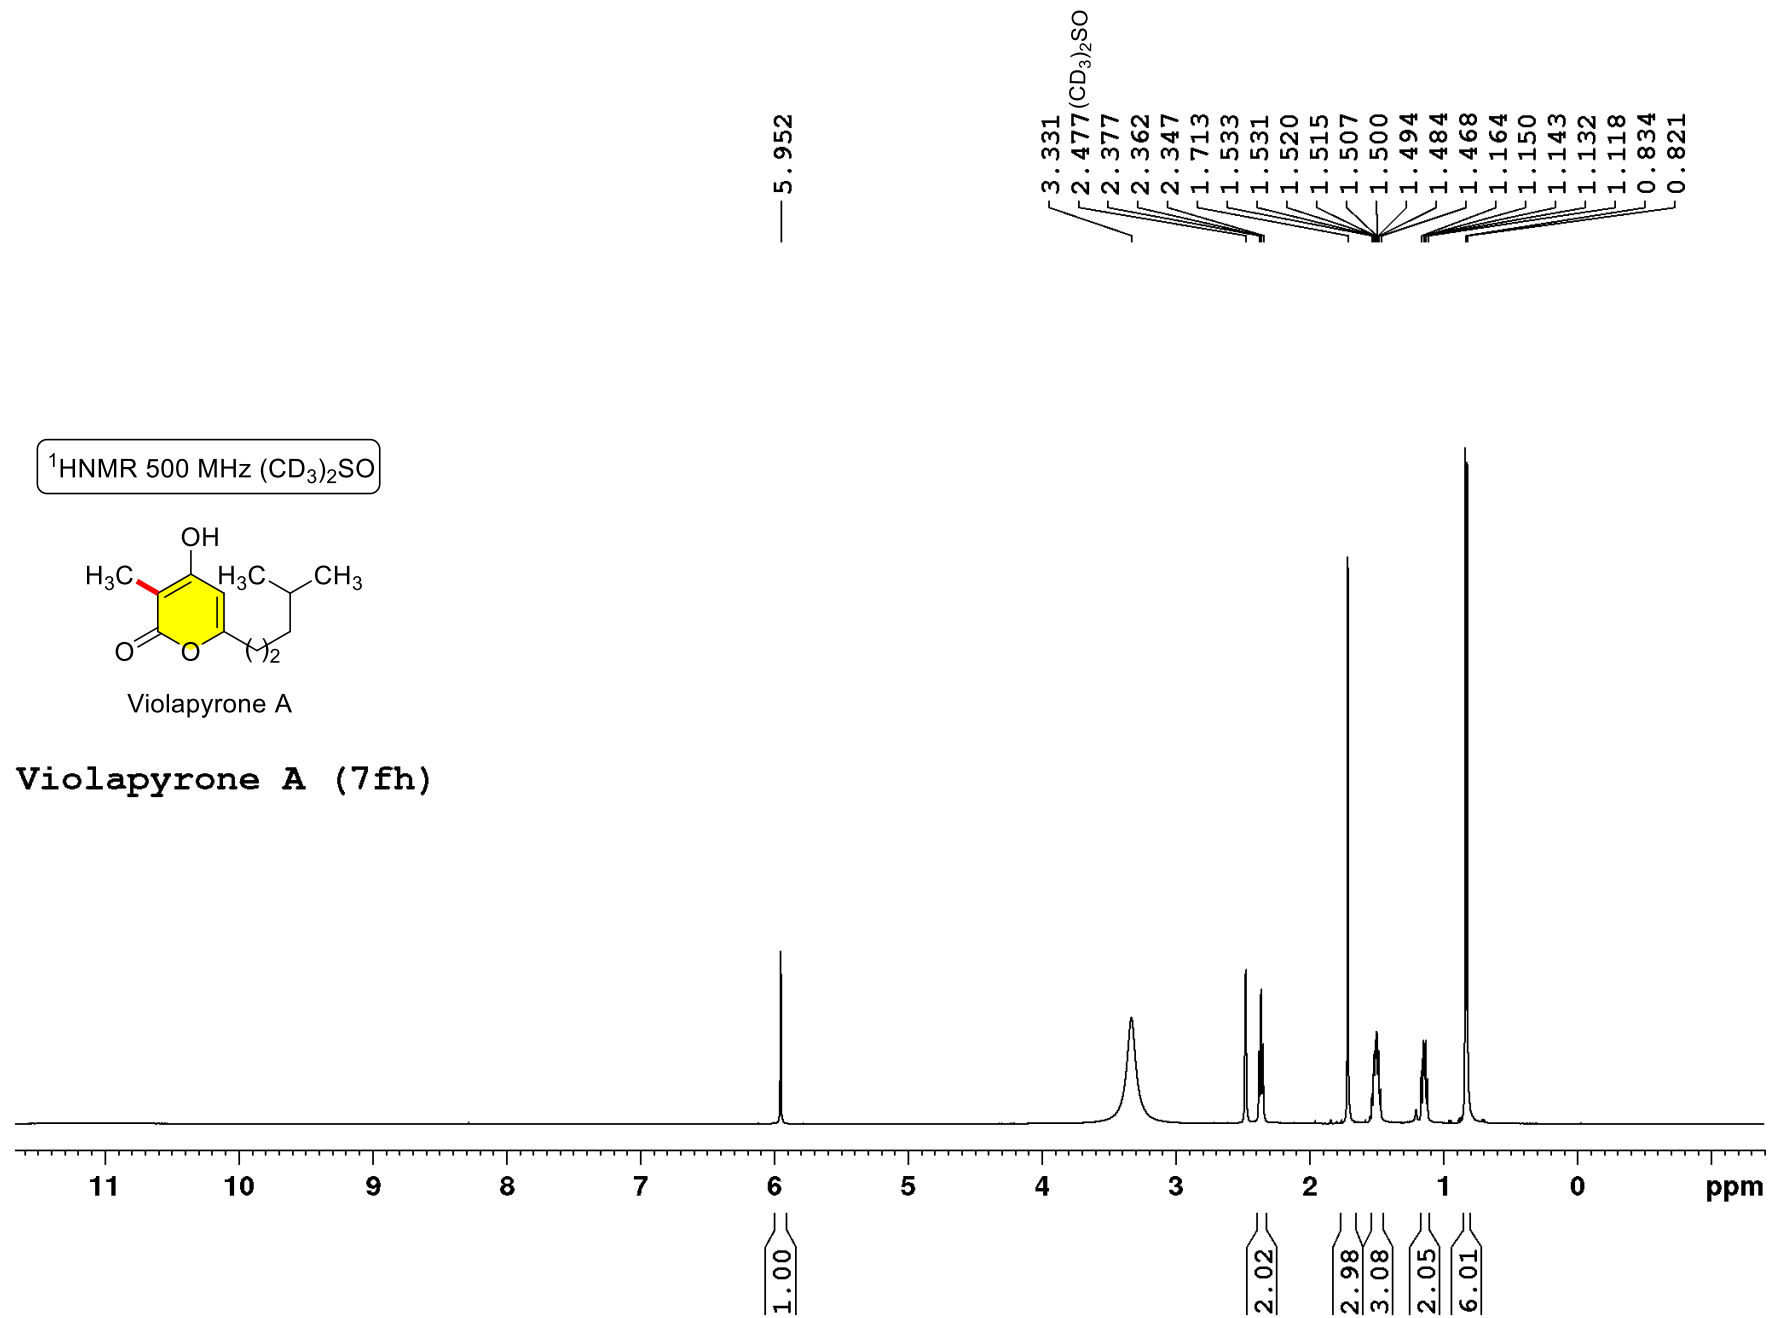



13C {1H} NMR 500 MHz (CD3)2SO

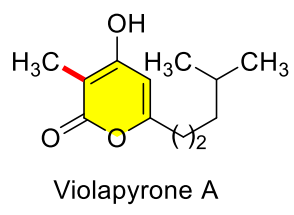

Violapyrone A (7fh)

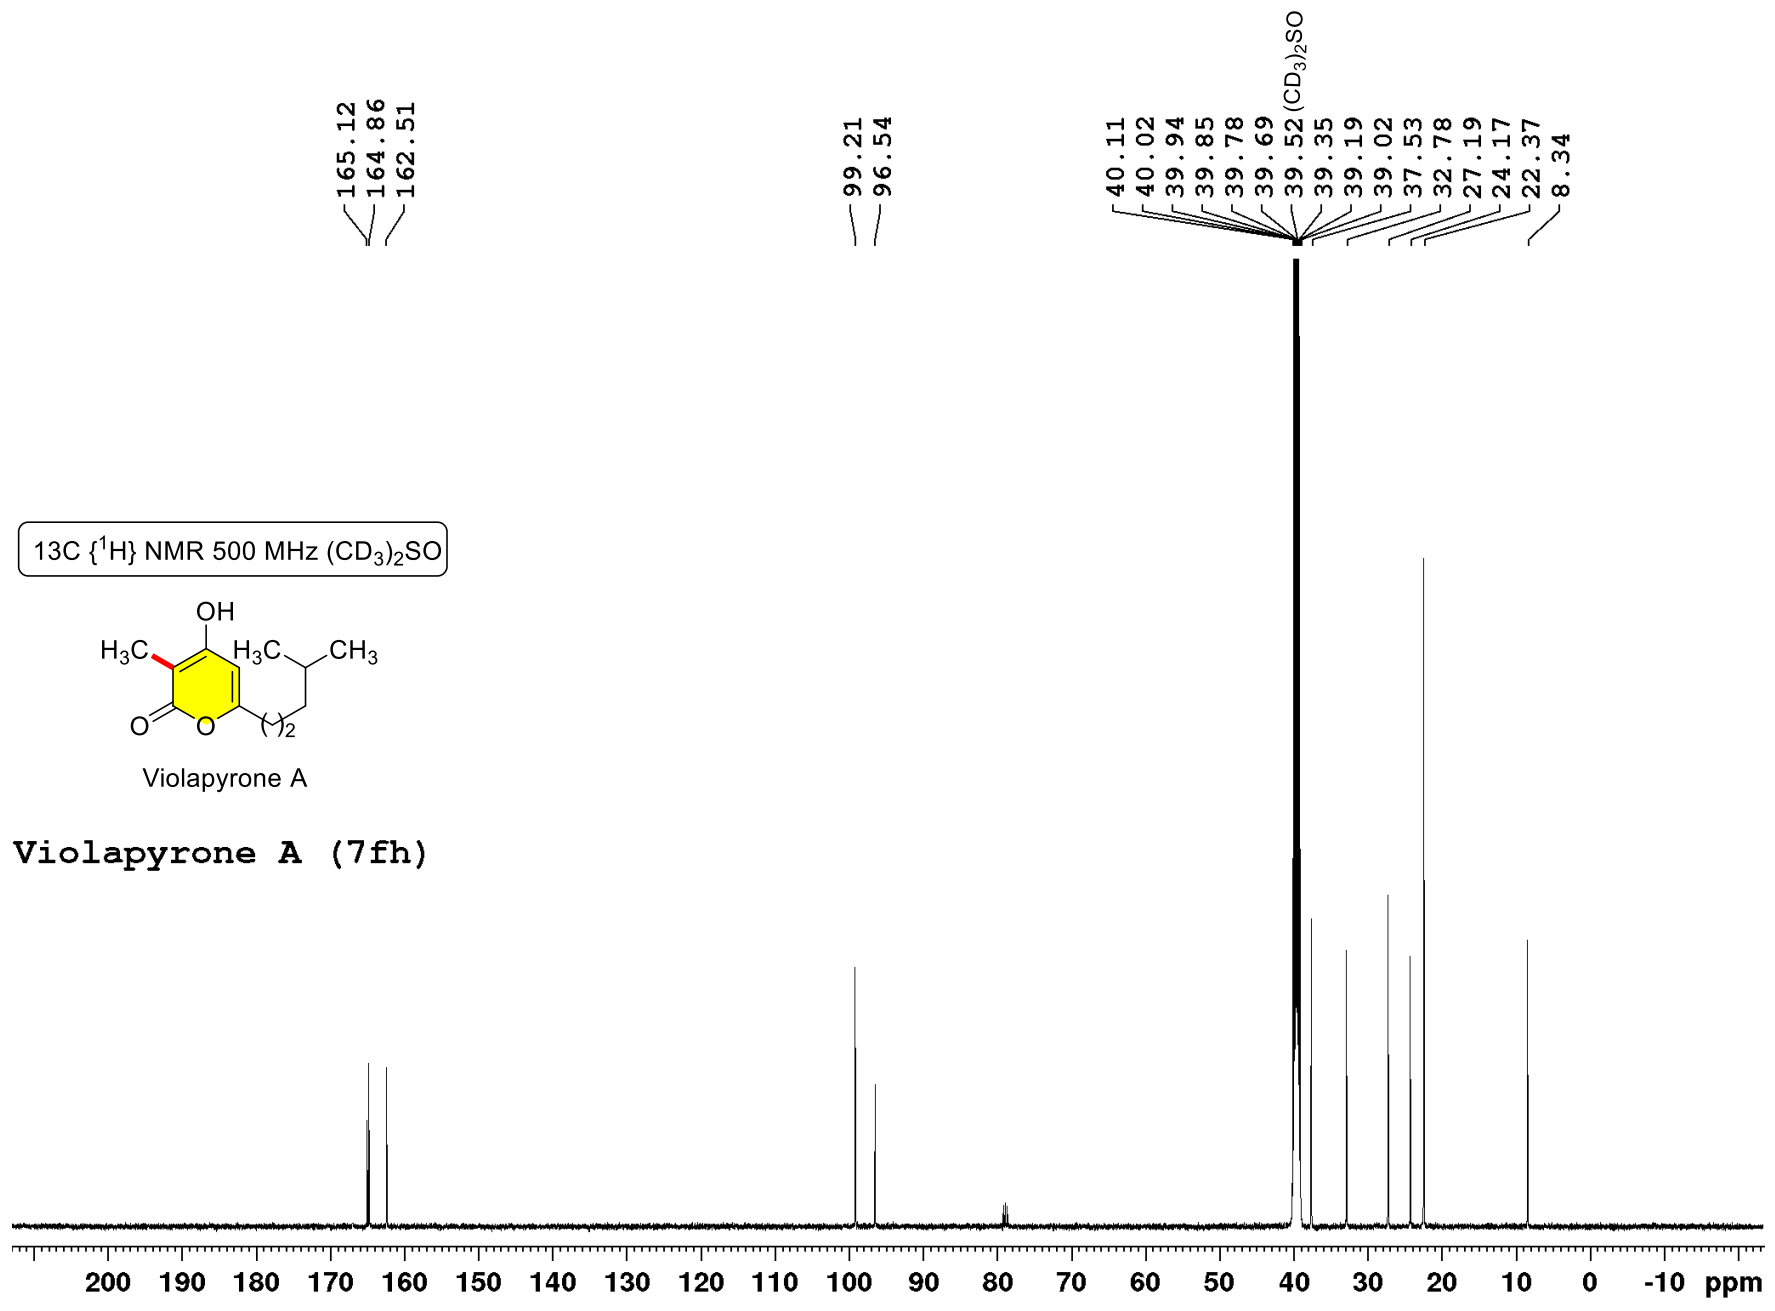

<sup>1</sup>HNMR 500 MHz CD<sub>3</sub>OD

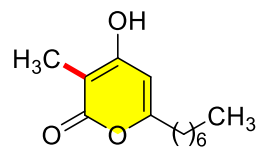

Violapyrone I

### Violapyrone I (7gh)

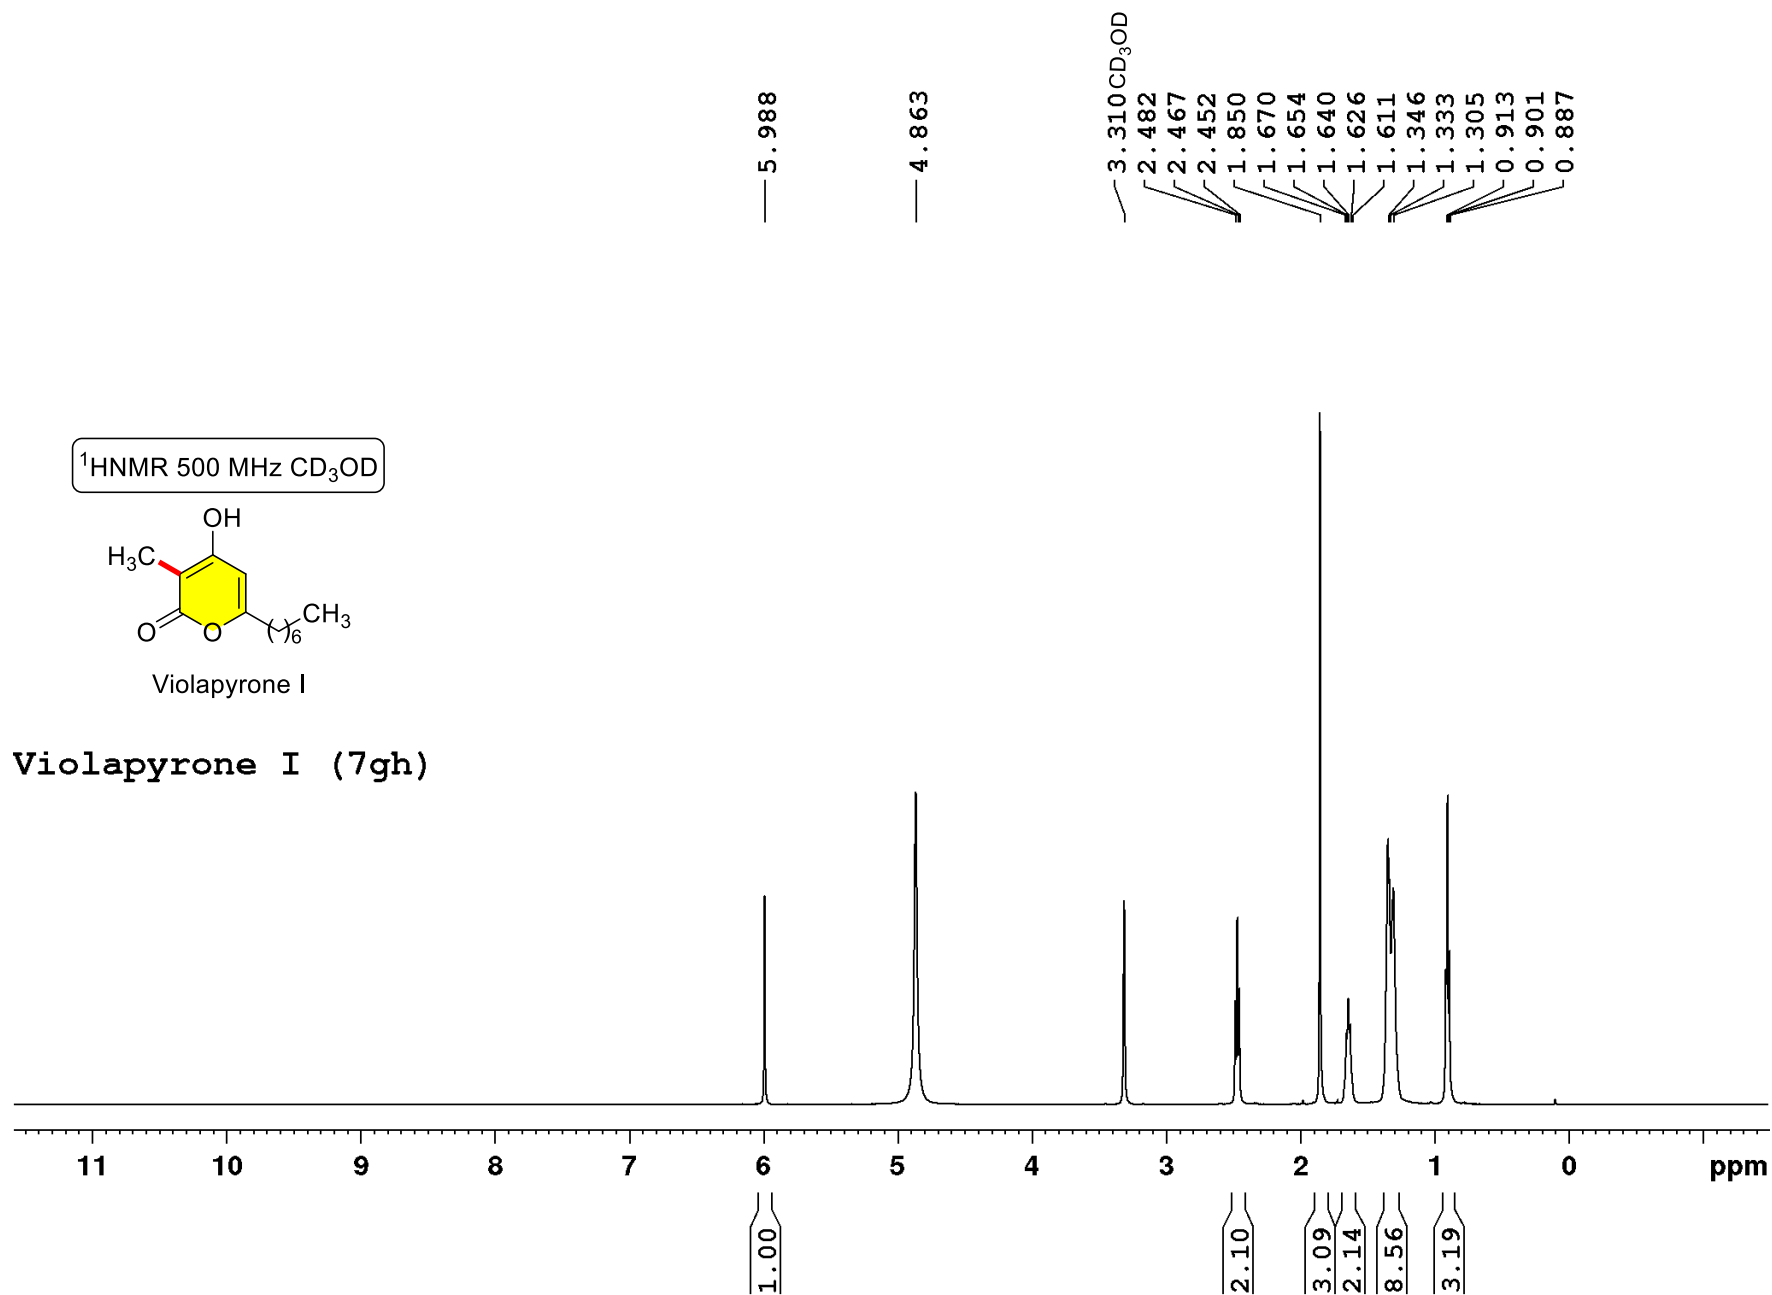

13C {1H} NMR 400 MHz CD<sub>3</sub>OD

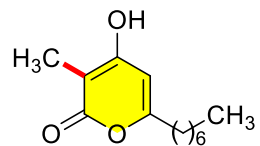

Violapyrone I

Violapyrone I (7gh)

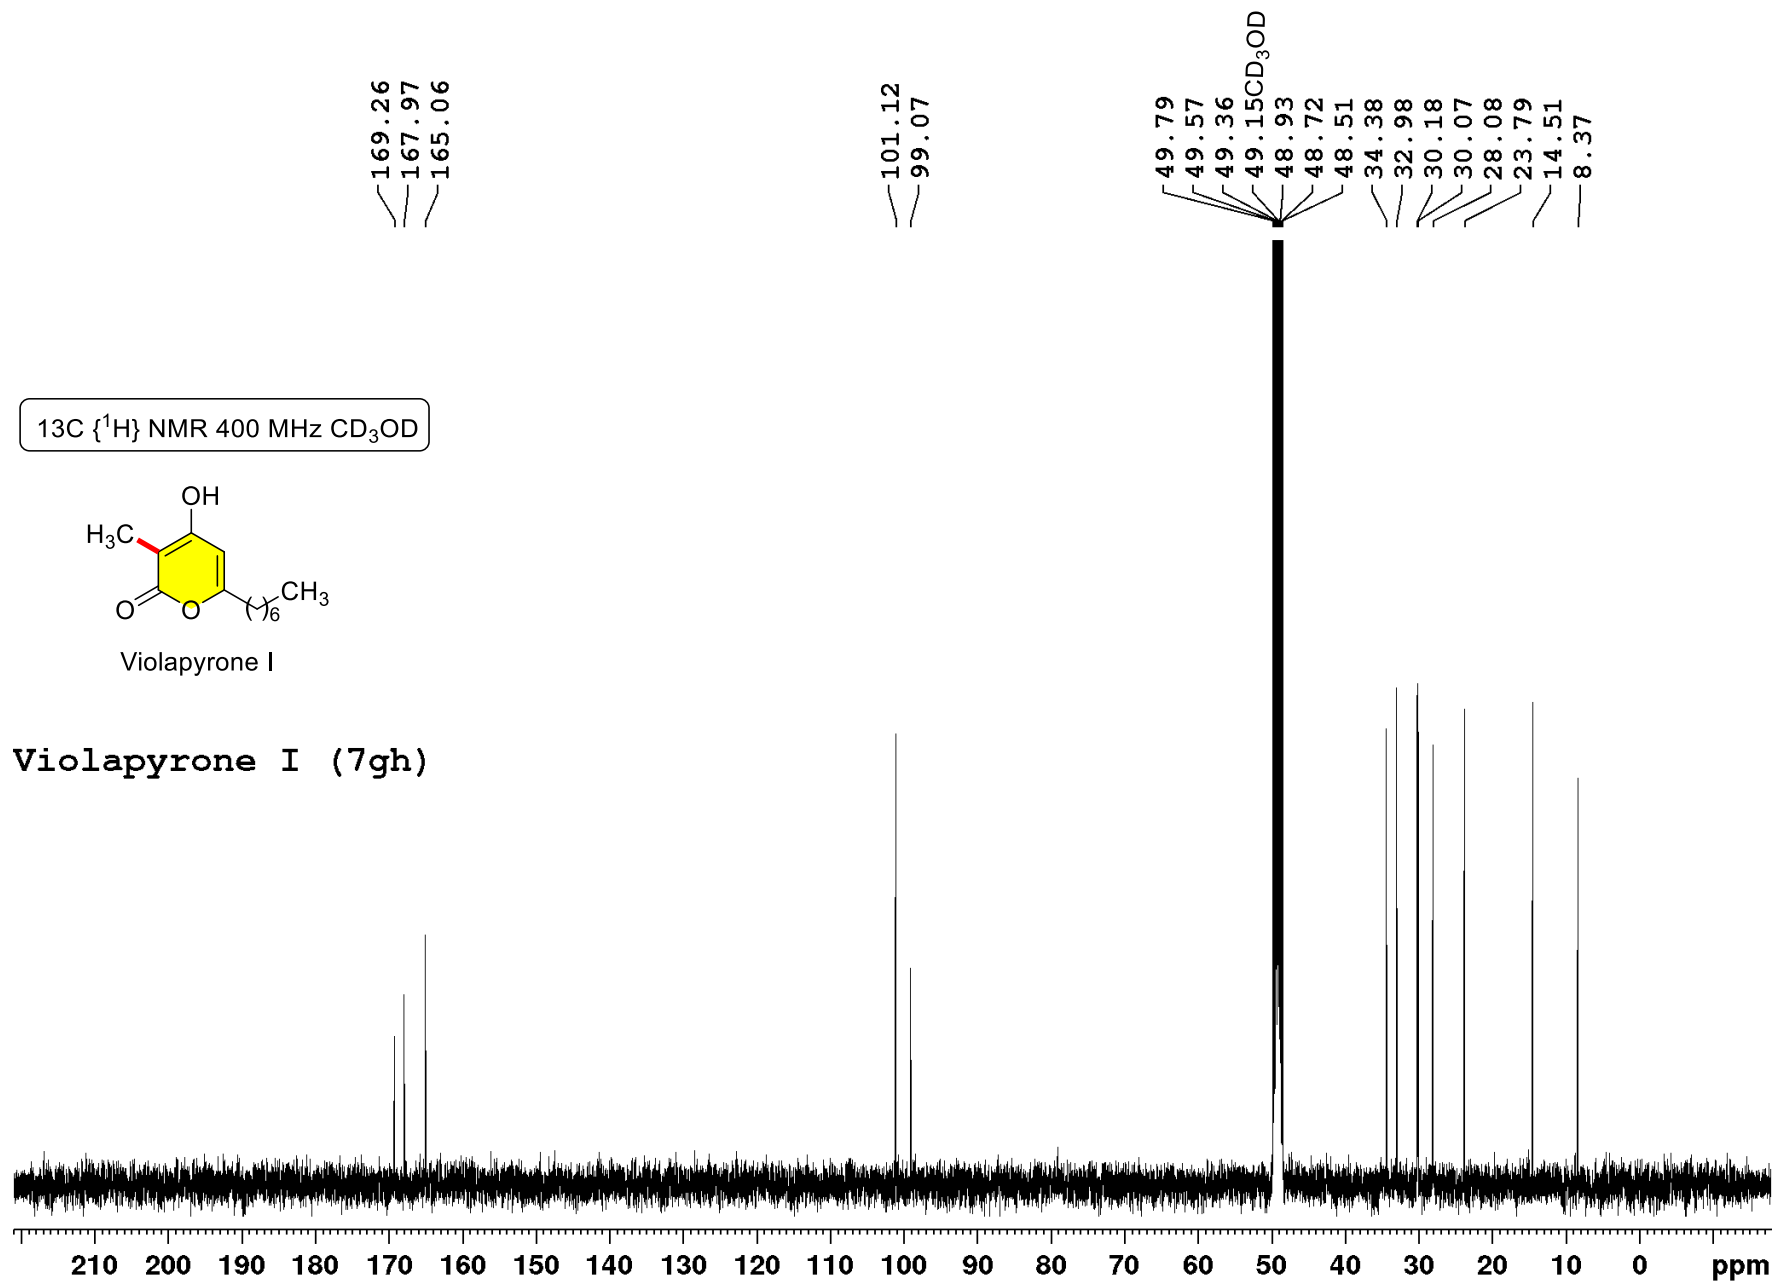

<sup>1</sup>HNMR 500 MHz (CD<sub>3</sub>)<sub>2</sub>SO

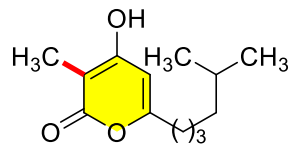

Violapyrone B

### Violapyrone B (7hh)

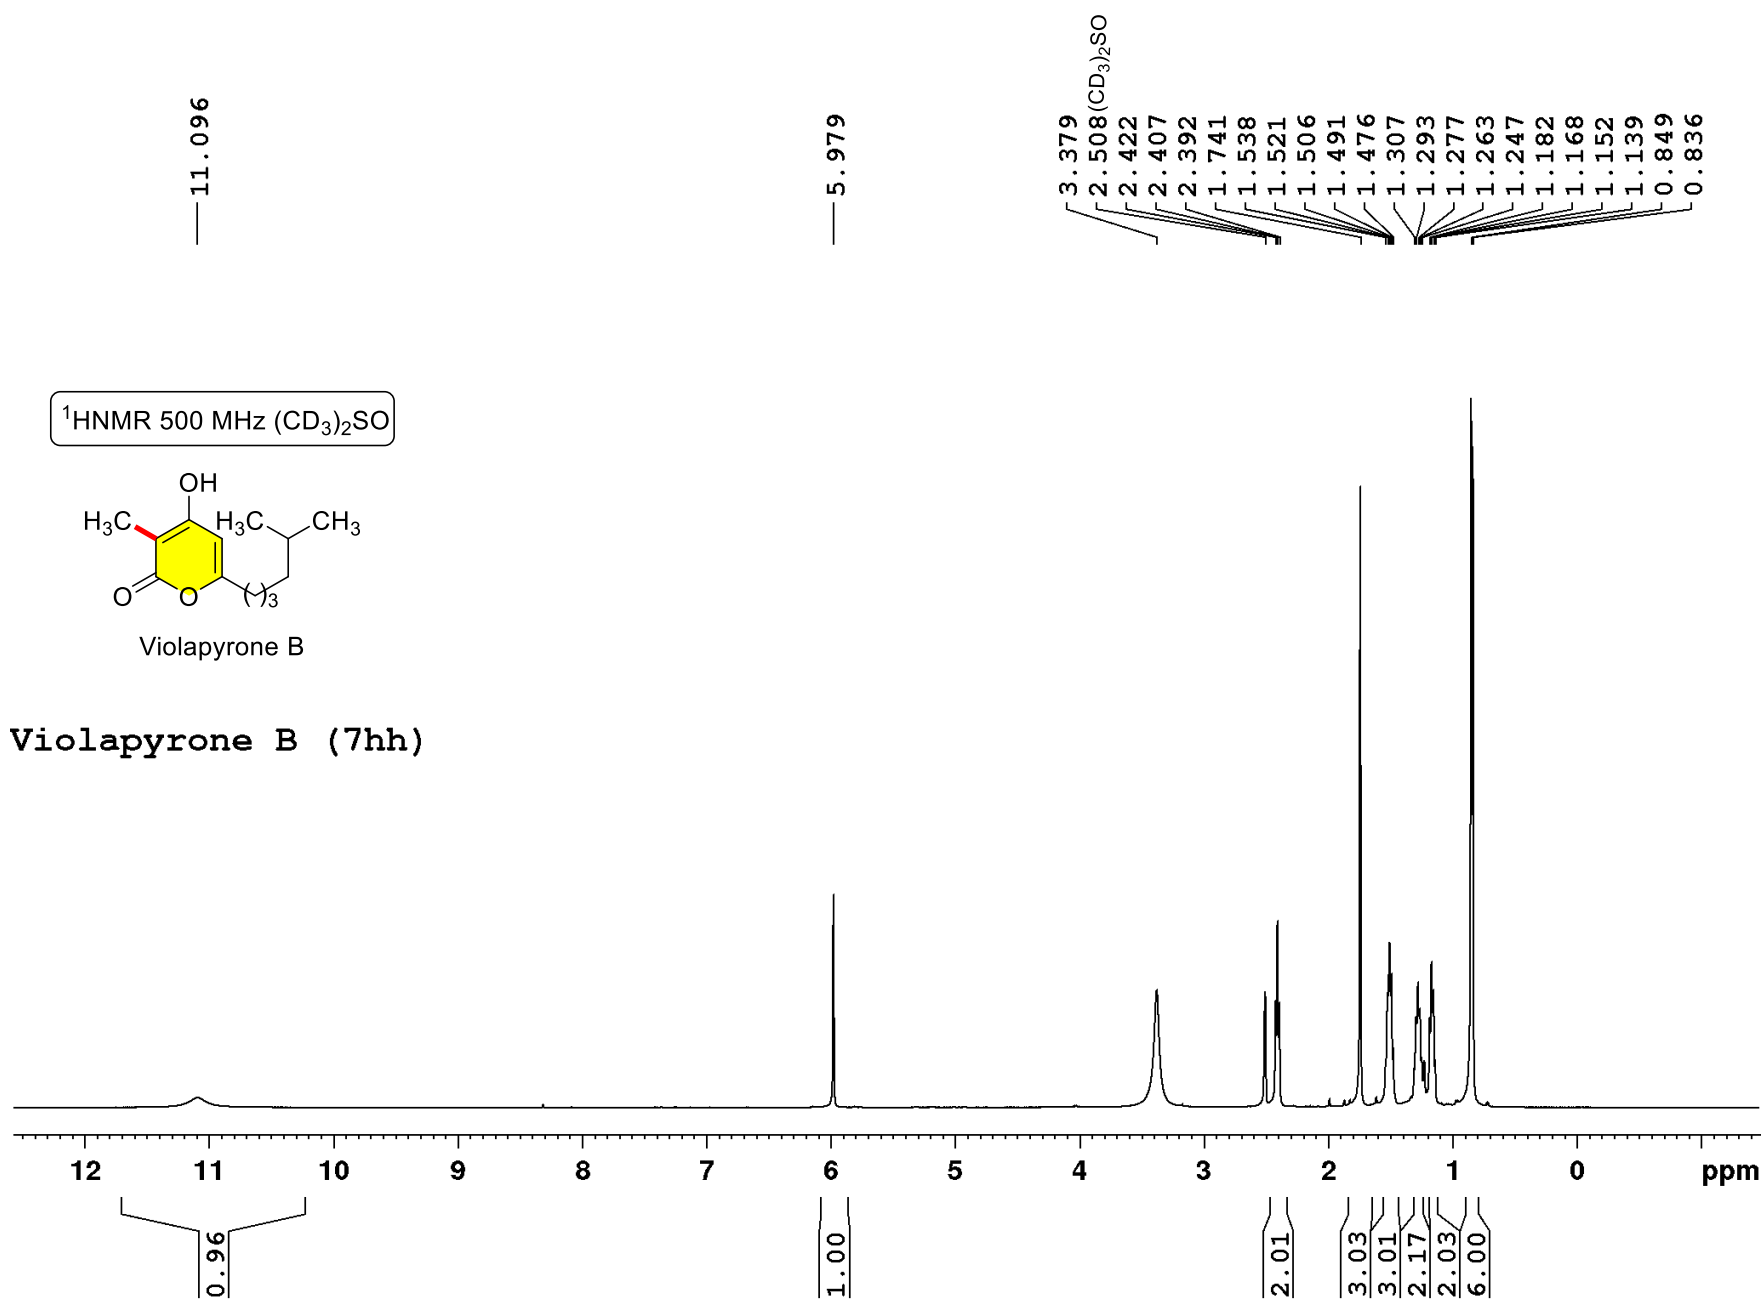

13C {1H} NMR 500MHz (CD3)2SO

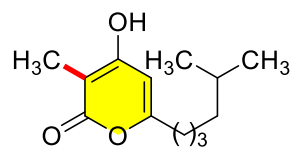

Violapyrone B

Violapyrone B (7hh)

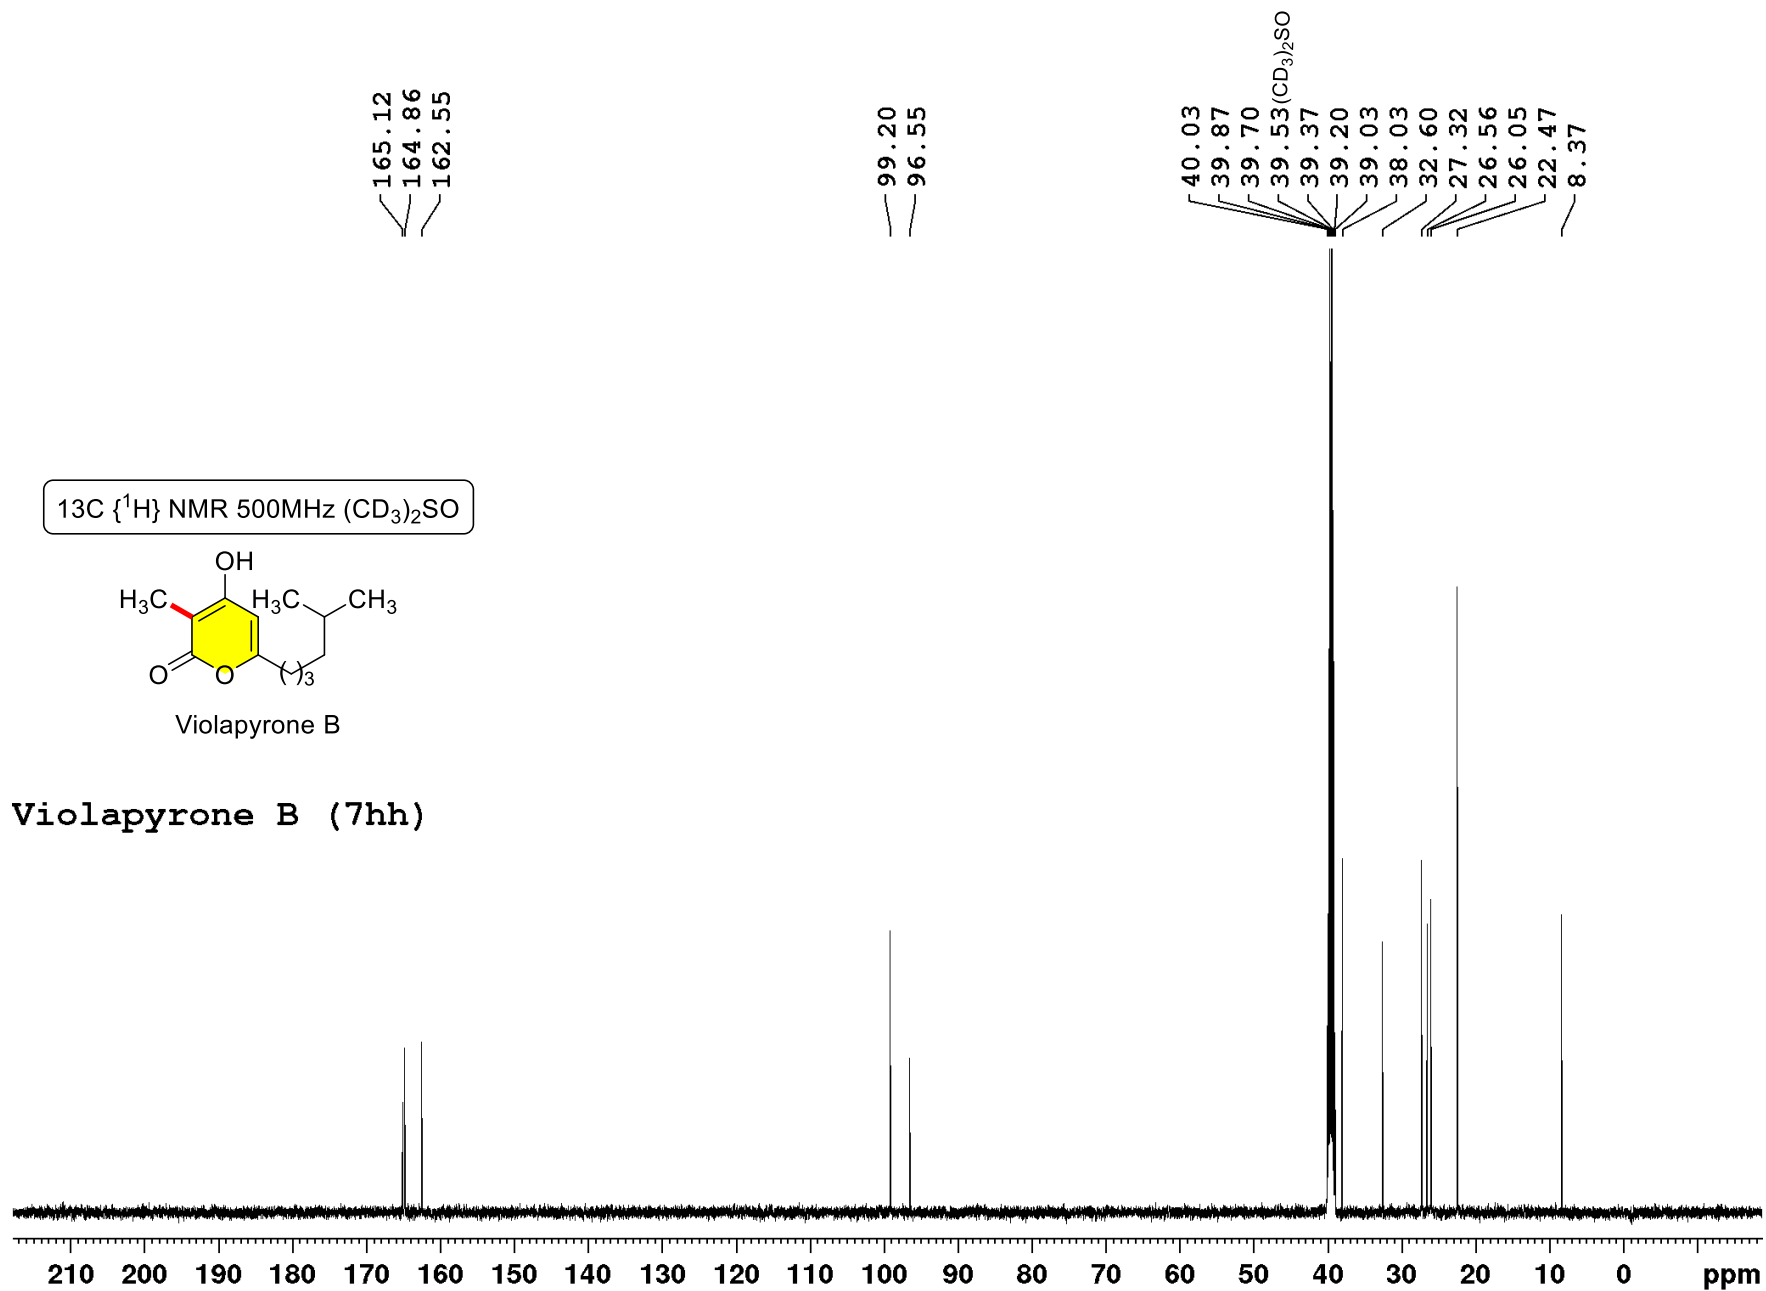

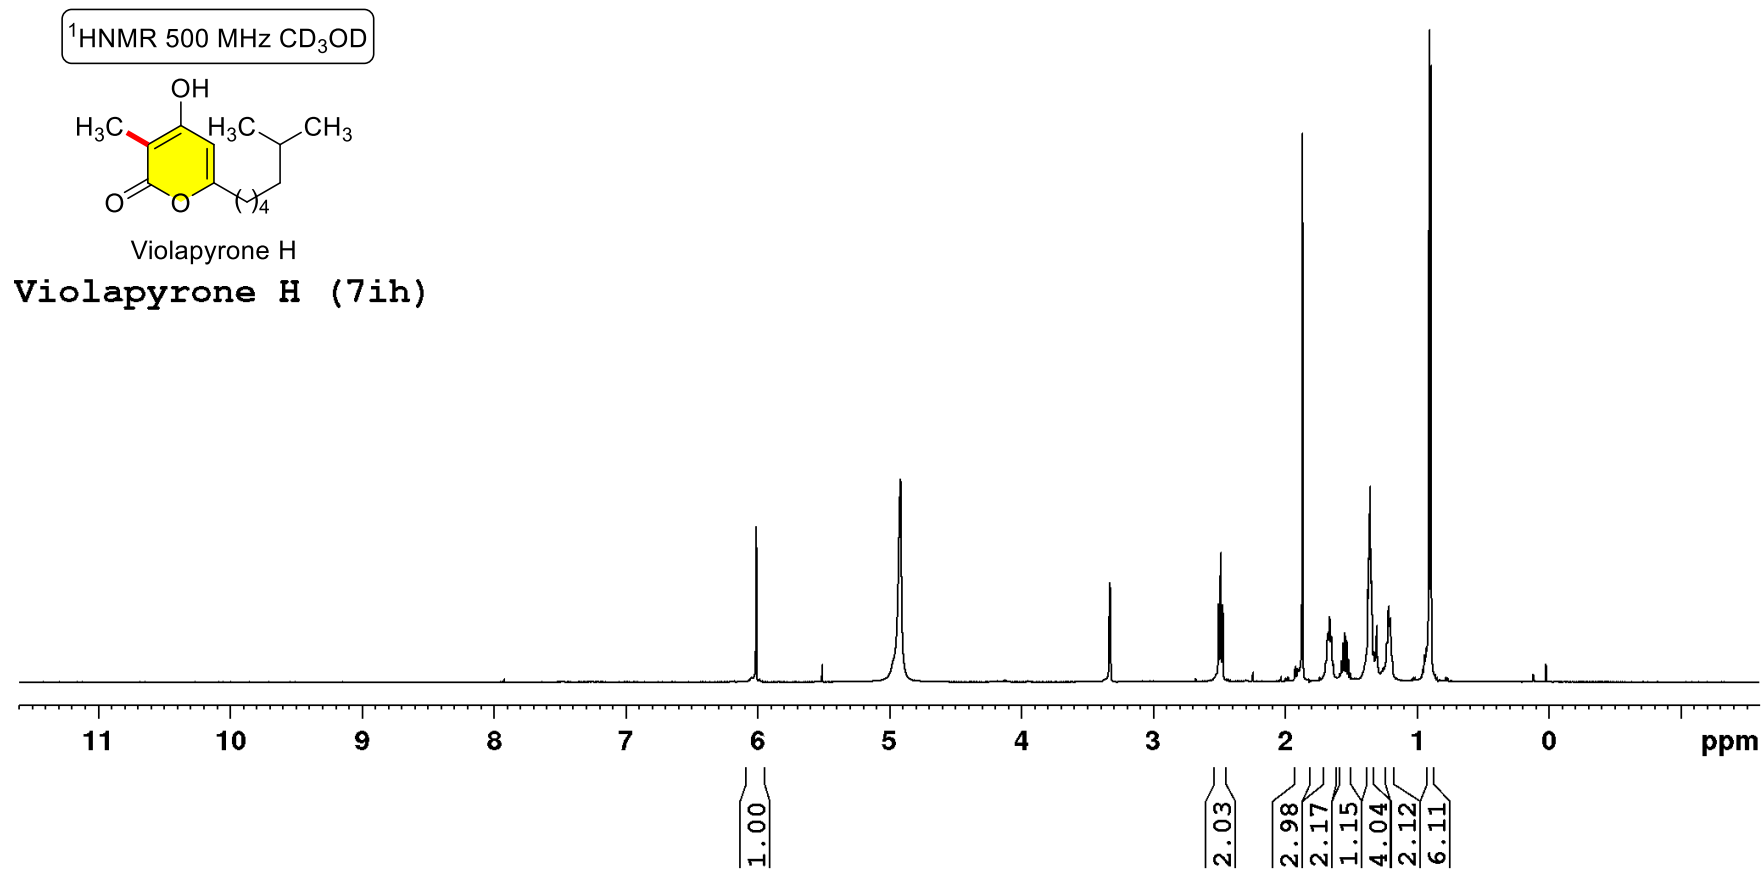

13C {1H} NMR 500 MHz CD3OD

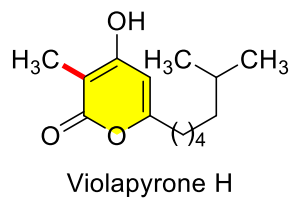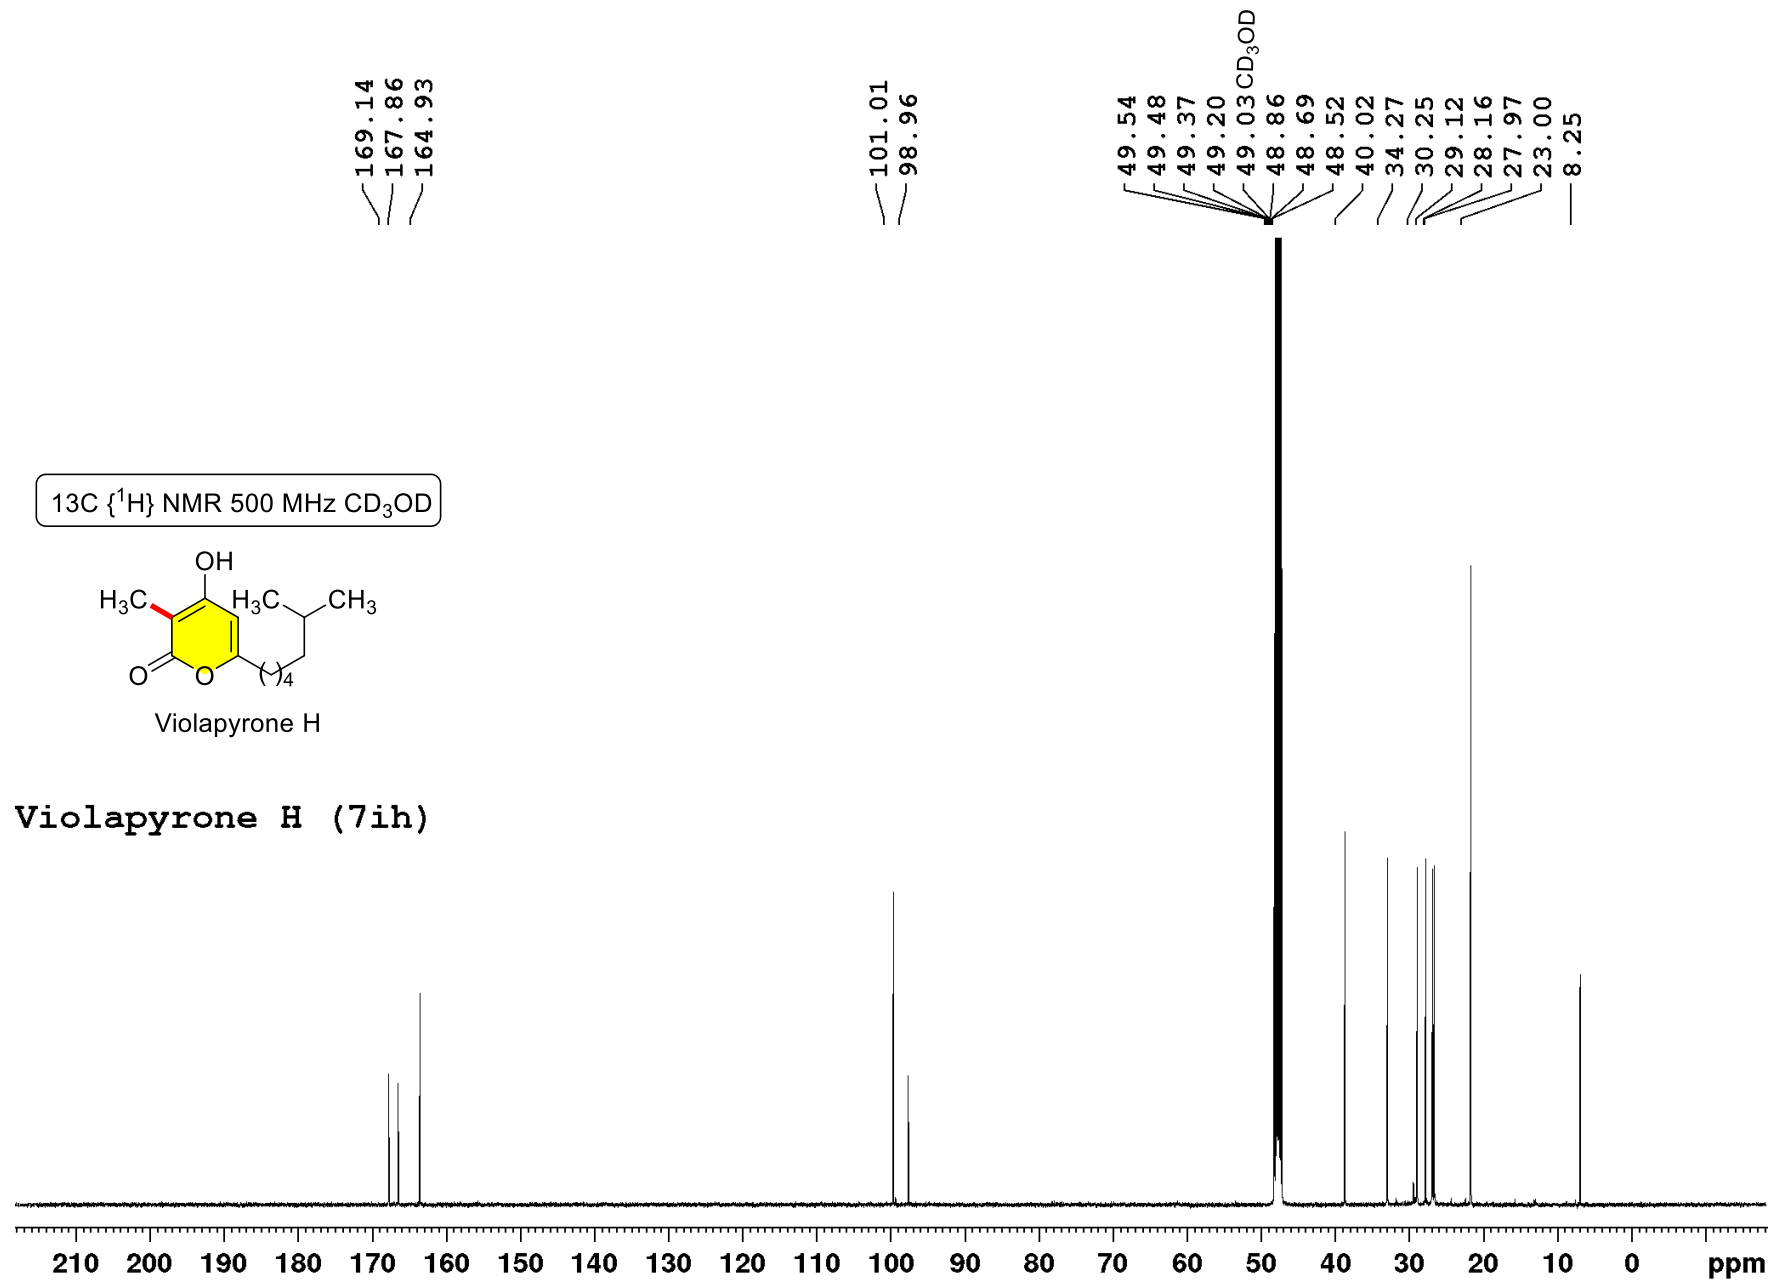

Violapyrone H (7ih)

6.011  
 4.883  
 3.335  
 3.332  
 3.329 CD<sub>3</sub>OD  
 3.326  
 3.322  
 2.507  
 2.492  
 2.477  
 1.870  
 1.678  
 1.670  
 1.665  
 1.661  
 1.651  
 1.637  
 1.626  
 1.623  
 1.618  
 1.611  
 1.427  
 1.421  
 1.417  
 1.409  
 1.402  
 1.390  
 1.384  
 1.380  
 1.377  
 1.372  
 1.368  
 1.363  
 1.358  
 1.351  
 1.344  
 1.336  
 1.334  
 1.322  
 1.309  
 1.304  
 1.210  
 1.208  
 1.196  
 1.193  
 1.179  
 1.173  
 1.166  
 1.164  
 1.159  
 1.153  
 1.139  
 1.138  
 0.908  
 0.893  
 0.889  
 0.878  
 0.876

<sup>1</sup>HNMR 500 MHz CD<sub>3</sub>OD

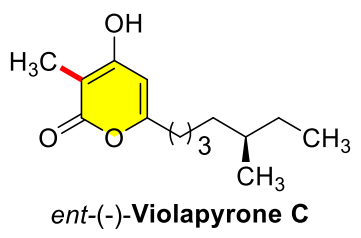

(-)-Violapyrone C (71h)

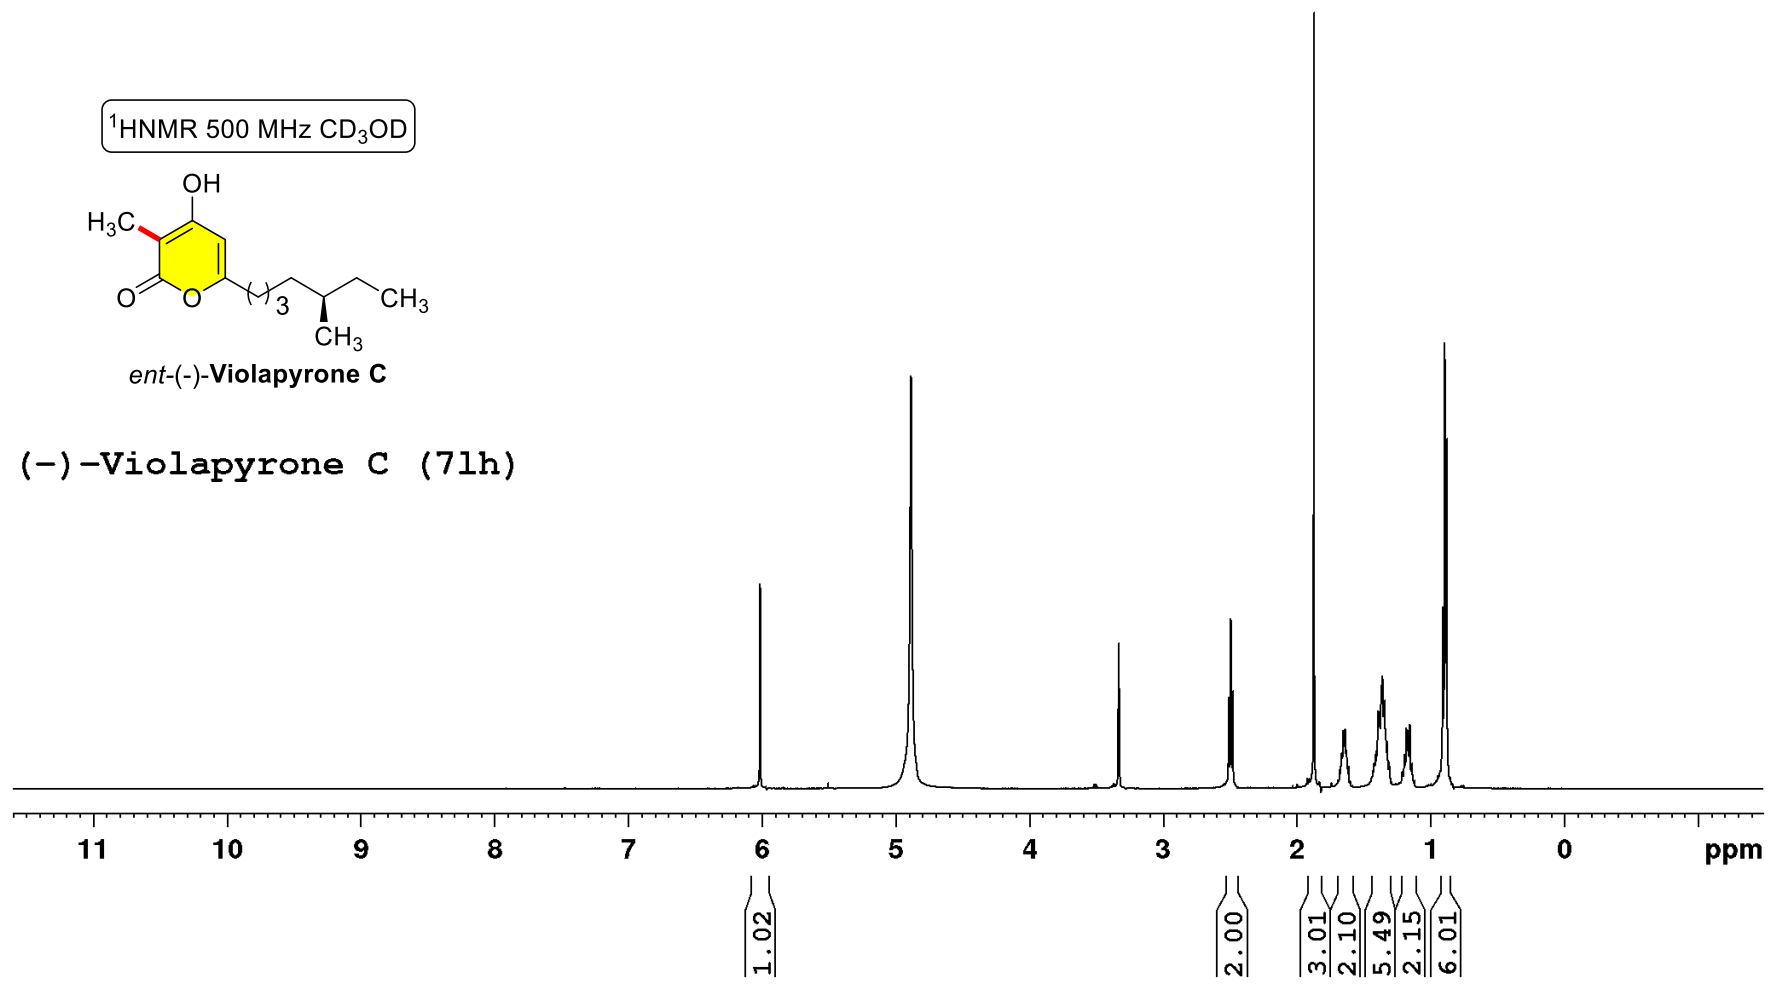



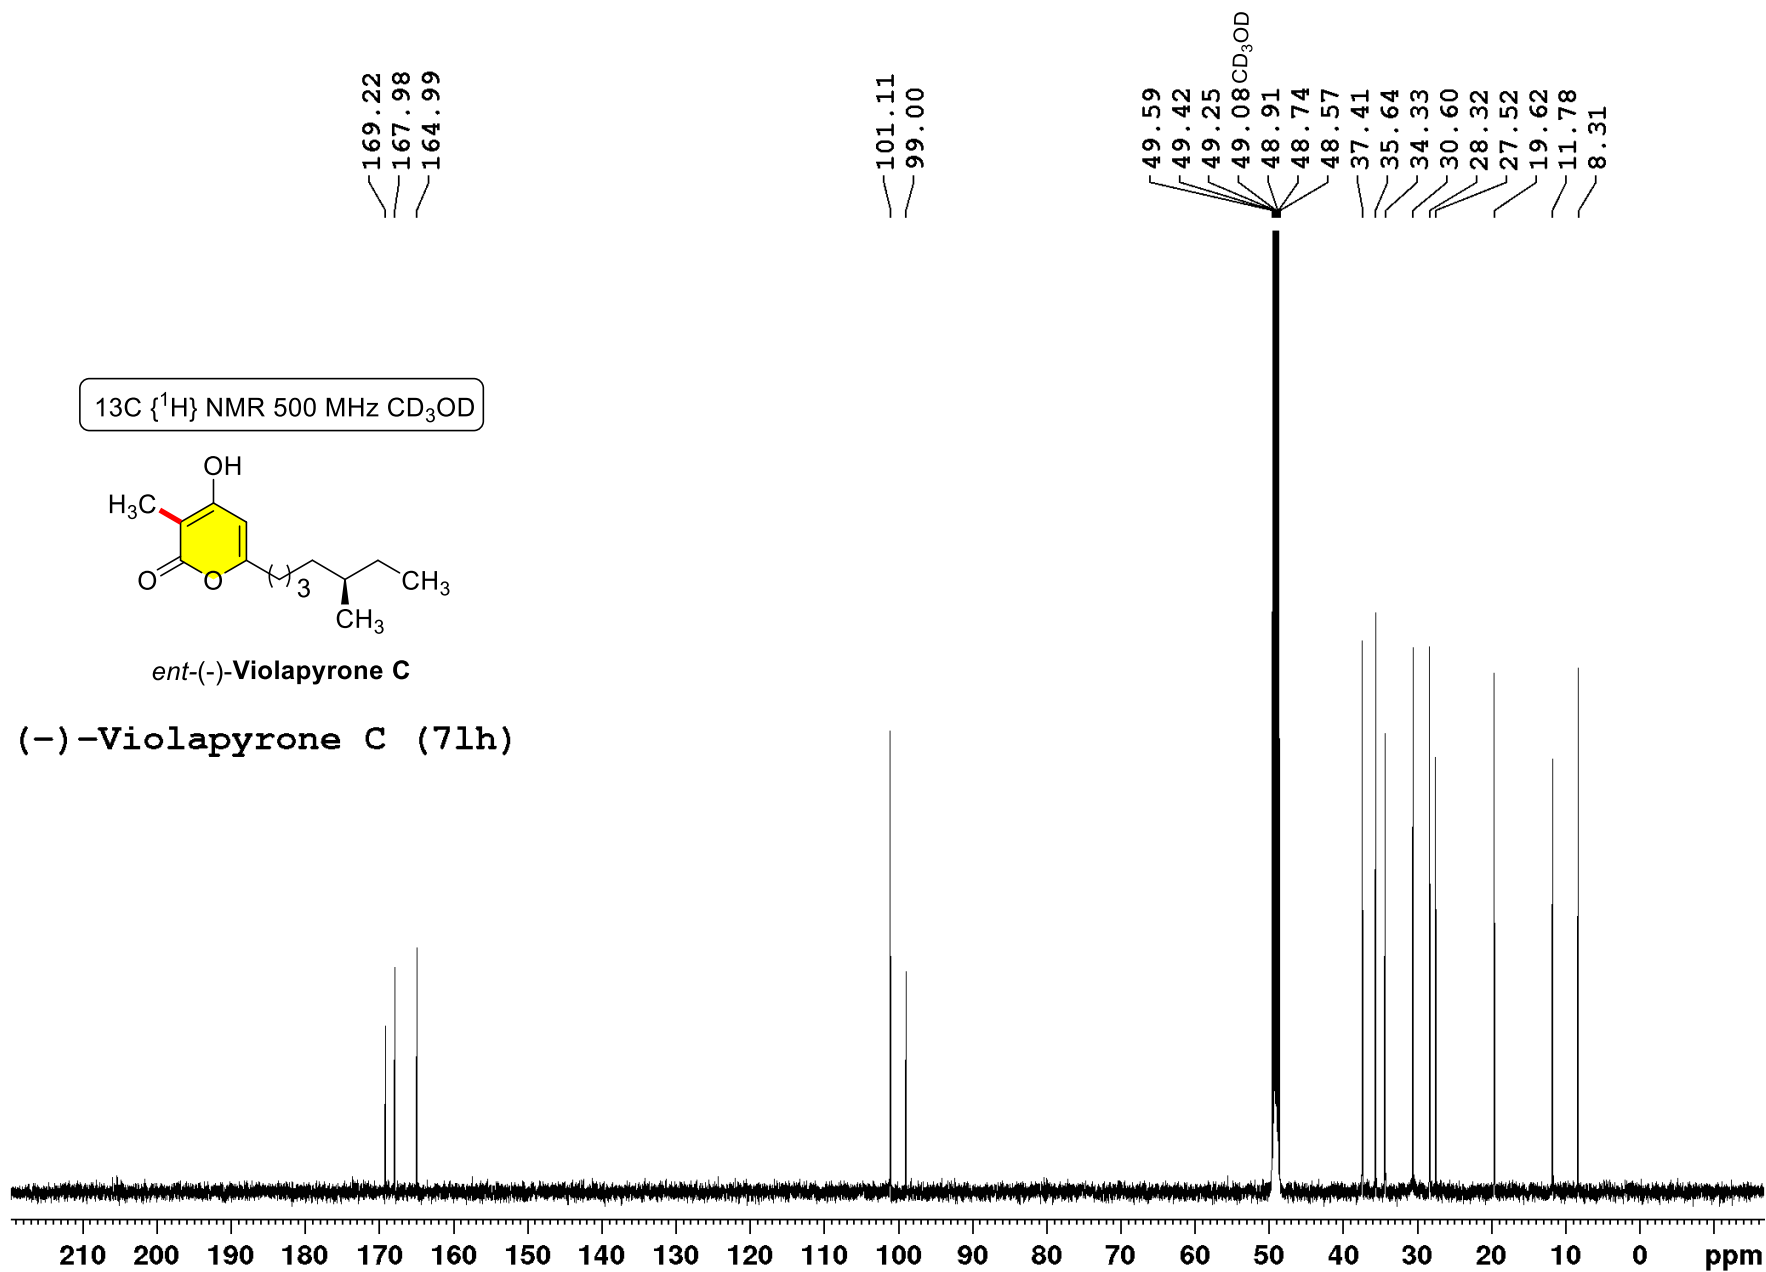

<sup>1</sup>H NMR 500 MHz CDCl<sub>3</sub>

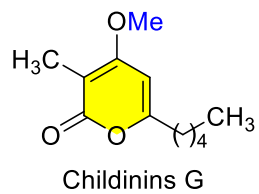

Product 11ch

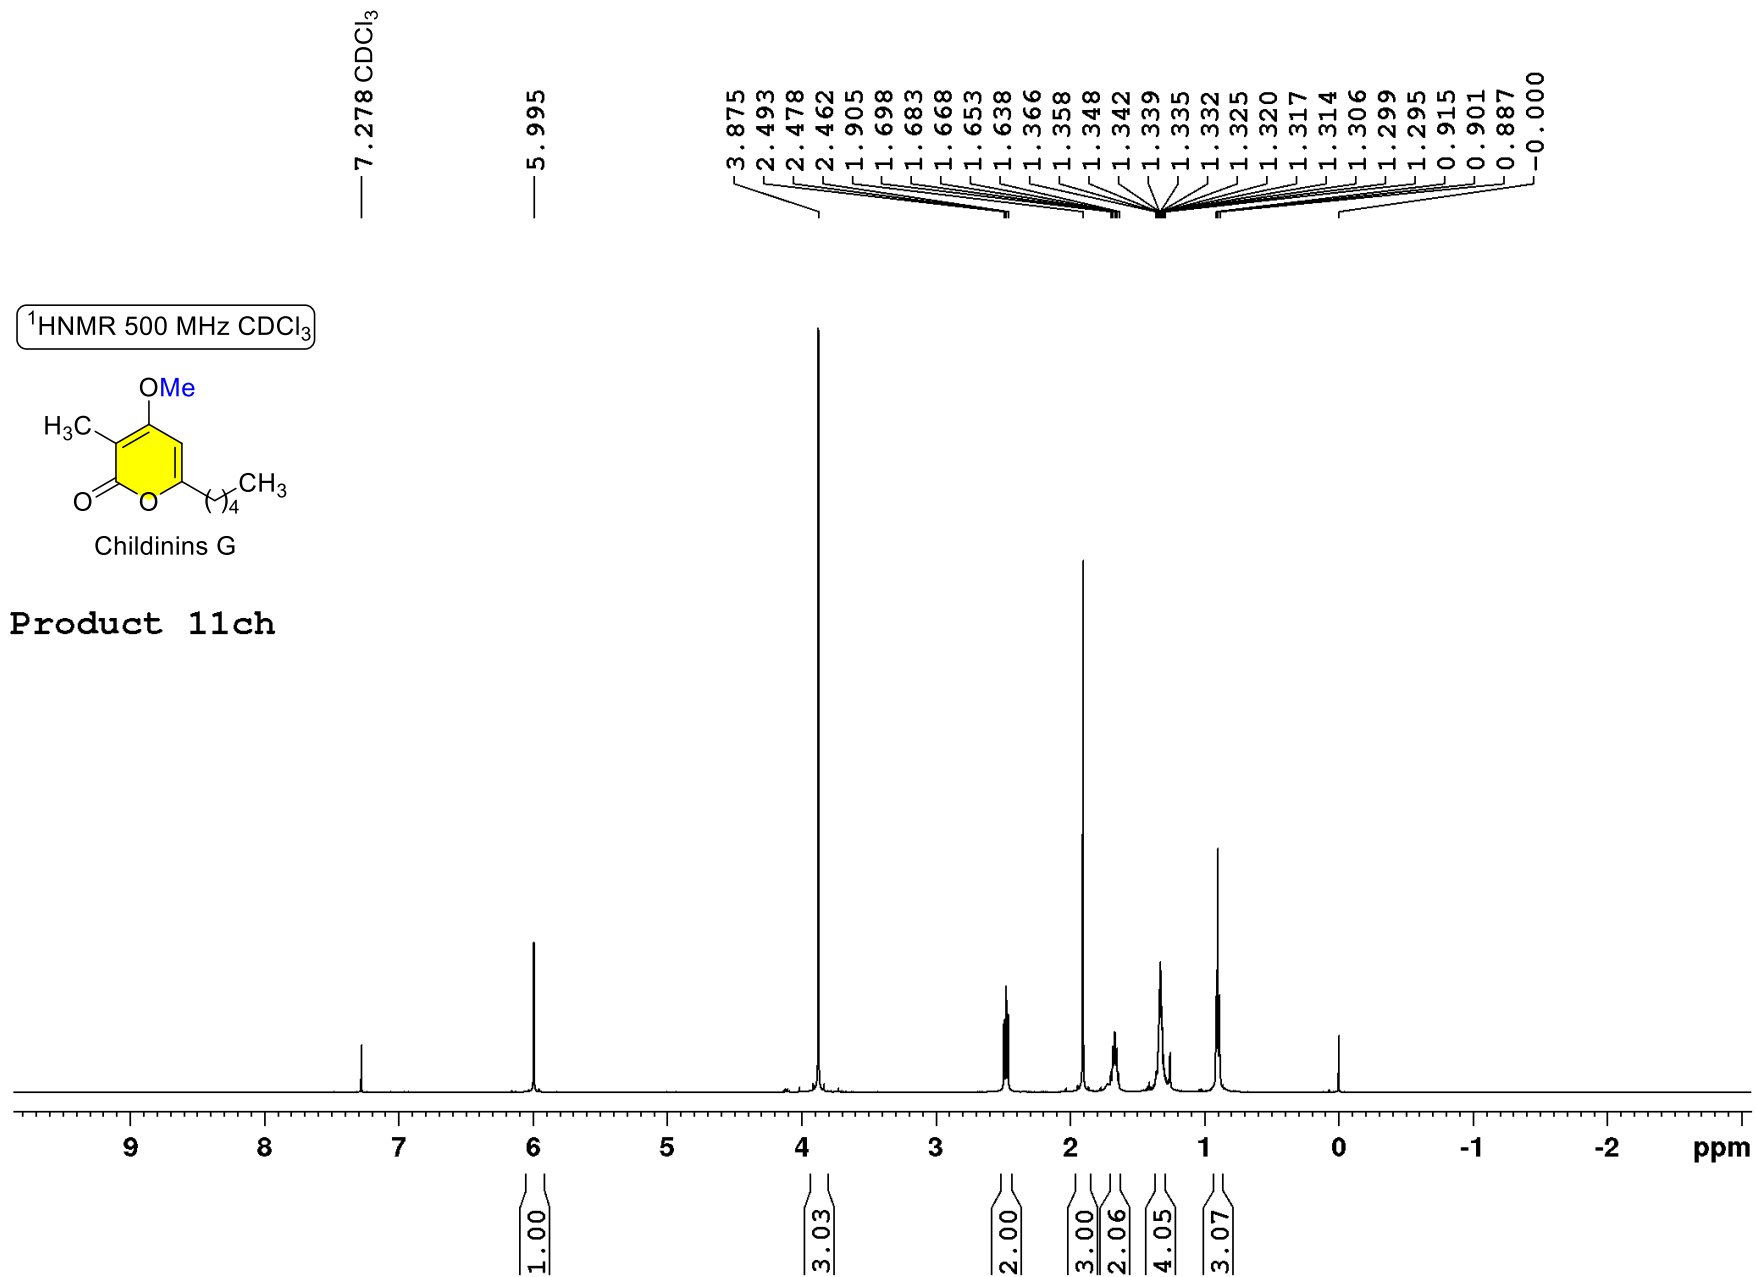

13C {1H} NMR 500 MHz CDCl3

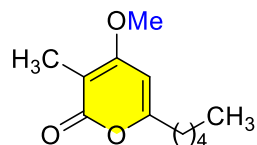

Childinins G

Product 11ch

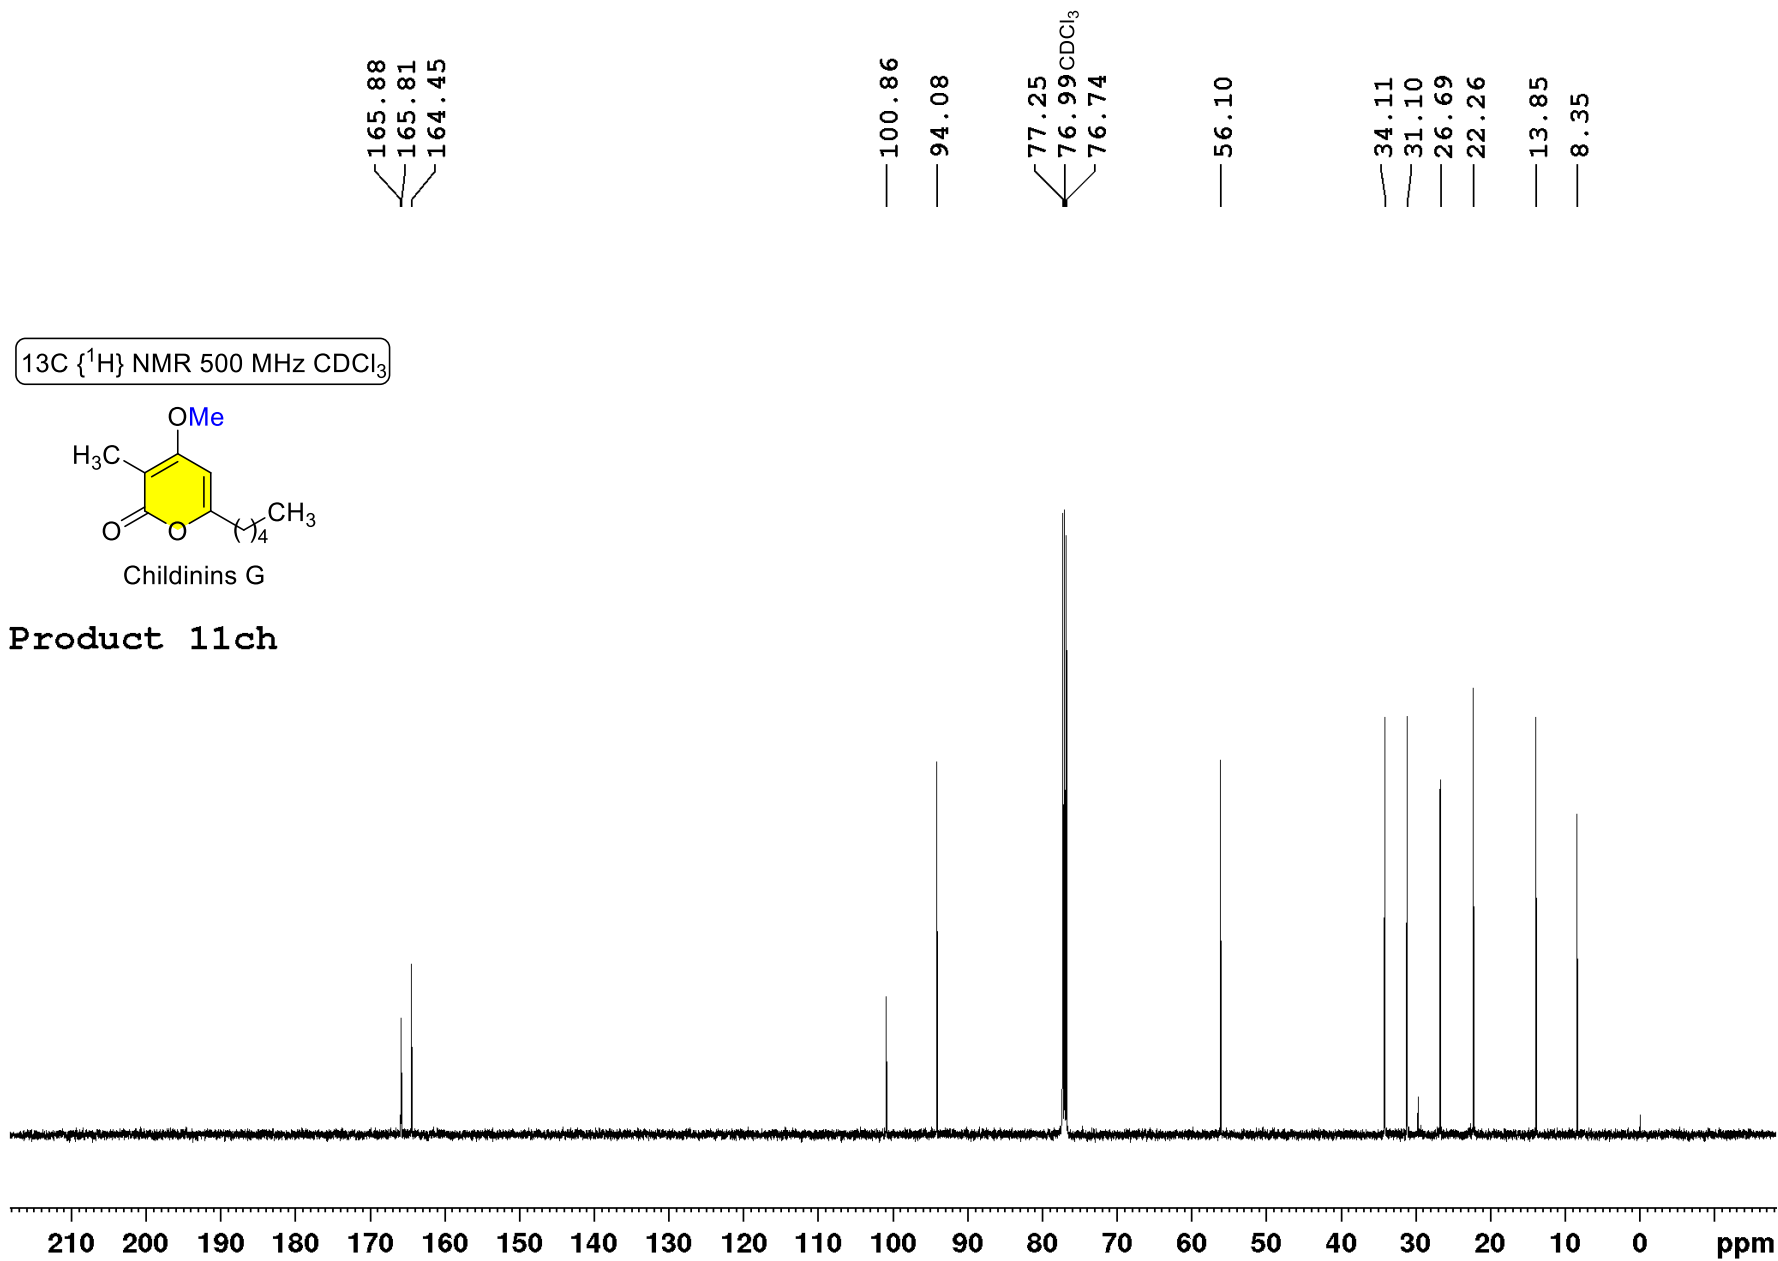

<sup>1</sup>HNMR 500 MHz (CD<sub>3</sub>)<sub>2</sub>SO

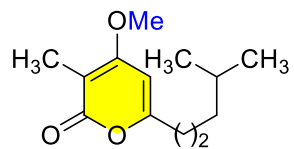

### Violapyrone Q (11fh)

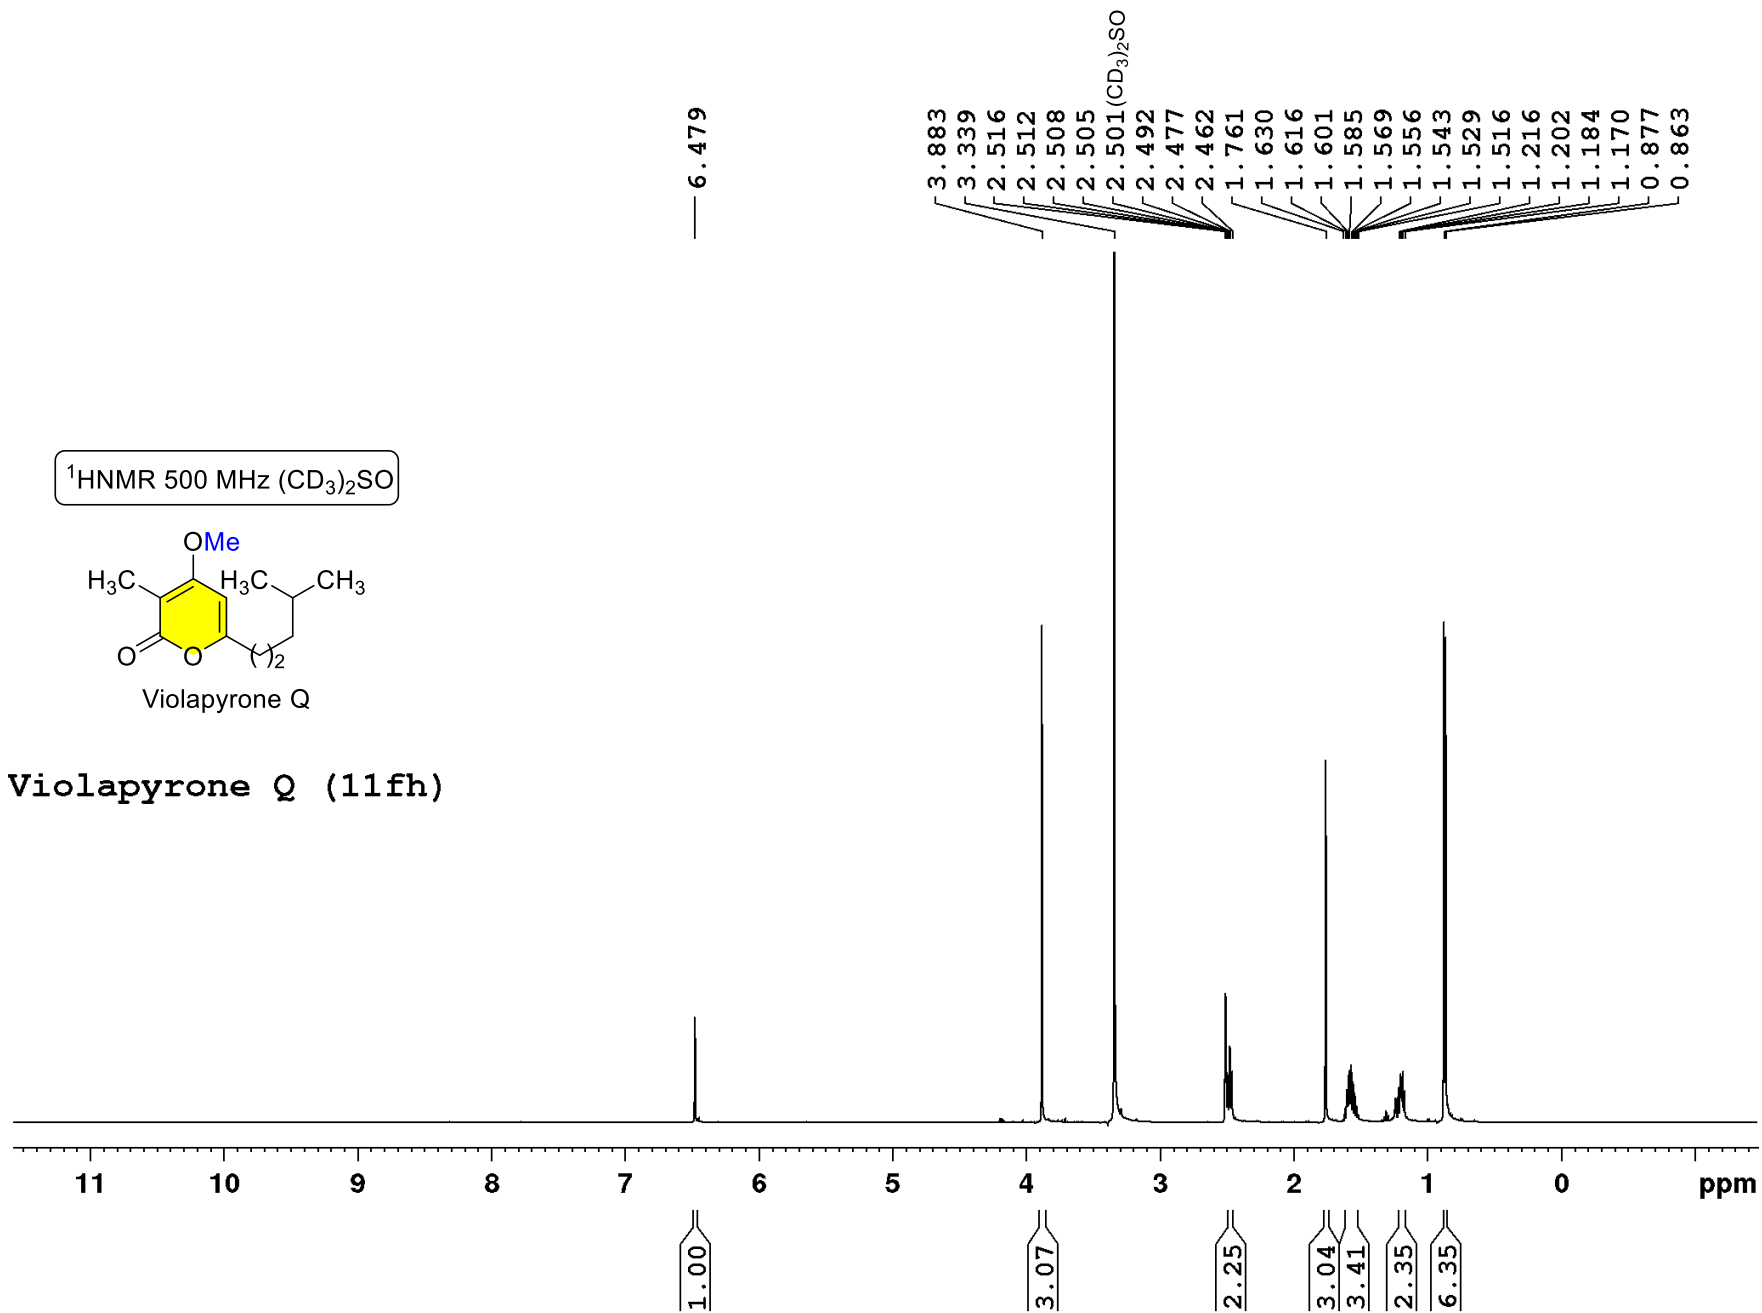

13C {1H} NMR 500 MHz (CD3)2SO

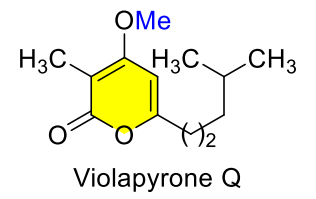

Violapyrone Q (11fh)

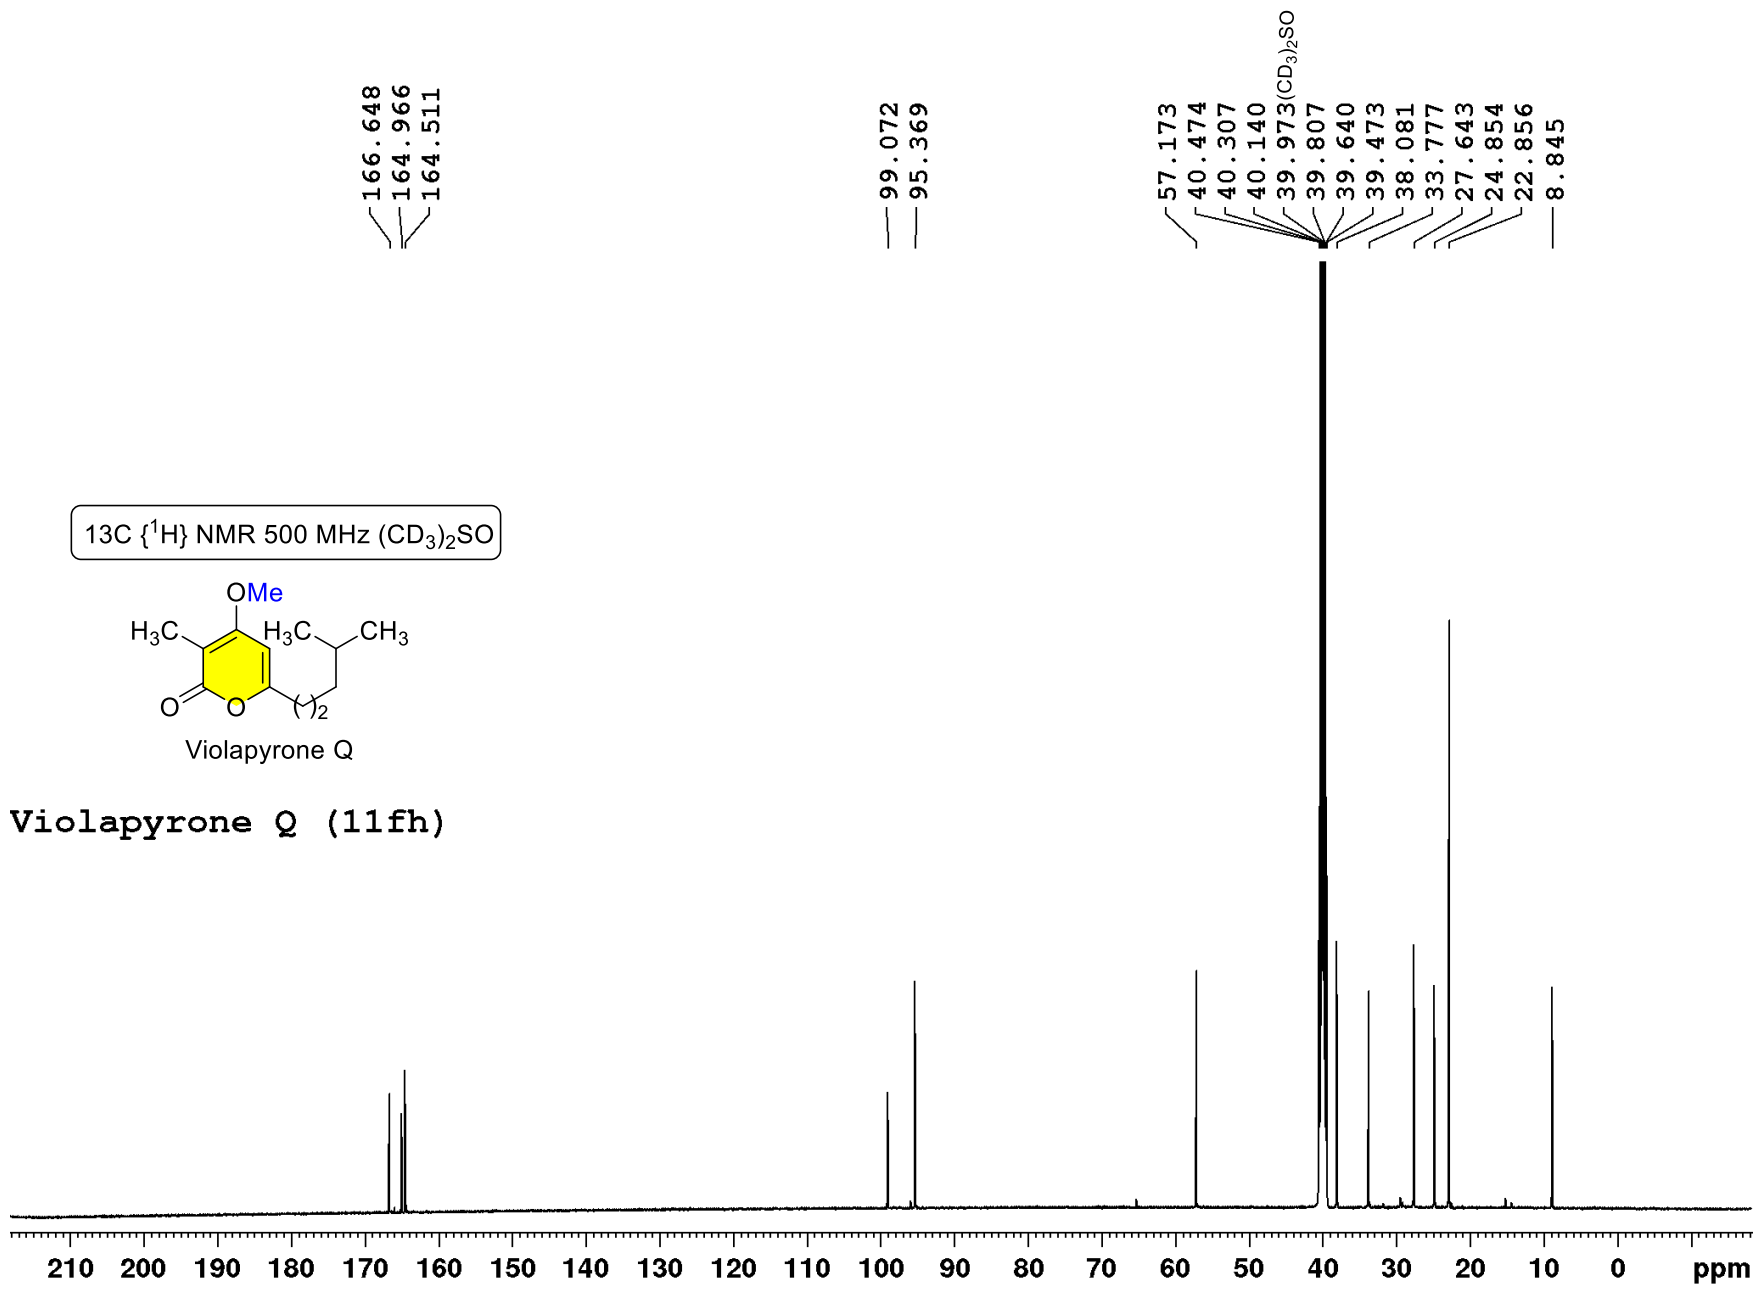

<sup>1</sup>HNMR 500 MHz (CD<sub>3</sub>)<sub>2</sub>SO

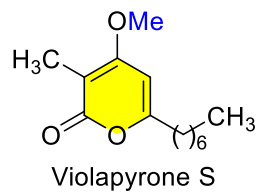

Violapyrone S (11gh)

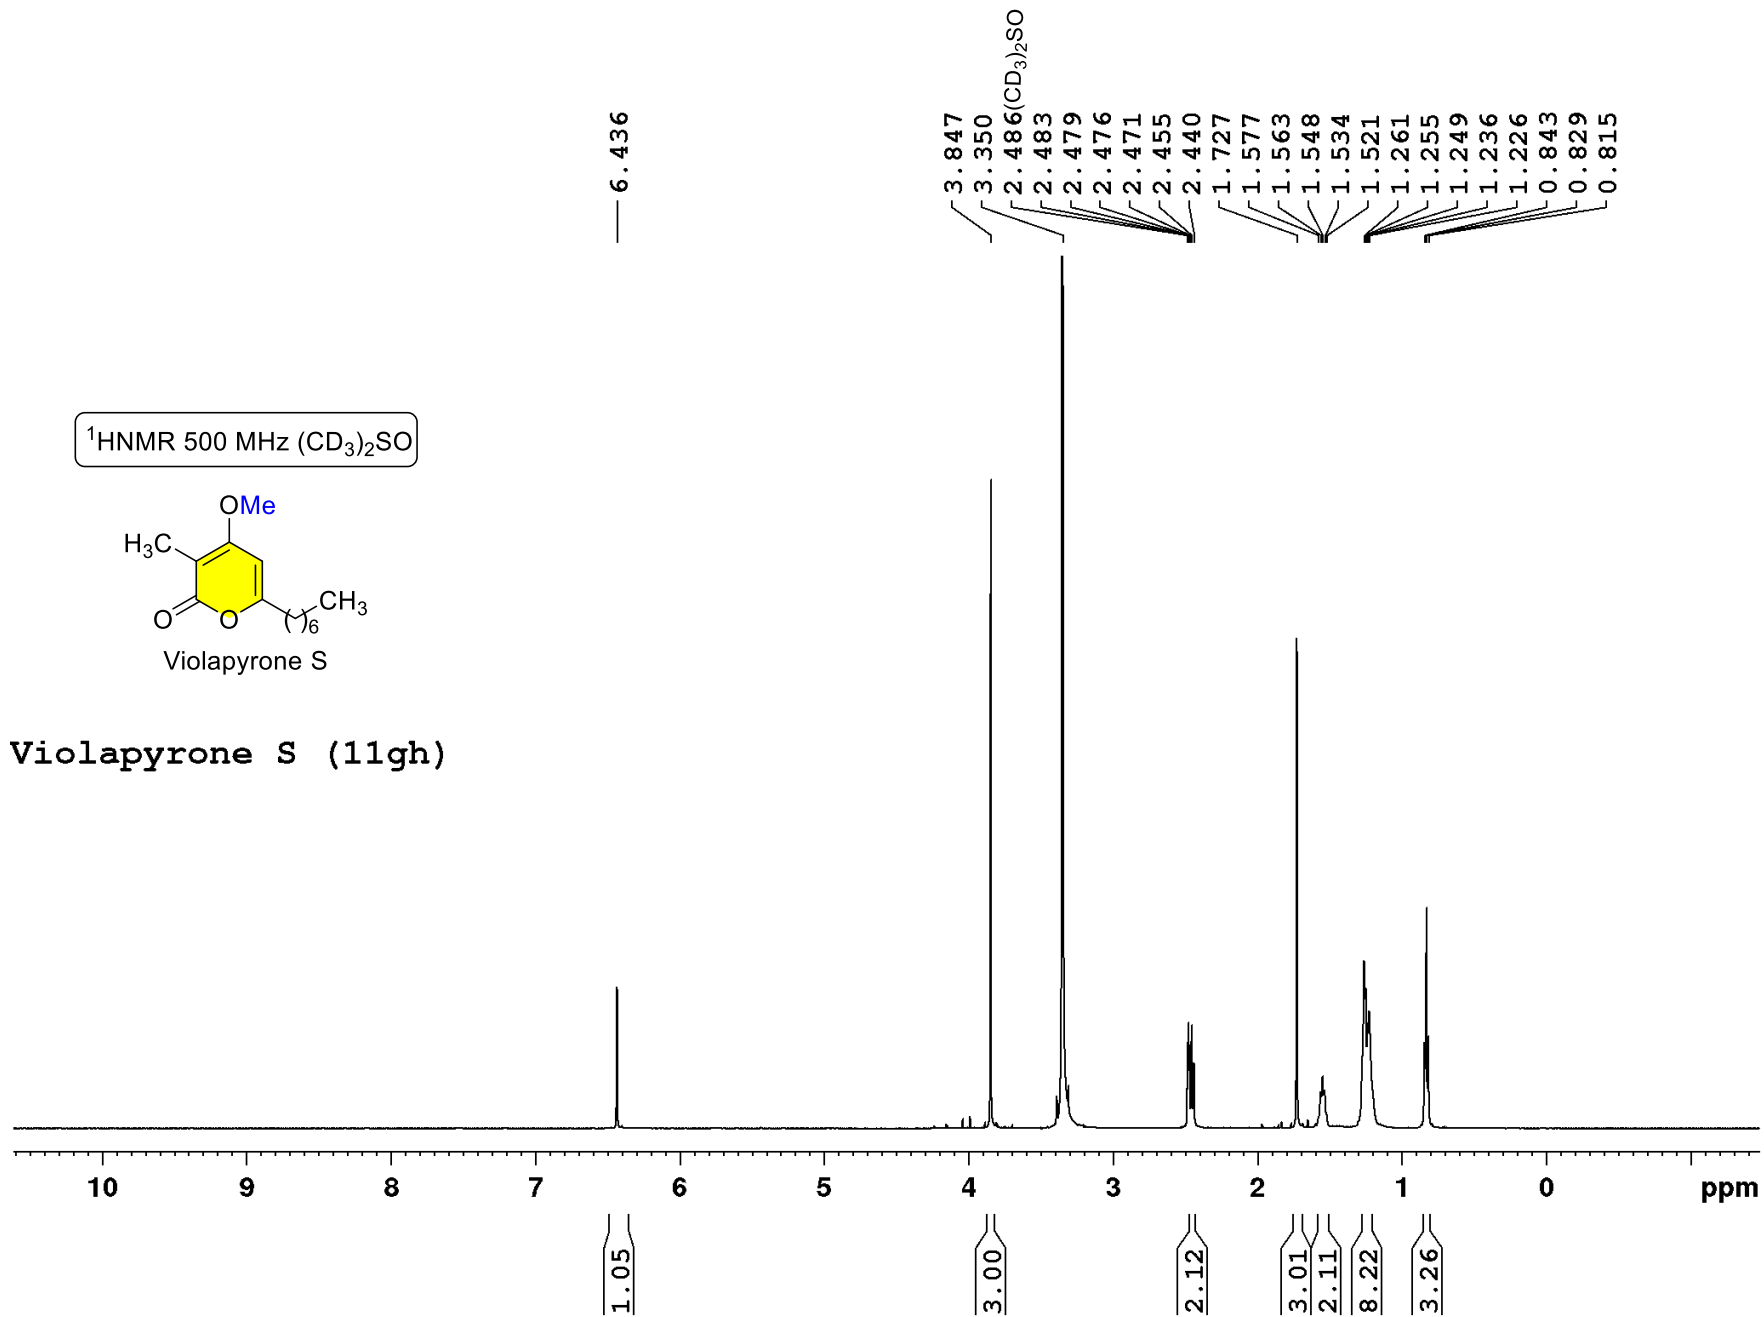

$^{13}\text{C} \{^1\text{H}\}$  NMR 500 MHz  $(\text{CD}_3)_2\text{SO}$

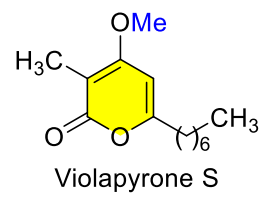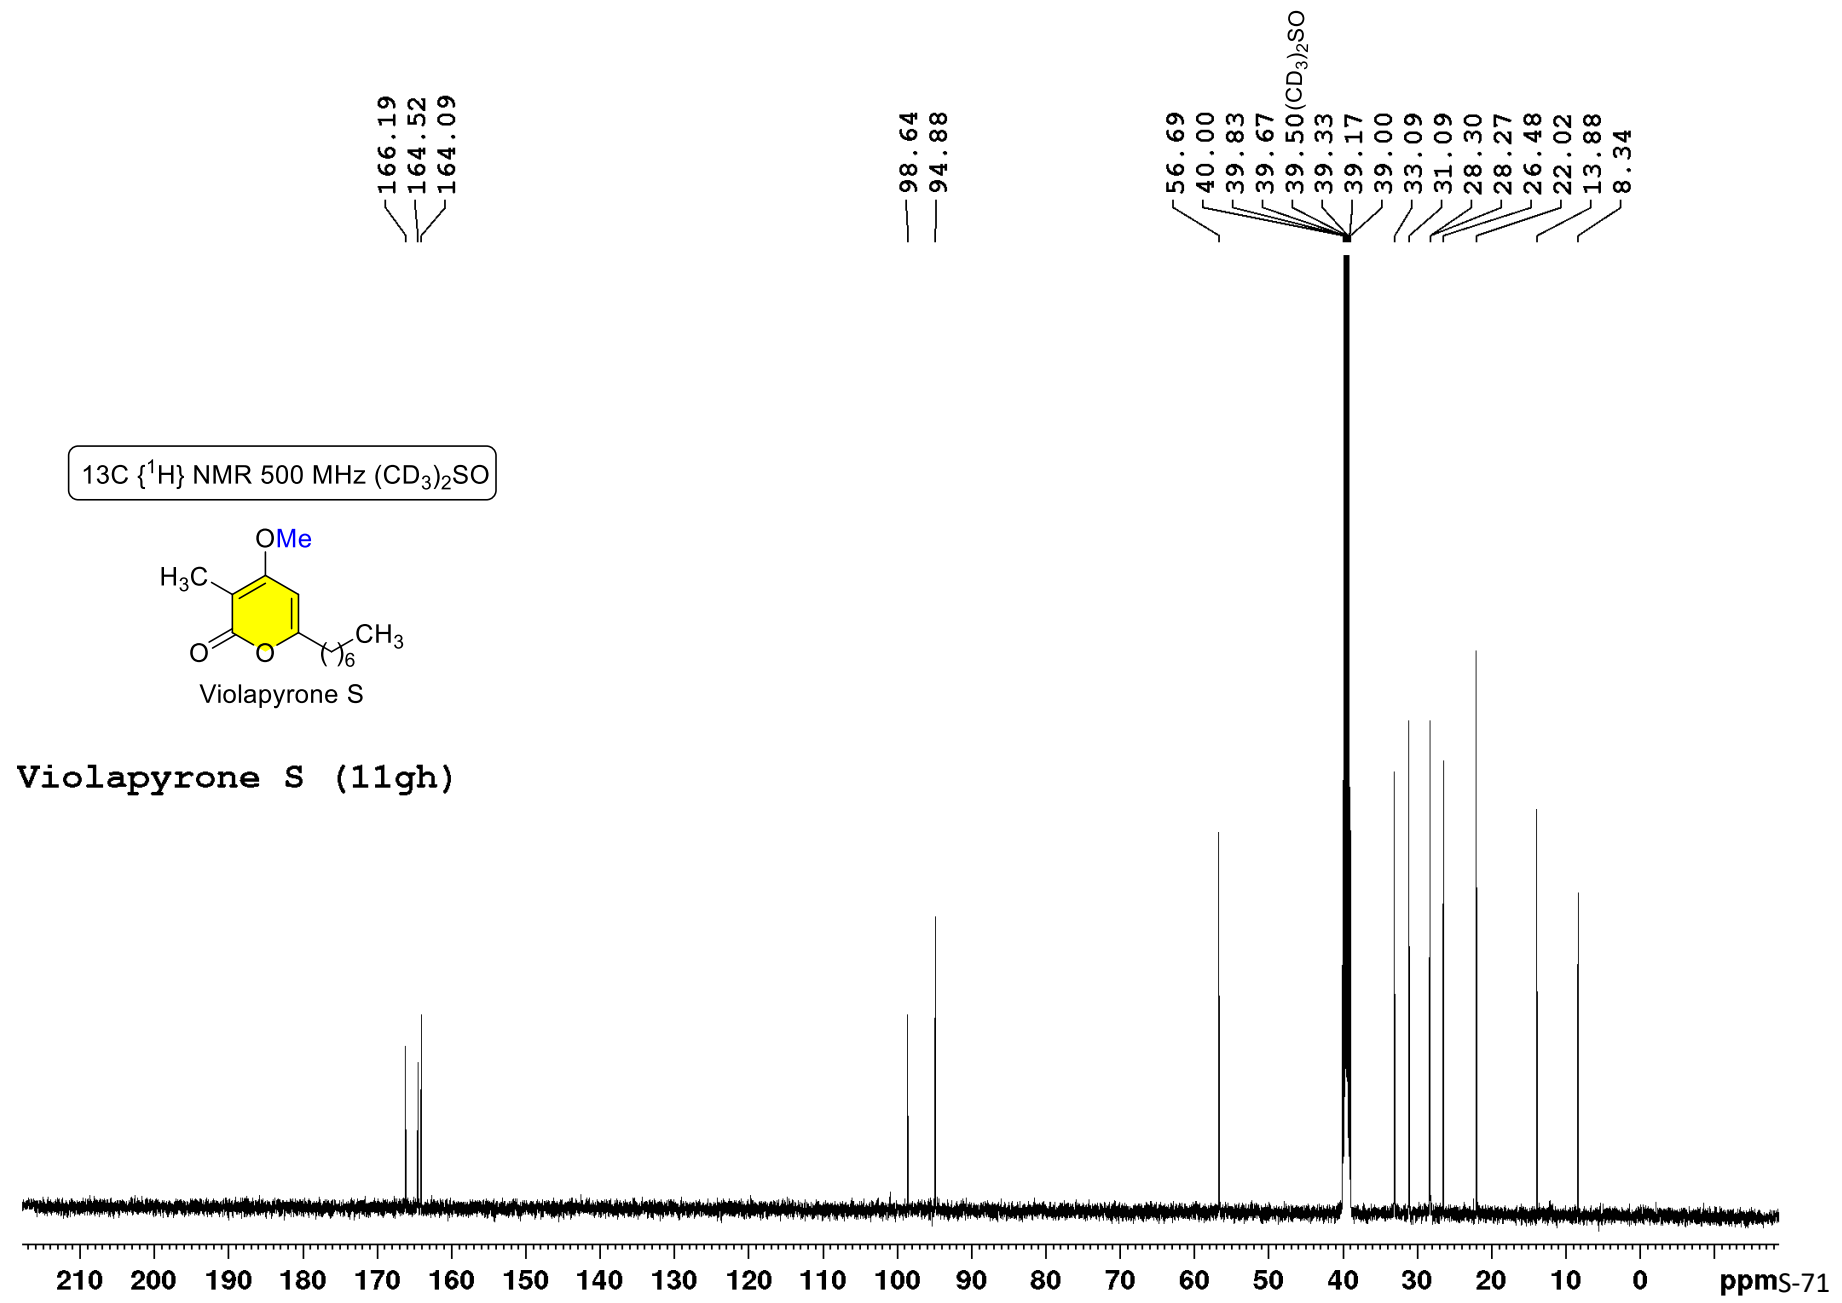

<sup>1</sup>HNMR 500 MHz (CD<sub>3</sub>)<sub>2</sub>SO

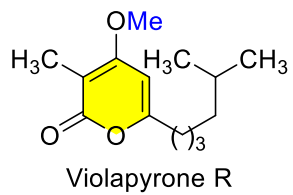

Violapyrone R (11hh)

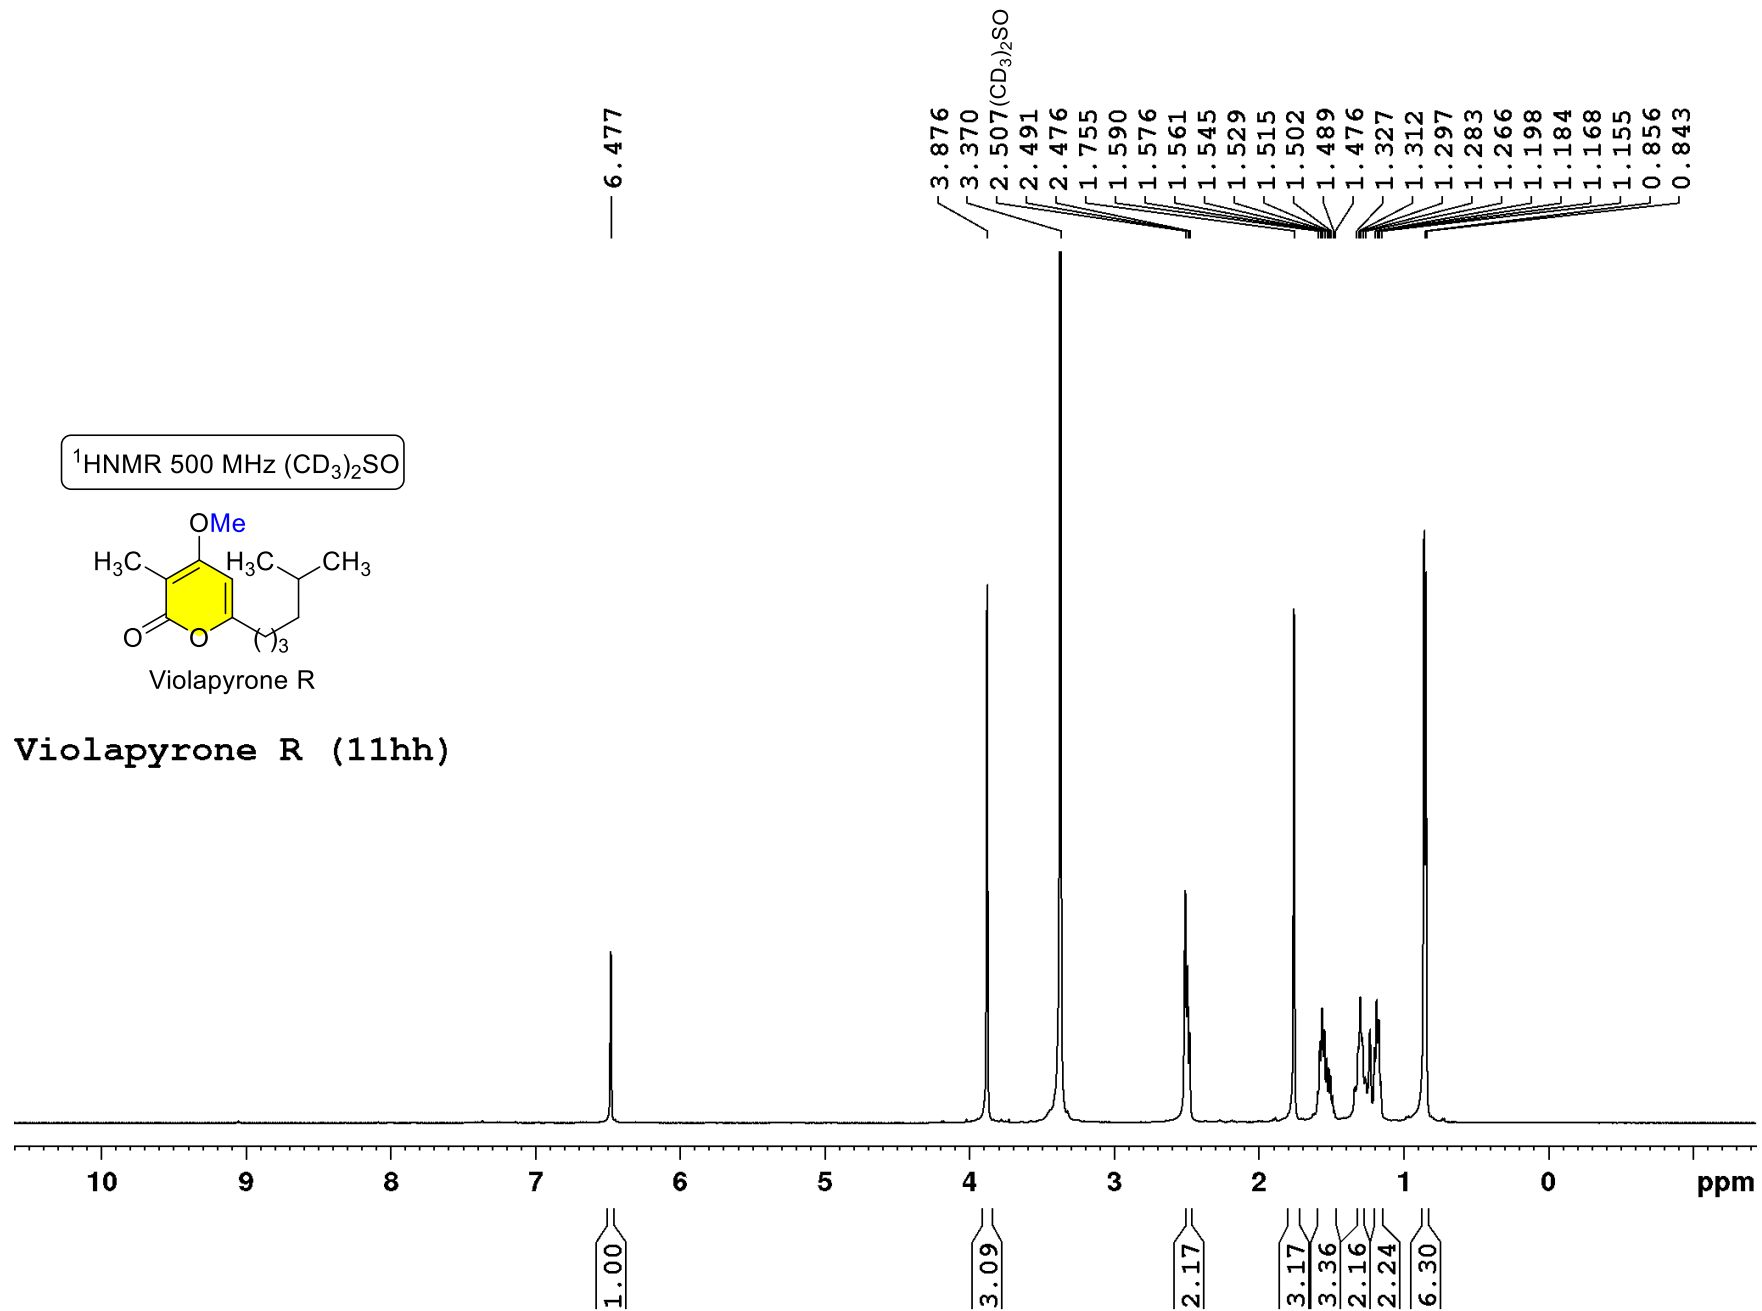



13C {1H} NMR 500 MHz (CD3)2SO

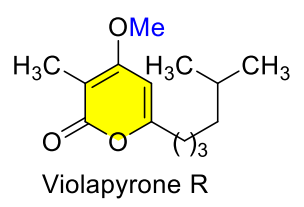

Violapyrone R (11hh)

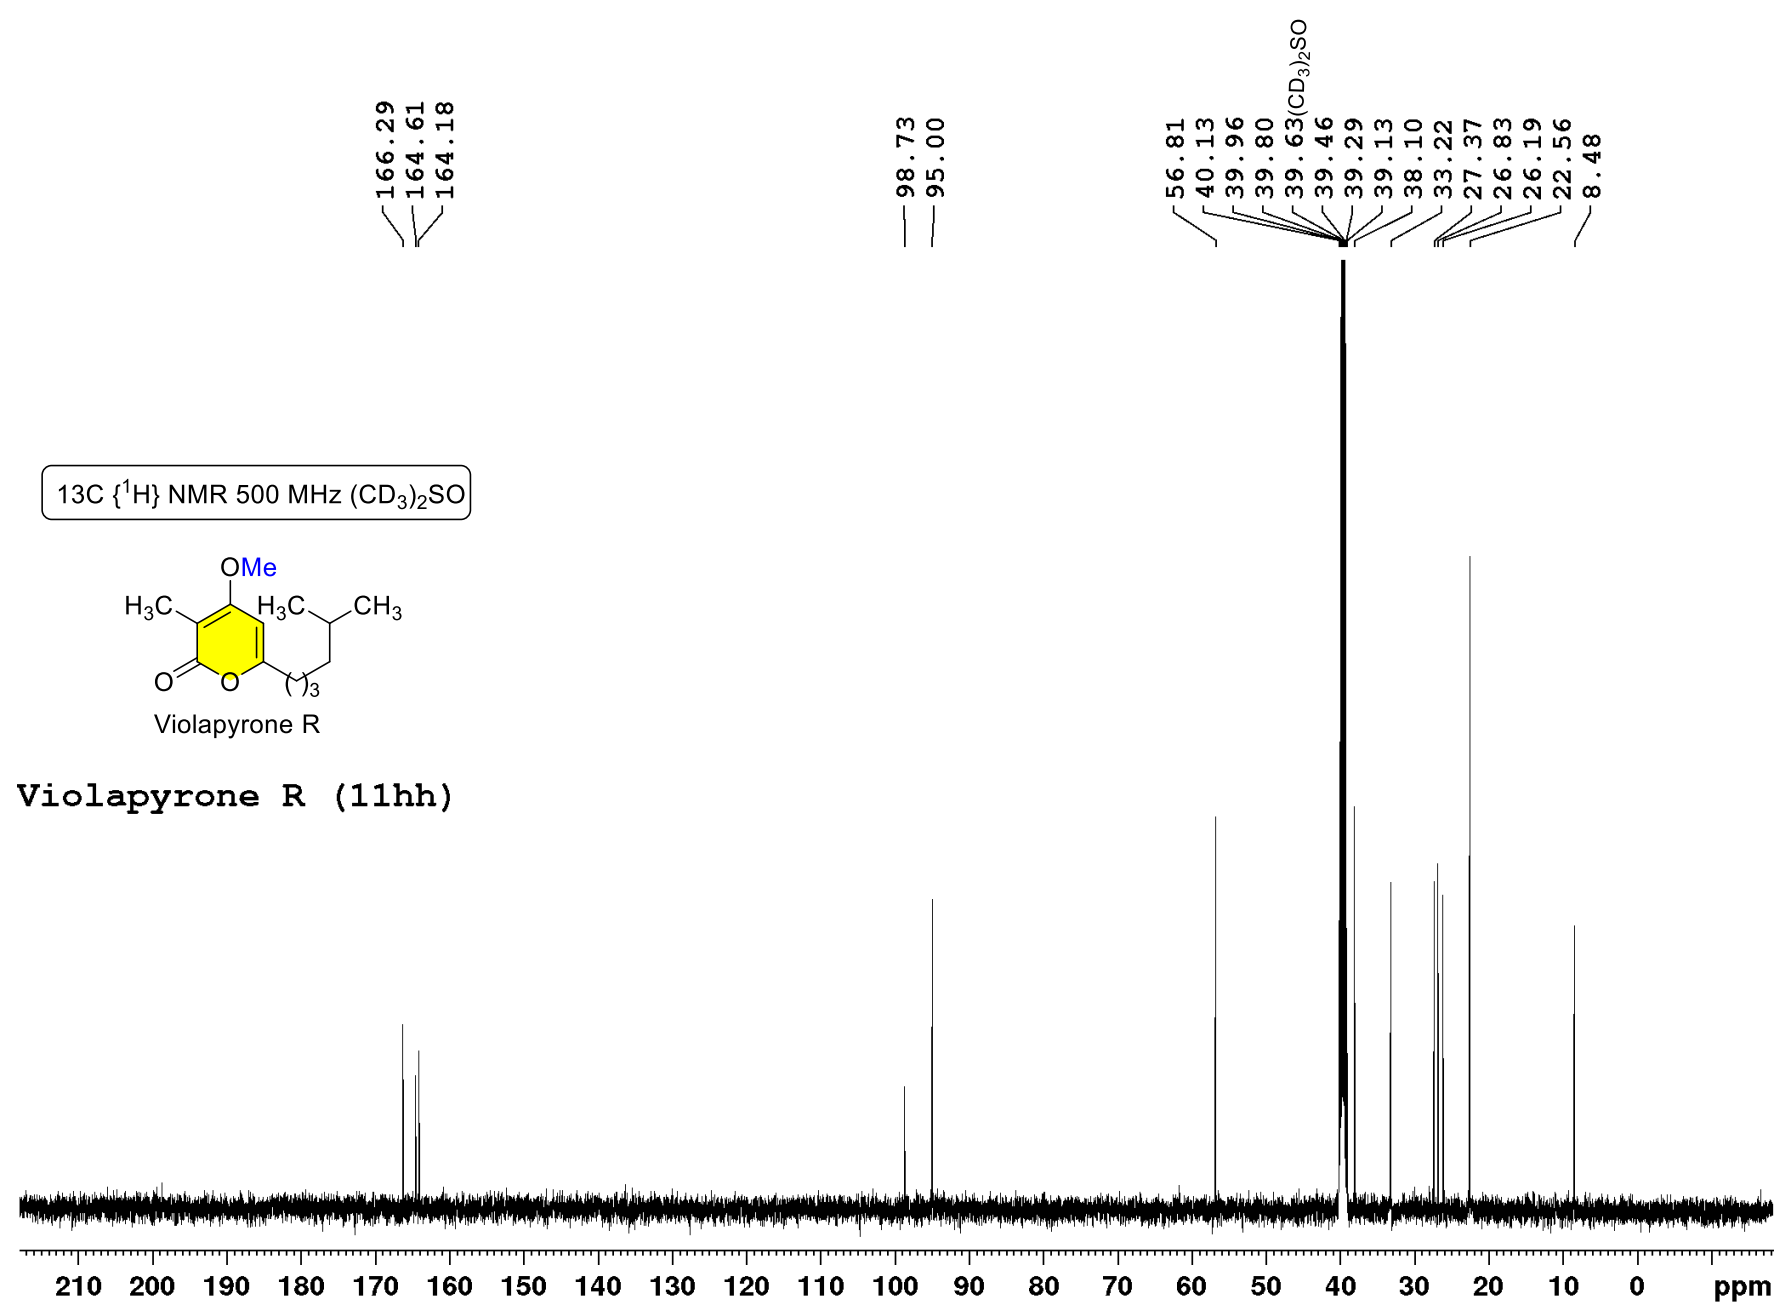

Supplement: d3ob01923c1.pdf [file d3ob01923c1.pdf]
